# 1 Multiple decisions about one object 2 involve parallel sensory acquisition 3 but time-multiplexed evidence 4 incorporation

5 Yul HR Kang<sup>1,2†§</sup>, Anne Löffler<sup>1†</sup>, Danique Jeurissen<sup>1,3†</sup>, Ariel Zylberberg<sup>1,4†¶</sup>, Daniel  
6 M Wolpert<sup>1‡</sup>, Michael N Shadlen<sup>1,3,5‡</sup>

**\*For correspondence:**

[shadlen@columbia.edu](mailto:shadlen@columbia.edu) (MNS);  
[yul.hr.kang@gmail.com](mailto:yul.hr.kang@gmail.com) (YHRK)

†These authors contributed  
equally to this work

‡These authors also contributed  
equally to this work

**Present address:** <sup>5</sup>Department of  
Engineering, University of  
Cambridge, UK; <sup>¶</sup>Department of  
Brain and Cognitive Sciences,  
University of Rochester, Rochester,  
New York, United States

7 <sup>1</sup>Zuckerman Mind Brain Behavior Institute, Department of Neuroscience, Columbia  
8 University, New York, United States; <sup>2</sup>Department of Engineering, University of  
9 Cambridge, UK; <sup>3</sup>Howard Hughes Medical Institute, Columbia University, NY, USA;  
10 <sup>4</sup>Department of Brain and Cognitive Sciences, University of Rochester, Rochester, New  
11 York, United States; <sup>5</sup>Kavli Institute

---

12 **Abstract** The brain is capable of processing several streams of information that bear on  
13 different aspects of the same problem. Here we address the problem of making two decisions  
14 about one object, by studying difficult perceptual decisions about the color and motion of a  
15 dynamic random dot display. We find that the accuracy of one decision is unaffected by the  
16 difficulty of the other decision. However, the response times reveal that the two decisions do not  
17 form simultaneously. We show that both stimulus dimensions are acquired in parallel for the  
18 initial ~0.1 s but are then incorporated serially in time-multiplexed bouts. Thus there is a  
19 bottleneck that precludes updating more than one decision at a time, and a buffer that stores  
20 samples of evidence while access to the decision is blocked. We suggest that this bottleneck is  
21 responsible for the long timescales of many cognitive operations framed as decisions.  
22

---

## 23 **Introduction**

24 Decisions are often informed by several aspects of a problem, each guided by different sources  
25 of information. In many instances, these aspects are combined to support a single judgment. For  
26 example, an observer might judge the distance of an animal by combining perspective cues, binoc-  
27 ular disparity and motion parallax. In other instances, the aspects are distinct dimensions of the  
28 same object. For example, the animal's distance and its identity as potential predator or prey. The  
29 former problem of cue combination (*Jacobs, 1999; Ernst and Banks, 2002*) is a topic of study in  
30 what has been termed the Bayesian vision or the Bayesian Brain (*Knill and Pouget, 2004*). The lat-  
31 ter is the subject of this paper. It arises in a wide variety of problems whose solutions depend on  
32 identifying a set of conjunctions such as the ingredients of a favorite dish, or when one must make  
33 multiple judgments, or decisions, about the same stimulus.  
34

35 The neuroscience of decision-making has focused largely on perceptual decisions, contrived  
36 to promote the integration of noisy evidence over time toward a categorical choice about one  
37 stimulus dimension. A well studied example is a decision about the net direction of motion of ran-  
38 domly moving dots. In such binary decisions (e.g., left or right), behavioral and neural studies have  
39 shown that humans and monkeys accumulate noisy samples of evidence and commit to a choice

40 when the accumulated evidence reaches a threshold (*Ratcliff, 1978; Palmer et al., 2005; Gold and*  
41 *Shadlen, 2007; Stine et al., 2020*). The framework has been extended to more than two categories  
42 (e.g., *Churchland et al. 2008; Bogacz et al. 2007; Ditterich 2010*) but it remains focused on a com-  
43 mon stream of evidence bearing on a single stimulus feature. Less is known about how multiple  
44 streams of evidence are accumulated for a multidimensional decision (*Lorteije et al., 2015*). Given  
45 the parallel organization of the sensory systems, one might expect all available evidence to be in-  
46 tegrated simultaneously. However, there are also reasons to suspect that two decisions cannot  
47 be made in parallel. This is based on a variety of experiments that expose a “psychological refrac-  
48 tory period” (PRP; *Welford 1952*). When participants are asked to make two decisions in a rapid  
49 succession, it appears that the second decision is delayed until the first decision is complete (*Pash-*  
50 *ler, 1994*). Based on such observations, it has been argued that there is a structural bottleneck in  
51 the response selection step, such that only one response can be selected at a time (*Sigman and*  
52 *Dehaene, 2005*).

53 Here we develop a task in which the participant views one visual stimulus and makes two deci-  
54 sions about the same object. The stimulus comprises elements that give rise to two streams  
55 of evidence bearing on their motion and color, and the participant must decide on both aspects  
56 and report the combined category. The task was designed to allow participants to integrate both  
57 streams of evidence simultaneously from the same location in the visual field and to require just  
58 one response. We show that, even in this situation, the two streams of evidence are accumulated  
59 one at a time. We show that this seriality arises despite the parallel access of the visual system to  
60 both streams. We suggest that seriality is explained by a bottleneck between the parallel acquisi-  
61 tion of evidence and its incorporation into separate decision processes. We elaborate a model of  
62 bounded evidence accumulation, used previously to explain both the speed and accuracy of mo-  
63 tion (*Palmer et al., 2005*) and color decisions (*Bakkour et al., 2019*), and show that these accumula-  
64 tions must occur in series. The results have implications for a variety of psychological observations  
65 concerning sequential vs. parallel operations, and they address the fundamental question of why  
66 mental processes take the time they do.

## 67 Results

68 We studied variants of a perceptual task that required binary decisions about two properties of  
69 a dynamic random dot display. Human participants decided the dominant color and direction of  
70 motion in a small patch of dynamic random dots (Fig. 1). The stimulus is similar to one introduced  
71 by Mante et al. (2013), who studied the problem of gating when making a decisions about only a  
72 single dimension, either color or motion. On each video frame, each dot has a probability of being  
73 colored blue or yellow and it has another probability of being plotted either at a displacement  $\Delta x$   
74 relative to a dot shown 40 ms earlier or, alternatively, at a random location in the display. We refer  
75 to the probability of a displacement as the coherence or strength and use its sign to designate  
76 the direction. We use an analogous signed probability for the color coherence or strength (see  
77 Methods). Participants reported their answer by making an eye or hand movement to select one  
78 of four choice targets. We refer to this as a double-decision and refer to the two aspects as stimulus  
79 dimensions. We employed several variants of this basic task in our study.

80 A brief précis of the experimental results may be helpful. We first present the main finding  
81 using a free response paradigm, what we term *double-decision reaction time*. It demonstrates no  
82 interference in choice accuracy—that is, the difficulty of the color decision does not affect the ac-  
83 curacy of motion decisions, and vice versa—but critically, the double decision time is the sum of  
84 the two single decision times. The analysis suggests that the motion and color decisions are not  
85 formed at the same time. This establishes the prediction that with brief stimulus presentations,  
86 successful color decisions ought to be attained at the expense of motion, and vice versa—that is,  
87 choice interference. We then test this prediction and fail to confirm it. We show that color and  
88 motion can be acquired in parallel but are unable to update the decision simultaneously. This  
89 confirms the response selection bottleneck predicted by Pashler (*Fagot and Pashler, 1992*) and it

90 implies the existence of buffers (*Sperling, 1960; Kamienkowski and Sigman, 2008*), where sensory  
91 information can be held before it updates a decision variable—the accumulated evidence for color  
92 or motion.

93 The combination of a buffer and serial updating leads to a revised prediction that interference  
94 in accuracy should occur over a narrow range of stimulus viewing duration, controlled by the exper-  
95 imenter. We confirm this prediction, showing that there is no interference at short viewing times,  
96 but that there is a narrow regime of the stimulus duration in which accuracy on one dimension suf-  
97 fers because a limited amount of deliberation time needs to be shared with the other dimension,  
98 which reconciles conflicting observations of parallel and serial patterns of decision-making in the  
99 literature (e.g., *Schumacher et al. 2001; Tombu and Jolicoeur 2004*). We then introduce a bimanual  
100 version of the task which affords direct report of both the color and motion termination times. It  
101 confirms the assumption that the double-decision time is the sum of two sequential sampling pro-  
102 cesses, each with its own stopping time, and it shows that the color and motion decisions compete  
103 before the first decision terminates. This implies some form of time-multiplexed alternation. In  
104 the last experiment we ask participants to judge whether the motion in a pair of patches are the  
105 same or different and find that this binary decision also exhibits additive decision times. Finally, we  
106 introduce a conceptual model of the double-decision process that serves as a platform to connect  
107 the computational elements with known and unknown neural mechanisms.

### 108 **Double-decision reaction time**

109 Participants were asked to judge both the net direction (left or right) and dominant color (yellow  
110 and blue) of a patch of dynamic random dots and to indicate both decisions with a single move-  
111 ment to one of four choice targets (Fig. 1A). Different groups of participants performed the task by  
112 indicating their choices with an eye movement or a reach (see Fig. 5A). On each trial the strength  
113 and direction of motion as well as the strength and sign of color dominance were chosen indepen-  
114 dently, leading to 81 ( $9 \times 9$  eye) or 121 ( $11 \times 11$  arm) combinations. The single movement furnished  
115 two decisions and one reaction time (RT). Participants were given feedback that the decision was  
116 correct if the motion and color were both correct (see Methods).

117 Fig. 2A & B shows choices and mean RT as a function of stimulus strength for the eye and  
118 hand tasks, respectively. The graphs in the left column of each panel show the data plotted as  
119 a function of motion strength and direction. Each color on this graph corresponds to a different  
120 difficulty of the other dimension (i.e., color). Similarly, the graphs in the right columns show the  
121 data plotted as a function of color strength and dominance; the uninformative dimension, motion,  
122 is shown by color. Unsurprisingly, the proportion of rightward choices increased as a function of  
123 the sign and strength of the motion coherence, and the proportion of blue choices increased as a  
124 function of the sign and strength of color coherence. The slopes of these logistic functions supply  
125 an estimate of sensitivity. The striking feature of these graphs is that sensitivity to variation in the  
126 stimulus along each dimension is unaffected by the difficulty along the uninformative dimension.  
127 This is evident from the superposition of the colored data points. It is also supported by a logistic  
128 regression analysis, which favored a choice model in which the sensitivity along one dimension is  
129 not influenced by the stimulus strength along the other dimension ( $\Delta\text{BIC} = 23$  and  $22$  for motion  
130 and color in the eye task, respectively;  $\Delta\text{BIC} = 37$  and  $50$  for the hand task; positive values are  
131 support for the regression model of Eq. 12 without the  $\beta_3$  term). It implies that the two stimulus  
132 dimensions do not interfere with each other. This is consistent with the well established idea that  
133 color and motion are processed by parallel, independent channels (*Carney et al., 1987*). However,  
134 another possibility is that the two dimensions do not interfere because they are not processed  
135 simultaneously but serially.

136 Indeed, the RTs support this serial hypothesis. The reaction times, plotted as a function of either  
137 motion or color, exhibit inverted U-shapes, such that longer reaction times are associated with the  
138 most difficult stimulus strength and the fastest with the easiest. In contrast to the choice functions,  
139 the uninformative dimension—that is, with respect to the dimension of the abscissa—affects the

140 scale of these RTs, giving rise to a stacked family of inverted U-shaped functions. The more difficult  
141 the other dimension, the longer the RT.

142 We attempted to explain the choice-RT data in Fig. 2 with models of bounded evidence inte-  
143 gration (e.g., drift-diffusion; *Ratcliff 1978; Palmer et al. 2005*). Such models provide excellent ac-  
144 counts of choice and RT on the motion-only and color-only versions of these tasks (*Palmer et al.,*  
145 *2005; Bakkour et al., 2019*). To explain the double-decision data set we pursued two variants of  
146 these models under the assumption that motion and color are processed in parallel or in series.  
147 The curves in Fig. 2 are a mixture of fits and predictions. To fit the data (open symbols), we used  
148 all trials in which at least one of the dimensions was at its strongest level (32 purple conditions in  
149 Fig. 1B for the eye task and 40 conditions for the hand task). We used these fits to predict the data  
150 from the remaining conditions (49 amber conditions for the eye, Fig. 1B and 81 for the hand; filled  
151 symbols, Fig. 2). Both models are consistent with no interference in the choice functions. Thus the  
152 fit to the 32 or 40 conditions supplies all the predicted choice functions.

153 The models can be distinguished on the basis of the RT data. For an experiment with only a  
154 single dimension (e.g. motion), the RT is the sum of the amount of time that evidence is integrated  
155 to reach a terminating bound (the decision time,  $T_m$  or  $T_c$ , for motion and color choice respectively)  
156 plus additional time for sensory and motor delays, termed the non-decision time ( $T_{nd}$ ). If the color  
157 and motion decisions are made in parallel, then the total decision time should be determined by  
158 the slower process ( $\max[T_m, T_c]$ ), whereas if the decisions are made serially, the total decision time  
159 would be determined by the sum of the two decision times ( $T_m + T_c$ ). In both cases, we expect  
160 both motion and color strengths to affect the RT. In the serial case, an increase in the difficulty  
161 of color, say, should augment the total RT by the same amount for all motion strengths, giving  
162 rise to stacked functions of the same shapes (solid curves, middle row, Fig. 2A,B). In the parallel  
163 case, an increase in the difficulty of color should augment the total RT by an amount that depends  
164 on the difficulty of motion (solid curves, bottom row Fig. 2A,B). The color dimension is likely to  
165 determine the total RT when motion is strong, but it has less control when the motion is weak.  
166 The logic should produce stacked bell-shaped functions that pinch together in the middle of the  
167 graph. The data are better explained by the serial predictions (e.g. large mismatches when both  
168 dimensions are weak). Formal model comparison provides strong support for the serial models  
169 overall (geometric mean of Bayes factor across participant and task combinations:  $> 10^{39}$ ) and for  
170 9 out of 11 participants individually (*Figure 2-Figure Supplement 1*).

171 We pursued a second approach to compare serial and parallel integration strategies, focusing  
172 specifically on the decision times. Unlike the fits to choice-RT, this method uses each participant's  
173 choices as ground truth. It considers only the distribution of RTs and attempts to account for them  
174 under serial and parallel logic. Instead of diffusion models, we estimated the marginal distributions  
175 for each 1D decision time and the four  $T_{nd}$  distributions (for each choice) with gamma distributions.  
176 For the serial case the predicted RT distributions are established by convolution of the marginal  
177 single-dimension distributions and the distribution of  $T_{nd}$ . For the parallel case the marginals are  
178 combined using the max logic, and the result is convolved with the appropriate distribution of  $T_{nd}$   
179 (see Methods). *Figure 2-Figure Supplement 2* shows fits to the reaction time distribution for the  
180 more informative conditions for the serial and parallel models. The model comparisons, based on  
181 all the data, yield "decisive" support (*Kass and Raftery, 1995*) for the serial processing of motion  
182 and color (geometric mean of Bayes factor for participant and task combinations  $> 10^{18}$  with all  
183 participants' individually supporting the serial rule; *Figure 2-Figure Supplement 3*). We also display  
184 the mean RTs derived from the fits in the same format as Fig. 2 (*Figure 2-Figure Supplement 4 &*  
185 *Figure 2-Figure Supplement 5*).

186 The finding favors additive decision times, from two independent decision processes, each with  
187 its own termination rule. However, it does not discern the nature of the serial processing (e.g.,  
188 whether they alternate or one is prioritized). We will consider this issue later.

## 189 **Brief stimulus presentation**

190 The results from the double-decision RT experiment support sequential updating of two decision  
191 variables, which represent accumulated evidence for the motion and color choices. If this is true,  
192 it leads to a straightforward prediction. If the stimulus duration is not controlled by the decision  
193 maker but by the experimenter, and if it is brief, then the two stimulus dimensions would compete  
194 for the limited processing time, and we ought to observe choice-interference. We therefore con-  
195 ducted a second experiment in which we limited the duration of the stimulus viewing time to just  
196 120 ms. We know from previous experiments with 1D tasks that performance increases with stim-  
197 ulus durations greater than one half second (*Kiani et al., 2008; Waskom and Kiani, 2018*). Thus  
198 it is reasonable to assume that performance accuracy would suffer if it is not possible to make  
199 use of the full 120 ms of evidence for both motion and color. We predicted that sensitivity to both  
200 color and motion should be worse on the double-decision task than on color-only and motion-only  
201 versions of the identical task.

202 To our surprise, double-decisions were just as accurate as their 1D controls (Fig. 3A). We also  
203 observed no change in the sensitivity to color across the range of motion difficulties, and vice versa  
204 ( $\Delta\text{BIC} = 9$  and  $10$  for motion and color choices, respectively, in support of no interaction; Eq. 11,  
205  $H_0 : \beta_3 = 0$ ). This suggests that evidence for color and motion were acquired simultaneously, in  
206 parallel, and without interference. Further support for this conclusion is adduced from an analysis  
207 of the stimulus information used to make the decisions—what is known as psychophysical reverse  
208 correlation or kernel (*Beard and Ahumada, 1998; Okazawa et al., 2018*). Fig. 3B displays the degree  
209 to which trial-by-trial variation in the noisy displays influences the choice (see Methods). It shows  
210 that these stimulus fluctuations influenced choices almost identically in the double-decision task  
211 and 1D controls.

212 At first glance, the observation seems to be at odds with our interpretation of the double-  
213 decision RT experiment, which provided strong support for serial processing, primarily in the pat-  
214 tern of RTs. Here, the entire stimulus stream lasts only 120 ms, which is less than a typical sac-  
215 cadic latency to a bright spot. Nevertheless, participants exhibited variation in the time of their  
216 responses as a function of stimulus strength (Fig. 3A, bottom panels) and these response times  
217 were surprising long. The fastest were  $\sim 300$  ms longer than the stimulus ( $RT > 400$  ms). Impor-  
218 tantly, they are approximately 100-200 ms longer in the double-decisions than in single decisions.  
219 It is difficult to make too much of this observation, because the participants might have procrast-  
220 inated for reasons unrelated to the dynamics of the decision process. However, procrastination  
221 would not explain the difference between the two conditions. As parallel acquisition of the 120 ms  
222 color and motion take the same amount of time as acquisition of either of the streams alone (by  
223 definition), the extra time in the double decision is probably explained by serial incorporation of  
224 evidence into the two decisions. This observation also implies the existence of buffers that store  
225 the information from one stream as it awaits incorporation into the decision.

226 Our results so far suggest that color and motion information are acquired in parallel but are  
227 incorporated into the decision in series. We therefore wondered if the same schema might apply  
228 to the double-decision RT task. For this to hold, some kind of alternation must occur such that  
229 segments of one or the other stimulus stream is not incorporated into its decision. Suppose, for  
230 example, that at  $t=120$  ms, motion information had been incorporated into decision variable  $V_m$ ,  
231 and color information had been stored in a buffer. Suppose further that motion continues to  
232 update the decision variable,  $V_m$ , until it reaches a termination bound at  $t = T_m$ , and only then  
233 can the buffered color information be incorporated into decision variable,  $V_c$ . From then on color  
234 information could update  $V_c$  until this decision terminates. In this imagined scenario, the color  
235 information between  $0.12 < t < T_m$  is not incorporated in the decision.

236 One might also imagine two alternatives to the latter part of this scenario. In both, the informa-  
237 tion from color continues to update the buffer (but not  $V_c$ ) throughout the motion decision without  
238 loss. Then at  $t = T_m$  either (i) all the information about color is incorporated immediately into  $V_c$



239 or (ii) the buffered information is incorporated in  $V_c$  over time (e.g., as if the recorded color infor-  
240 mation is played back). The first alternative is equivalent to the parallel model that is inconsistent  
241 with the data. The second scenario, implausible as it may seem, implies the color decision is blind  
242 to the color information in the display during the playback of the recorded color information (i.e.,  
243  $T_m < 2T_m$ ). These alternatives are not intended as serious models but to convey two general intu-  
244 itions. First, if there is a buffer at play in the 2D reaction time task then it must take time for the  
245 buffered information to be incorporated, or the RTs would have conformed to the parallel logic.  
246 Second, if the duration of the buffer is finite, when both 1D processes require more processing  
247 time than the duration of the buffer, there will be portions of the color and/or motion stimulus  
248 that do not affect the decision.

249 One might therefore ask why the second point does not lead to a reduction in sensitivity (or  
250 accuracy) in color, say, when motion is weak and competes with color for processing time. The  
251 answer is that when the decision maker controls the termination of the decision, they can com-  
252 pensate the missing information by collecting more until the level reaches the same terminating  
253 bound. This leads to a straightforward prediction. If the experimenter controls the termination  
254 of the evidence stream, then missing portions of the color and/or motion stimulus might impair  
255 performance, especially when the other stimulus dimension is weak.

### 256 Variable stimulus duration

257 We therefore predicted that under conditions in which the experimenter controls the viewing du-  
258 ration, there is an intermediate range of viewing durations, greater than 120 ms and less than the  
259 average RT of difficult double decisions, where we might observe interference in sensitivity. To  
260 appreciate this prediction, it is essential to recognize that when the experimenter controls view-  
261 ing duration of a random dot display, the decision maker applies a termination criterion, as they  
262 do in free response (RT) experiments (*Kiani et al., 2008*). There is no overt manifestation of this  
263 termination, although it can be identified by introducing perturbations to the stimulus (see also  
264 *Kang et al. 2017*). Before such termination, accuracy improves by the square root of the stimulus  
265 viewing duration ( $\sqrt{t}$ ) as expected for perfect integration of signal-plus-noise. In a double-decision,  
266 when the two decision processes are splitting the time equally, the accuracy of each should only  
267 improve by  $\sqrt{t/2}$ . However, when one process terminates, the rate of improvement of the other  
268 process should recover, until that process reaches its terminating bound. The model predicts a  
269 range of stimulus strengths and viewing durations in which interference in accuracy ought to be  
270 evident. It also predicts that the range and degree of interference might depend on which stimulus  
271 dimension the participant prioritizes. Here we set out to test this prediction.

272 Two participants performed this variable stimulus duration task in 12-16 sessions. The task  
273 was identical in structure to the brief-duration experiment. However, stimuli were presented at  
274 fixed durations ranging from 120 to 1200 ms (in steps of 120 ms). Only three levels of difficulty  
275 were used for each dimension: one easy and two difficult coherence levels (adjusted individually  
276 to yield 80% and 65% accuracy, respectively; see Methods). All  $6 \times 6$  combinations of motion  $\times$   
277 color coherences were presented.

278 Fig. 4 shows the sensitivity to motion and color as a function of stimulus duration, when the  
279 other stimulus dimension was easy or difficult. The sensitivity is the slope of a logistic fit of the  
280 motion (or color) choices to the three levels of difficulty (see Methods). Notice that for both partic-  
281 ipants, there is no difference in the slopes at the shortest stimulus duration (120 ms), consistent  
282 with the findings above. However both participants exhibited lower sensitivity at intermediate  
283 durations when color choices were coupled with difficult motion. This difference implies an inter-  
284 ference. It is less compelling, if present at all, when motion choices are coupled with difficult color.  
285 This pattern in which motion difficulty affects color sensitivity but not vice-versa is consistent with  
286 participants prioritizing one decision over the other. This would arise if participants consistently  
287 monitored the motion stream first and turned to color after the motion decision terminated. In this  
288 case the difficulty of the color would not affect the decisions for motion, but harder motion would

289 take longer to terminate thereby leaving less time for color processing. We therefore used a model  
290 in which one decision was prioritized over another by including a parameter that determined the  
291 probability that motion would be processed first. We also included a parameter that controls the  
292 duration of the stimulus streams that can be held in the buffer. This is, effectively, the amount  
293 of stimulus information that can be acquired in parallel. The best fits of the model, shown by the  
294 smooth curves (Fig. 4A) suggest the buffer capacity of 40-200 ms worth of stimulus information  
295 (Fig. 4B & **Figure 4-Figure Supplement 1**) and prioritization of motion on approximately 80-96% of  
296 trials. Had the buffer capacity been tiny, the model would be purely serial and if the buffer dura-  
297 tion was very large, then the model would be parallel. Both such buffer capacities provide very  
298 poor fits to the data (**Figure 4-Figure Supplement 2**).

299 The findings therefore support our prediction and in doing so, they support the hypothesis that  
300 a common principle explains the double decisions ranging from a tenth to at least two seconds and  
301 whether this duration is controlled by the experimenter or by the decision maker. Namely, there is  
302 parallel acquisition but serial incorporation of color and motion into the double-decision process.  
303 The interference in choice accuracy demonstrated in this experiment is the only example of choice  
304 interference in our study. It is remarkably elusive, because it can be observed only for stimulus du-  
305 rations for which three conditions are satisfied: (i) the duration of the stimulus is long enough that  
306 parallel acquisition is no longer possible; (ii) the duration of the stimulus is short enough that ac-  
307 curacy on one dimension would benefit from additional sensory evidence; (iii) the duration should  
308 support termination of the other dimension for strong but not weak stimuli. The interference is  
309 also deceptive. It is explained by a competition for processing time, not by an interaction affecting  
310 the fidelity of the sensory streams themselves. It is an example of resource sharing (**Tombu and**  
311 **Jolicœur, 2002, 2005; Kahneman, 1973**), but the resource is time, specifically.

### 312 **Separate effectors (bimanual)**

313 There are two important features of the serial model: the existence of two decision variables that  
314 are terminated independently, and that these accumulations are not updated at the same time  
315 but in series. A limitation in the experiments so far is that we had access to the completion of the  
316 double decision but not to the completion of each component. Therefore, we could only speculate  
317 about which decision completed first and when. Without knowledge of the first decision time, we  
318 cannot tell how often a participant switched between updating the motion and color decision vari-  
319 ables. For example, the prioritization considered in the previous section could arise by completing  
320 one decision before deliberating on the second or by alternating back and forth on a schedule  
321 that allocates more time to motion. Therefore, we conducted an experiment in which participants  
322 indicated their choice and RT for each stimulus dimension using separate effectors.

323 The eight participants who performed the unimanual version of the double-decision RT task  
324 also performed a bimanual version of the same task (Fig. 5A). In the unimanual version, partici-  
325 pants used a handle to move a cursor to one of four targets that simultaneously communicated  
326 color and motion decisions. In the bimanual version, participants indicated their motion decision  
327 by moving one of the handles in a left/right direction and indicated their color decision with a for-  
328 ward/backward movement of the other handle. Participants were encouraged to independently  
329 indicate their color and motion decisions. To facilitate this, they received extensive training, con-  
330 sisting of blocks in which one of the stimulus dimensions was set at its easiest level. Both the order  
331 of the tasks (unimanual and bimanual) and the hand assignments (left/right × color/motion) were  
332 balanced between the participants (see Methods).

333 Before tackling the questions that motivate the bimanual experiment, we first ascertained whether  
334 participants used the same strategy to make bimanual double-decisions as they did on the uniman-  
335 ual version. It seemed conceivable that by using separate hands to indicate the motion and color  
336 decisions, participants could achieve parallel decision formation, for example, as a pianist reads  
337 the treble and bass staves with the left and right hands, typically. We therefore conducted a model  
338 comparison similar to that of Fig. 2. To fit the models, we used the color and motion choice on

339 each trial along with the second response time ( $D_{2nd}$ ) regardless of whether it was to indicate di-  
340 rection or color. This allows us to fit models that are identical to those used in the unimanual task  
341 (Fig. 2). In the bimanual task, the final RTs ( $RT_{2nd}$ ) are well described by the fits to the unimanual  
342 double-decision RTs (Fig. 5). We illustrate this in two ways. In the figure, the solid traces are not  
343 fits to the bimanual data; they are fits to the unimanual data shown in Fig. 2B. Clearly the choice  
344 probabilities and response times displayed in the bimanual task are well captured by the model fit  
345 to the unimanual task. The actual fits are shown in **Figure 5–Figure Supplement 1**, and model com-  
346 parison favors the serial over the parallel model for seven of the eight participants (**Figure 2–Figure**  
347 **Supplement 1**). Importantly, the participants' behavior was strikingly similar in the unimanual and  
348 bimanual versions of the task.

349 The similarity between the two versions of the task is also supported with a model-free analy-  
350 sis. In **Figure 5–Figure Supplement 2** we superimpose the accuracy and the reaction times for the  
351 unimanual and bimanual tasks. There is an almost perfect overlap between these two aspects of  
352 choice behavior, providing further support for a common set of processes operating in both ver-  
353 sions of the task. It provides direct evidence for two termination events, as assumed in our model  
354 fits. This rules out a class of models of the double decision as a race among four accumulations  
355 for each of the color-motion combinations, what we term targetwise integration, as these models  
356 posit only one double-decision time.

357 The bimanual task allows us to distinguish between two variants of the serial model that were  
358 not distinguishable in the unimanual task. In the first variant, the *single-switch* model, the decision  
359 maker only switches from one decision to the next when the first decision is completed. Thus the  
360 decision that terminates first ( $D_{1st}$ ) is the one that is evaluated first, and only then the other deci-  
361 sion is evaluated. In the second variant, the *multi-switch* model, the decision maker can alternate  
362 between decisions even before finalizing one of them. If little time is wasted when switching, these  
363 two models make similar predictions for the response time in the unimanual task: the response  
364 time will be the sum of the two decision times plus the non-decision latencies. However, the mod-  
365 els make qualitatively different predictions for how the response time for  $D_{1st}$  depends on the  
366 difficulty of the other decision.

367 The single-switch model predicts the response time for  $D_{1st}$  is independent of the difficulty of  
368 the decision reported second ( $D_{2nd}$ ). That is because  $D_{2nd}$  is not evaluated until the first decision  
369 is completed. The prediction of the multi-switch model is less straightforward. Suppose that in a  
370 given trial the motion decision is easy and the color decision is difficult. If the color was reported  
371 first, the motion was probably not evaluated at all before committing to  $D_{1st}$ , since if it had been  
372 evaluated it would most likely have ended before the color decision. In contrast, if both dimen-  
373 sions were difficult, which decision was reported first is largely uninformative about the number  
374 of alternations between color and motion that occurred before committing to the first decision;  
375 since both decisions take longer to complete, it is possible that both have been evaluated before  
376 one of them terminated. Therefore, the multi-switch model predicts that the first decision takes  
377 longer the more difficult the other decision is: when  $D_{2nd}$  is easy, it is more likely that it was not  
378 considered before committing to the  $D_{1st}$  decision and thus the average response time is shorter.

379 To disambiguate between the single-switch and multi-switch models, we fit both models to the  
380 data from the bimanual task. First, we fit a serial model identical to that of Fig. 2 to the data from  
381 the bimanual task. We used the same procedure as in Fig. 2; that is, we ignore  $RT_{1st}$  and fit  $RT_{2nd}$   
382 and the choices given to the two decisions. Then, we used three additional parameters to attempt  
383 to explain  $RT_{1st}$ . These parameters are the average time between switches ( $\tau_{\Delta}$ ), the probability of  
384 starting the trial evaluating the motion decision ( $p_{motion-1st}$ ), and the non-decision time for the first  
385 decision ( $T_{nd}^{1st}$ ). These parameters only affect  $RT_{1st}$ ; they do not influence  $RT_{2nd}$  nor the choices  
386 made for the two decisions. The three parameters were fit to minimize the mean-squared error  
387 between the models' predictions and the data points (Fig. 6; Table 3). The single switch model is  
388 a special case of the multi-switch model where  $\tau_{\Delta}$  is very large (i.e., longer than the slowest first  
389 decision time).



390 The model comparison provides clear support for multiple switches. Fig. 6 shows the average  
391 response time for the decision reported first ( $RT_{1st}$ ), split by whether the first decision was color  
392 or motion, and grouped by either color or motion strength. Both the single- and multi-switch  
393 models provide a good explanation of the  $RT_{1st}$  when grouped as a function of the coherence of  
394 the decision that was reported first (Fig. 6, panels A and D). However, only the multi-switch model  
395 could explain the interaction between  $RT_{1st}$  and the coherence of  $D_{2nd}$  (Fig. 6B and C). The data  
396 shows that  $RT_{1st}$  is longer when  $D_{2nd}$  is more difficult, and this effect was well explained by the  
397 multi-switch model. Unlike what is seen in the data, the single-switch model predicts that  $RT_{1st}$   
398 should not vary with the coherence of  $D_{2nd}$  (as depicted by flat lines in panels B and D). Because  
399 we fit the models for each participant individually, we can analyze the frequency of alterations  
400 predicted by the model with multiple switches. For one of the participants, the best-fitting inter-  
401 switch interval was higher than the slowest decision time, and thus the model was no different  
402 from the single-switch model. For the other 7 participants, alternations were sparse: the average  
403 inter-switch interval was  $920 \pm 290$  ms (mean  $\pm$  s.e.m. across participants).

404 To summarize, the bimanual version of the double-decision task allowed us to infer not only  
405 that the two dimensions were addressed serially, but that people may alternate between both  
406 attributes of the stimulus in a time-multiplexed manner. The model suggests that alternations  
407 were sparse, as if the participants considered one decision for a few hundred milliseconds, and  
408 switched temporarily to the other decision if they found no conclusive evidence about the first.

### 409 **Double decision with binary response**

410 Up to now we have observed serial decision making when participants had to provide two answers—  
411 that is, four possible responses. A possible concern is that the reason we observed the serial pat-  
412 tern of double-decisions was that it required a quaternary response. We therefore designed a  
413 task that involves a double decision but only a binary choice. Two participants were asked to re-  
414 port whether the net direction in two patches of random dots were the same or different (Fig. 7A).  
415 The two motion stimuli were presented to the left and right of a central fixation cross Fig. 7A. The  
416 direction (up or down) and strength of motion were controlled independently in the two stimuli.

417 Both participants exhibited accuracy-RT functions that depended on the difficulty of both mo-  
418 tion stimuli. Fig. 7B shows proportion of correct choices plotted as a function of the coherences  
419 for both the 1D (up-down) and 2D (same-difference) trials. The RTs associated with same-different  
420 judgment were almost twice as long as the RTs from a 1D direction judgment. Part of this differ-  
421 ence might be attributed to the conversion from two direction judgments to the same-different  
422 response, but that should not depend on difficulty and it is hard to reconcile this with the magni-  
423 tude of the difference. Instead they suggest additive decision times. The horizontal red lines in  
424 Fig. 7B are fits to a drift diffusion model that assume the 2D same/different decision is formed  
425 from two 1D direction decisions. We constrained the fits to share the same sensitivity to motion  
426 strength (see Methods, Eq. 2).

427 To compare serial and parallel accounts of these extended reaction times, we used the same  
428 strategy as in *Figure 2-Figure Supplement 2* which attempts to account for the observed RT distri-  
429 butions as combinations of underlying 1D decision times and the non-decision time. This analysis  
430 provides strong support for the serial account (*Figure 7-Figure Supplement 1C*;  $BF > 10^7$  for both  
431 participants). Like the color-motion task, there is every reason to assume that the acquisition of  
432 evidence from the two patches of random dots occurs in parallel. Yet once again, the pattern of  
433 RTs supports serial incorporation into the double decision. The use of a binary response in the  
434 same-different task also rules out the possibility that the long decision time in our 2D experiments  
435 are explained by the doubling of alternatives (Hick's law; *Hick 1952; Luce 1986; Usher et al. 2002*).

### 436 **Parallel acquisition with serial incorporation model**

437 Taken together, the results from our five experiments suggest that the prolongation of RTs in dou-  
438 ble decisions is the result of serial integration of evidence during the decision-making process,

439 independent of the modality of choice implementation and number of response options. Paral-  
440 lel acquisition of the two sensory streams followed by serial incorporation into decision variables  
441 reconciles the findings of the short duration experiment with those of the double-decision RT ex-  
442 periment. The variable duration and bimanual experiments suggest that (i) parallel acquisition  
443 and serial incorporation is not limited to the short duration experiment and (ii) serial alternation  
444 of color and motion can occur before one process terminates. Here we attempt to incorporate  
445 these features into a common framework intended to illuminate how this might work in terms  
446 that relate to the neurobiology of perceptual decision making. We will proceed by illustrating the  
447 steps that underlie the acquisition of evidence samples, their temporary storage in buffers, and  
448 their incorporation into the decision variables that govern choice and the two decision times. We  
449 first make the case for the buffer using a simulated trial from the short duration experiment. We  
450 then elaborate the diagram to account for the serial pattern of decision times when the stimulus  
451 duration is longer.

452 Consider the example in Fig. 8A of a process leading to a decision in the short duration task.  
453 Suppose that visual processing of the 120 ms motion stream gives rise to a single sample of evi-  
454 dence that captures the information from the brief pulse, and the same is true for the color stream.  
455 These samples of evidence are acquired in parallel and placed in buffers, where they can be stored  
456 temporarily. The values in these buffers may be thought of as latent instructions to a cortical cir-  
457 cuit to update a decision variable ( $V_m$  or  $V_c$ ) by some amount ( $\Delta V_m$  and  $\Delta V_c$ ). While the samples  
458 can be acquired simultaneously, only one sample can update the corresponding decision variable  
459 at a time. This is the bottleneck. One of the samples must be held (buffered) until the other up-  
460 date operation has cleared. If motion is the first to be updated, then  $V_c$  cannot be updated until  
461 the circuit receiving the motion-update instruction has received it (green arrow). This takes some  
462 amount of time,  $\tau_{ins}$  (for **instruct**). The update instruction is realized by an integrator with a time  
463 constant ( $\tau_v = 40$  ms) leading to slow cortical dynamics (red and blue traces).

464 In this example, each buffer receives all the information available in the stimulus. Were there  
465 additional samples in the stimulus, the motion buffer would be ready to receive another sample  
466 when it sends its content, whereas the color buffer cannot be updated until it is cleared,  $\tau_{ins}$  later.  
467 The bottleneck is between the buffer and the update of the decision variable, more specifically,  
468 the initiation of the dynamic process that implements this update in a cortical circuit. In this case  
469 there is no consequence beyond a delay, because there is no more evidence from the stimulus  
470 after 120 ms.

471 Fig. 8B elaborates the diagram in panel A using another trial from the short duration experiment.  
472 We now represent the transformation of sensory data to evidentiary samples by applying a stage  
473 of signal processing to the raw luminance and color data,  $L(x, y, t)$  and  $C(x, y, t)$ . These functions are  
474 just shorthand for the noisy spatiotemporal displays. The motion filter is meant to capture the im-  
475 pulse response of direction selective simple and complex cells in the visual cortex (*Movshon et al.,*  
476 *1978b,a; Adelson and Bergen, 1985; Britten et al., 1993; DeAngelis et al., 1993*), and we assume  
477 a similar operation on the stimulus color stream. They are also shorthand for a difference signal,  
478 such as right minus left and blue minus yellow. The filtering introduces a delay and a smearing  
479 of these streams. While the motion filters must sample the  $L(x, y, t)$  at rates sufficient to support  
480 the extraction of fast fluctuations and fine spatial displacement, the neurons ultimately pool these  
481 signals nonlinearly over space and time (*Britten et al., 1993; Zylberberg et al., 2016*). These are  
482 the signals represented by the maroon filter traces in the Fig. 8B. This is the convolution of  $L(x, y, t)$   
483 and the function in Fig. 3B (bottom). The same filter is applied to  $C(x, y, t)$  to make the filtered color  
484 traces (blue). Importantly, for purposes of integrating the information in the color-motion random  
485 dot displays, 11 Hz sampling ( $\tau_s = 90$  ms) is sufficient. Notice that the filtered representation lasts  
486 longer than the stimulus. Therefore, in this case the decision is based on at least two samples of  
487 evidence per sensory stream.

488 The buffers acquire their first samples at  $\tau_s = 90$  ms (Fig. 8B, arrows ① & ①) The motion buffer  
489 is cleared as soon as it is acquired (arrow ②) and thus begins to impact  $V_m$  90 ms later (i.e.,  $\tau_{ins}$ ).

490 We set  $\tau_{\text{ins}} = 90$  ms mainly to simplify the figure (but see below). Thus it is only at  $t = 180$  ms  
491 (i.e.,  $\tau_s + \tau_{\text{ins}}$ ) that the instruction arrives to update  $V_m$ . This unblocks the bottleneck (③), thereby  
492 allowing the first color sample to be cleared from its buffer (open rectangle, ④). This permits ac-  
493 quisition of a second color sample (③ and filled blue rectangle,  $t = 180$  ms). Notice that the second  
494 motion sample is also acquired at  $t = 180$  ms, that is,  $\tau_s$  after the first acquisition (and its immediate  
495 clearance). The first color sample instructs  $V_c$   $\tau_{\text{ins}}$  after it was cleared ( $t = 270$  ms), which unblocks  
496 the bottleneck (⑤). Because we are assuming alternation in this example, this leads to the second  
497 update of  $V_m$  (⑥). With the motion buffer available, it would be possible to obtain a third sample  
498 from the motion stream at  $t = 270$  ms, but the filtered signal has decayed to zero, and we assume  
499 extinction of the stimulus is registered by the brain by this time to terminate sampling. Upon re-  
500 ceipt of  $\Delta V_m$ , the bottleneck is lifted ( $t = 360$  ms; ⑦) and the second color sample is cleared from its  
501 buffer ( $t = 360$  ms) to instruct  $V_c$  (⑧). There is no signal left to integrate, and the decision is made  
502 based on the signs of  $V_m$  and  $V_c$ . Thus the decision is based on simultaneous (parallel) acquisition  
503 of two samples of evidence, which are incorporated serially into their respective decision variables.

504 The exercise helps us appreciate how a stream of evidence lasting only 120 ms could lead to a  
505 double-decision 400-600 ms later (Fig. 3A). It also illustrates the compatibility of parallel acquisition  
506 and serial incorporation into the decisions, and it suggests that serial processing is imposed at the  
507 step between buffered samples and incorporation into the decision variables. This is the “response  
508 selection” bottleneck hypothesized by Harold Pashler (1994) and others (e.g., *Marti et al. 2012*; see  
509 Discussion).

510 The idea extends naturally to double-decisions that are extended in time. Fig. 8C illustrates a  
511 simulated double-decision in a free response task. The double-decision is made once both deci-  
512 sion variables reach their terminating bounds. The example follows the same initial steps as the  
513 short duration experiment, except that when the 2<sup>nd</sup> motion and color samples are cleared from  
514 their respective buffers, they are replaced with a 3<sup>rd</sup> sample. Notice that beginning with the third  
515 motion sample, the interval to the next sample has doubled (180 ms), because the example posits  
516 regular alternation (for purposes of illustration only; see below). This longer interval begins  
517 with the 2<sup>nd</sup> sample. From that point forward, until the color decision terminates, the streams are ef-  
518 fectively undersampled. Decision processes ignore approximately half of the evidence supplied  
519 by the stimulus. This is because both streams supply independent samples of evidence at a rate  
520 greater than 5.5 Hz (i.e., an interval of 180 ms).

521 In the example, it is  $V_c$  that reaches the bound first ( $T_c \approx 1.4$  s; ⑨). There may be no overt  
522 behavior associated with this terminating event, as in the eye and unimanual reaching tasks, but  
523 direct evidence for this termination is adduced from the bimanual reaching task.

524 From this point forward the processing is devoted solely to motion until it terminates at a neg-  
525 ative value of  $V_m$  (⑩). Notice that when the bottleneck clears, there is always a buffered sample  
526 ready to be cleared, and this occurs at intervals of  $\tau_{\text{ins}} = \tau_s = 90$  ms. The process is now as effi-  
527 cient as a single decision process. Indeed, a simple 1D decision about motion (or color) is likely to  
528 involve the same instruction delays and bottleneck. If  $\tau_s = \tau_{\text{ins}}$ , then like the first sample of motion,  
529 all subsequent samples of motion could pass immediately from the buffer to update  $V_m$  without  
530 loss of information. The model is thus a variant of standard symmetrically bounded random walk  
531 or drift-diffusion (*Laming, 1968; Link, 1975; Ratcliff, 1978; Shadlen et al., 2006; Ratcliff and Rouder,*  
532 *1998; Palmer et al., 2005*). It is compatible with the long time it takes for visual evidence to impact  
533 the representation of the decision variable in cortical areas like the FEF and LIP (e.g., ~180 ms).

534 The diagrams in Fig. 8 are intended for didactic purposes, to lay out the need for a buffer and the  
535 seriality imposed by a bottleneck between the buffer and the update of the DV in circuits associated  
536 with working memory. The values for the delays and time constants ( $\tau_x$  terms) were chosen mainly  
537 to simplify an already complex diagram, and the same holds for the assumption of strict alternation.  
538 The logic does not change if the serial processing were to involve many updates of color or motion  
539 before switching to the other dimension. The important assumption is that it takes time to update  
540 a decision variable, and during this update there is a bottleneck that precludes another update.

541 Importantly, whether alternating, as in Fig. 8C, or starting one process after completing the other,  
542 there is a period of time in which information in the sensory stream is not affecting one of the  
543 decisions. This loss is apparent in the additivity of decision times, but it leads to no interference  
544 in accuracy in the RT task, because the termination criterion has not changed, and this (and the  
545 stimulus strength) determines accuracy. This is the insight that led to the prediction that under  
546 certain conditions in which the experimenter controls the duration of the color-motion display,  
547 there ought to be interference between color and motion sensitivity (Fig. 4).

## 548 Discussion

549 In one sense the present study extends the framework of bounded evidence accumulation to more  
550 complex decisions composed of the conjunction of two decisions about two distinct features. In  
551 another more important sense, the findings highlight a bottleneck in information processing that  
552 touches on the very speed of thought. The experimental findings demonstrate that a double-  
553 decision about the dominant color and direction of motion of a patch of random dots is formed  
554 serially. This is surprising, because color and motion are canonical examples of parallel visual path-  
555 ways from the retina through the visual and extrastriate visual association cortex, and there are  
556 compelling demonstrations of this parallel processing on conscious perception (*Carney et al., 1987*;  
557 *Cavanagh et al., 1984, 1985*). Indeed we confirmed that the color and motion information in the  
558 random dot stimulus used here was acquired in parallel. The stimulus was designed to minimize  
559 interference or competition for spatial attention. It was restricted to a small aperture in the center  
560 of the visual field, and the same individual dots supply the motion and color information. It seems  
561 fair to say that the deck was stacked in favor of parallel processing.

562 Indeed with one notable exception, there was not a hint of an interaction between color or  
563 motion on choice performance in our experiments. That is, changing the difficulty of one dimen-  
564 sion, say color, did not affect the perceptual accuracy—or more precisely, sensitivity—to the other  
565 dimension, say motion. This held over a wide range of difficulties spanning chance to perfect per-  
566 formance. The one exception was when we controlled viewing duration (Fig. 4) and this turns out  
567 to be explained by a competition of the two streams for processing time, not by an interaction af-  
568 fecting the fidelity of the sensory streams themselves. Had we attended solely to the choice data,  
569 we would have likely concluded that the motion and color decisions were formed in parallel, con-  
570 sistent with 40 years of vision science (*Livingstone and Hubel, 1988; Ramachandran and Gregory,*  
571 *1978*).

572 Evidence for seriality of the decision process is adduced mainly from the pattern of double-  
573 decision reaction times. The RT is the time from the onset of the color-motion stimulus to the initi-  
574 ation of the movement used to indicate the decision: the sum of the time it takes to complete the  
575 double decision, plus time delays that are not affected by task difficulty, termed the non-decision  
576 time ( $T_{nd}$ ). If the color and motion decisions are made in parallel, then the double-decision time  
577 is the larger of the two decision times,  $\max[T_m, T_c]$ . If the decisions are made serially, the double-  
578 decision time is the sum,  $T_m + T_c$ . We focused on *max* vs. *sum* distinction using a combination of  
579 fitting and prediction. The simplest approach relies only on fits of the double-decision RT distribu-  
580 tions (*Figure 2–Figure Supplement 2*) derived from a smaller set of latent 1D decision-time distribu-  
581 tions under the appropriate operations for parallel and serial combination (Eq. 7 and convolution,  
582 respectively). We found this method the most robustly identifiable—that is, it almost always favors  
583 the appropriate generating model—and it is sufficiently powerful to apply to the smaller data sets  
584 from individual participants. It reveals “decisive” support (*Kass and Raftery, 1995*) for seriality in  
585 all but one of the 11 participants (*Figure 2–Figure Supplement 3*). A drawback of the approach is  
586 that it does not constrain the relationship between choice accuracy and decision time. For this we  
587 used a variety of bounded drift-diffusion models. These are the fits shown in Fig. 2. Here too, we  
588 attempted to contrast the *max* and *sum* logic by predicting the RT distribution for the majority of  
589 conditions. We fit the choice-RT data from the subset of conditions in which at least one of the stim-  
590 ulus dimensions was at its strongest level. The fits, under the *max* or *sum* rule, supply the marginal

591 1D distributions used to predict the RT of the remaining conditions, through application of the  
592 same rule. This approach also provides decisive support for the serial model (see *Figure 2–Figure*  
593 *Supplement 1*).

594 The strong support for serial processing does not specify where in the processing chain the se-  
595 riality arises. The answer to this question resolves the apparent contradiction with vision science,  
596 and highlights a connection with a body of literature from psychology that addresses the topic of  
597 dual task interference, more specifically the psychological refractory period. The key is the short  
598 and variable duration experiments (Figs. 3 and 4). If seriality were imposed at the level of sensory  
599 acquisition, then when both color and motion are difficult, accuracy on one dimension should come  
600 at the expense of accuracy on the other, on average. We did not observe this at short durations,  
601 and not for lack of power, as made clear by the interference that was detected at intermediate du-  
602 rations. Nor did we observe any reduction in accuracy compared to single decisions, and there was  
603 no difference in the magnitude and time course over which momentary fluctuations of color and  
604 motion predicted the individual choices on single- and double-decisions (Fig. 3B). These observa-  
605 tion also rule out the possibility that there was interference but it was balanced across trials—that  
606 is, a mixture of trials in which successful motion processing impaired color processing on half the  
607 trials and successful color processing impaired motion processing on the other half.

608 If color and motion information are incorporated into the decision serially in the short duration  
609 experiment, then there must be a mechanism to store the evidence from at least one of the pro-  
610 cesses while the other is incorporated into the decision. We refer to this temporary storage as a  
611 buffer. There are several reasons to believe that incorporation is serial. First, the response times  
612 were longer in the double-decision task than in the single decision task, but the extra time was not  
613 associated with improved accuracy on either dimension. Second, the finding was replicated in the  
614 variable duration task, which revealed interference of motion on color at intermediate durations,  
615 consistent with a serial account.

616 Thus the short duration experiment demonstrates parallel processing and the necessity of at  
617 least one buffer. The results in the variable duration experiment might lead us to entertain the  
618 possibility that only color is buffered, because motion was prioritized. However, the bimanual task  
619 demonstrates that motion is not always processed first, and both color and motion are processed  
620 before the first process terminates. We therefore conclude that there are two buffers which are  
621 capable of holding a sample of evidence about color or motion, respectively, while the other dimen-  
622 sion is incorporated into the decision. This places the bottleneck between the buffered evidence  
623 and the representation of the decision variable. We believe the bottleneck arises because of an  
624 anatomical constraint. It is simply impossible to connect in parallel every possible source of evi-  
625 dence with the neural circuits responsible for representing a proposition or plan. As *Zylberberg*  
626 *et al. (2010)* theorized, the brain's routing problem holds the key to why many mental operations  
627 operate serially. We will return to this idea after interpreting our results in the context of the neu-  
628 robiology of decision making. We do this by pursuing the neural correlates of a computational  
629 model that supports parallel acquisition of sensory evidence and its serial incorporation into two  
630 decisions.

631 The double decision is formed by two decision processes representing the accumulation of  
632 samples of evidence bearing on the dominant color or the dominant direction of motion. Their  
633 only interaction is through a competition for access to evidentiary samples, which cannot be sup-  
634 plied to both decision processes at the same time, hence the bottleneck. If one process terminates  
635 the other carries on from that time with unfettered access to its momentary evidence. For visual  
636 perceptual decisions, parallel acquisition is identified with central visual pathways in the primary  
637 and extrastriate cortex. The representation of decision variables is identified with parietal and pre-  
638 frontal cortical areas and with neurons that exhibit long time scales to support the representation  
639 of working memory, planning, and the integration of positive and negative inputs as a function of  
640 time. The operations depicted in Fig. 8 are intended to reconcile what is known about the neuro-  
641 biology of simple 1D decisions with the constraints introduced by the double-decision task. The



642 mathematical instantiation of the model requires only minor modifications of two bounded drift-  
643 diffusion processes with temporal multiplexing (see Methods). However the architecture implied  
644 by Fig. 8B & C facilitate interpretation of the experimental findings in relation to neural processing.

645 In the mathematical depiction of drift-diffusion, the momentary evidence is a biased Wiener  
646 process. However, in reality the stimulus is not a Wiener process, nor is the representation of  
647 momentary evidence by neurons (Zylberberg *et al.*, 2016), which arise through application of a  
648 transfer function that effectively spreads the impact of a pair of displaced dots over 100-150 ms  
649 (Fig. 3B, bottom; Adelson and Bergen (1985)). Thus the neural representation of the motion can  
650 be approximated by a process of leaky integration (Cain *et al.*, 2013; Barlow and Tripathy, 1997).  
651 Such smoothing would not be warranted for the detection of fast changes, but it is adequate for  
652 a signal that is to be integrated over time. We know less about the filtration of a color difference,  
653 but the same logic applies. The conceptual transition from Wiener processes to discrete samples  
654 allows us to appreciate the similarity between the accumulation of evidence from movie-like stimuli  
655 and the broader class of decisions based on discrete samples of evidence from the environment  
656 and memory. This informs hypotheses about the neurobiology, because the sample of evidence  
657 ultimately bears on a decision in units of belief or relative value. That is obvious when considering  
658 a choice between items on a menu, but it has been camouflaged to some extent in the perceptual  
659 decision-making literature. This is in part because the time-integral of a difference in firing rates  
660 from right- and left-preferring neurons is the number of excess spikes for right, which is itself  
661 proportional to the accumulated logLR that this excess was observed because motion was in fact  
662 rightward (Gold and Shadlen, 2001; Shadlen *et al.*, 2006). For the wider class of decisions, such  
663 difference variables are elusive, whereas the possibility of associating a sample with log-likelihood  
664 is a natural dividend of learning and memory (Yang and Shadlen, 2007; Kira *et al.*, 2015; Shadlen  
665 and Shohamy, 2016).

666 The results imply the maintenance of separate decision variables each capable of reconciling  
667 decision and choice for the one stimulus dimension. We will consider variations and alternatives  
668 below, but there must be separate control of termination and negligible cross talk. Specifically, the  
669 state of the accumulated evidence bearing on the direction of motion does not affect the amount  
670 of accumulated evidence required to reach a decision about color dominance, and the same can  
671 be said about the state of the accumulated evidence about color on the decision about direction  
672 of motion. In the model the decision variables,  $V_m$  and  $V_c$ , represent the integrated evidence for  
673 right (and against left) and for blue (and against yellow). Neural correlates of these 1D processes  
674 are known, mainly in the parietal and prefrontal cortex (Gold and Shadlen, 2007), although they  
675 are organized in pairs:  $R-L$ ,  $L-R$  (and presumably  $B-Y$  and  $Y-B$ ). Each of the four processes is  
676 the accumulation of positive and negative increments, and each is terminated by an upper bound.  
677 Because evidence for  $R$  and  $L$  are anticorrelated (likewise for  $B$  and  $Y$ ), the pair of opposing pro-  
678 cesses is approximated by 1D drift-diffusion to symmetric upper and lower terminating bounds.  
679 All model-fits adopt this approximation.

680 An alternative formulation, which we term target-wise integration, would accumulate evidence  
681 for the pair of features associated with each choice target (e.g.,  $RB$ ,  $RY$ ,  $LB$ ,  $LY$ ). If such mechanism  
682 were to terminate when the total accumulation reaches a threshold, it would predict a type of  
683 choice-interference such that sensitivity to motion, say, would be impaired when the color strength  
684 was high, because the decision time is shortened by the stronger stimulus. We have not pursued all  
685 variants of target-wise integration, but critically, the bimanual experiment demonstrates that the  
686 double decision comprises two terminating events. There may well be neurons that represent the  
687 target-wise accumulation of evidence, but they would require additional mechanisms that process  
688 color and motion until the first decision terminates. At that time, a threshold could be applied to  
689 the target-wise accumulators at a level equal to the sum of the color and motion thresholds, and  
690 only the unfinished dimension contributes to the decision. A solution of this type seems a likely  
691 possibility in areas of the brain that represent the decision variable as an evolving plan of action.

692 We find it useful to characterize integration as the implementation of a sequence of instruc-

693 tions to increment and decrement persistent activity in cortical areas that represent the decision  
694 variables. In Fig. 8, the instructed change is realized by simple 1st order dynamics chosen to ap-  
695 proximate neural responses from area LIP. The implementation is merely phenomenological, but it  
696 jibes with emerging ideas in theoretical neuroscience that characterize computation as a change in  
697 circuit configuration to establish stable states and dynamics (*Remington et al., 2018*). For decision  
698 making, it replaces the requirement for continuous integration, with the realization of instructions  
699 as if drawn from a memory stage. This characterization also extends to the buffer.

700 Recall, the buffer was introduced to explain the observation that a brief pulse of color-motion,  
701 acquired in parallel, appears to be incorporated into the decision serially. We characterized the  
702 length of the buffer—its storage capacity—using the data from the variable duration experiment  
703 Fig. 4, where we equate it with the duration of parallel acquisition. This is reasonable because  
704 thereafter, the process is serial. However, this depiction appears to limit the role of the buffer  
705 to the beginning of the decision, and it fails to specify how long the information can be held. If  
706 there are alternations between color and motion processing before the first process terminates,  
707 as shown in Fig. 6, then information might be buffered beyond the initial parallel phase. As shown  
708 in Fig. 8C, during alternation a sample might be held for at least  $2\tau_{\text{ins}}$ —that is, the time it takes  
709 the cleared sample to instruct the appropriate decision process and the time the bottleneck is  
710 in play while the other dimension performs its update. If the alternations are less frequent, the  
711 buffer might need to hold information longer, and if there is only one transition, then the buffer  
712 might be expected hold a sample of information for the duration of the entire first decision. There  
713 is presumably a limit on how long a sample can be stored, but studies of visual iconic memory  
714 suggest that a sample of evidence might be buffered for  $\sim 500$  ms (*Sperling, 1960; Gegenfurtner*  
715 *and Kiper, 1992*).

716 We conceive of the buffer residing between the cortical areas that represent the filtered evi-  
717 dence and other cortical circuits that represent the decision variables. Notice that the operations  
718 depicted in Fig. 8 assign two duties to the buffer: (i) storage of a sample of evidence while the  
719 bottleneck precludes updating the associated decision variable and (ii) conversion of the sample  
720 into an instruction to update a decision variable by  $\Delta V$ . These duties could be carried out by dif-  
721 ferent circuits. An appealing candidate for both operations is the striatum. The striatum receives  
722 input from the extrastriate visual cortex (*Ding and Gold, 2012a*), and it is known to play a role in  
723 connecting value to action selection (*Hikosaka et al., 2014*) as well as working memory (*Akhlagh-*  
724 *pour et al., 2016*). In the context of our results, we would characterize the operation as follows. A  
725 sample of filtered evidence, represented by the firing rates of neurons in extrastriate cortex (e.g.,  
726 areas MT/MST) leads to a change in the state of a striatal circuit, such that its reactivation trans-  
727 mits the  $\Delta V$  instruction to the cortical areas that represent the decision variables, and this takes  
728 time ( $\tau_{\text{ins}}$ ). On this view, the bottleneck is the striato-thalamo-cortical pathway. There has been an  
729 observation of the bottleneck in a split-brain patient, supporting such a subcortical bottleneck at  
730 least in certain instances (*Pashler et al., 1994*).

731 A second possibility is that the buffered evidence is stored in visual cortical association areas,  
732 especially areas with persistent representations. For example, it has been suggested that short  
733 term visual iconic memory is supported by the slowly decaying spike rates of neurons in area V2  
734 (*O'Herron and von der Heydt, 2009*) and the anterior superior temporal sulcus (STSa) (*Keyser et al.,*  
735 *2005*). This would place the bottleneck between extrastriate cortex and the parietal and prefrontal  
736 areas that represent the decision variable (see also *Marti et al. 2012*). This possibility does not  
737 provide an explanation for why communication between these areas would impose a substantial  
738 delay (e.g.,  $\tau_{\text{ins}}$ ).

739 A third possibility would identify the buffer with control circuitry within the very cortical areas  
740 that represent the decision variables. This might seem far-fetched but there is evidence for such  
741 an operation in the premotor cortex of mice, where it underlies the implementation of the logical  
742 'exclusive or' (XOR) operation (*Wu et al., 2020*). In that case the bottleneck would be intracortical. It  
743 would correspond to the implementation of a circuit state from its "silent" representation—that is,

744 in cellular and subcellular (e.g., synaptic) states rather than persistent spike activity. The bottleneck  
745 is the conversion from this state to the establishment of the spiking dynamics that instantiate the  
746  $\Delta V$  instruction. This might resemble the recall of an associative memory, which must facilitate the  
747 establishment of cortical persistent activity in a state suitable for computation, be it for further  
748 updating or comparison to a criterion. The three possibilities are not mutually exclusive; nor are  
749 they exhaustive. In any case, the instigating event is the clearance of the bottleneck, signaled by  
750 the circuit that receives the  $\Delta V$  instruction.

751 This brings us to the bottleneck itself. Up to now we have alluded to the bottleneck as a tempo-  
752 rary obstruction to color or motion processing, but the bottleneck itself does not add time. It  
753 is the instructive step that takes time ( $\tau_{\text{ins}}$ ). This step comprises the conversion of a sample of  
754 evidence to a  $\Delta V$  instruction and its transmission to a cortical circuit. Indeed, the same delay is  
755 encountered in simpler decisions. For example, in the 1D random dot motion task, the incorpora-  
756 tion of evidence into the neural representation of the decision variable is first evident  $\sim 180$  ms  
757 after direction neurons in area MT exhibit direction selective responses (*De Lafuente et al., 2015*;  
758 *Ding and Gold, 2012b*; *Kim and Shadlen, 1999*) and this delay holds for perturbations of the stimu-  
759 lus throughout decision formation (*Huk and Shadlen, 2005*). This is too long to be explained by  
760 synaptic latencies. It implies either a complex routing through intermediate structures or more  
761 sophisticated processing that serves to facilitate the linkage and/or the conversion of the sample  
762 to an instruction suitable for establishing the cortical dynamics that ultimately realize the  $\Delta V$  in-  
763 struction. The delay corresponds to the sum,  $\tau_s + \tau_{\text{ins}}$ , (circles 1 and 2 in Fig. 8).

764 Decision variables are represented in the persistent activity of neurons in the parietal and pre-  
765 frontal cortex of primates. Such persistent activity is associated with working memory, attention  
766 and planning. This functional localization conforms to the notion of a “response selection” bottle-  
767 neck hypothesized by Harold Pashler to explain dual task interference (*Pashler, 1994*), in particular  
768 a phenomenon known as the psychological refractory period (PRP): the prolonged latency of the  
769 second of two adjacent decisions without an effect on accuracy. In his and our formulation, it re-  
770 flects a limitation that restricts the flow of information to affect higher processes such as decision-  
771 making and short-term working memory. On initial consideration, there is no obvious reason why  
772 the formation of working memory should necessitate a bottleneck. If acquisition can be parallel,  
773 why not working memory? equivalently, the formation of a provisional plan or intention.

774 Framed in the language of decision-making, seriality arises as a consequence of limited con-  
775 nectivity between the brain’s evidence acquisition systems—sensory, memory, and emotion—and  
776 the systems that represent information in an intentional frame of reference, that is, as provisional  
777 affordances. Any possible intention might be informed by a variety of sources of evidence, which  
778 may be acquired in parallel but from different locations in the brain. The brain lacks the anatomy  
779 to support independent connections from all sources of evidence to all possible intentions—that  
780 is, the circuits that represent them. Instead the communication must share connections, and this  
781 invites some form of time-slice multiplexing. It is not possible for every source of evidence to  
782 communicate with the circuits that form decisions at the same time. For some dedicated opera-  
783 tions, it is likely that many sources of “evidence” do converge on the same intentional circuitry (e.g.,  
784 escape response; *Evans et al. 2018*; *Lee et al. 2020*), and the tracts can be established through  
785 development. But, for flexible cognitive systems that learn and solve problems, the connections  
786 between evidence and intention must be multipotent and malleable, since connecting  $N$  sources  
787 of evidence and  $M$  intentions will need at least  $N \times M$  wires if they are connected exhaustively,  
788 whereas if they are routed centrally, it will only need  $N + M$ . This solution necessitates some type  
789 of multiplexing (*Zylberberg et al., 2010*).

790 We suspect that the constraints leading to serial processing in the color-motion task also apply  
791 to other decisions and cognitive functions. For example, deciding between two familiar food items  
792 can take a surprisingly long time when those items are valued similarly. This holds when the items  
793 are both highly valued or both undesired or both of moderate value. Like decisions about the  
794 direction of random dot motion, there is a lawful relationship between the RT to choose an item

795 and the likelihood that the preference is consistent with one's previously stated value (*Krajbich*  
796 *et al., 2010; Krajbich and Rangel, 2011*). Like the choice-RT accompanying 1D motion (or color) de-  
797 cisions, the relationship suggests that some type of process like noisy evidence accumulation—or  
798 more generally, sequential sampling with optional stopping—reconciles choice and decision time.  
799 However, such expressions of preference differ from perceptual decisions in two important ways.  
800 First, there is no objectively correct response, only consistency with the sign of the inequality in  
801 the decision-maker's valuations of the individual items, which are ascertained before the experi-  
802 ment. Second, the food items are not shown as a movie and there is no uncertainty about their  
803 identity. Therefore it is not clear what gives rise to independent samples of evidence. Bakkour et al  
804 (2019) showed that the samples are likely to arise through constructive processes using hippocam-  
805 pal memory systems. This begs the question why this process would unfold in time like a movie  
806 of random dots. An attractive idea is that the use of memory guided valuation—in particular the  
807 step to enable it to affect a decision variable—encounters a bottleneck. Even if memories could  
808 be retrieved in parallel, they would require buffering and serial updates of the decision variable  
809 (*Shadlen and Shohamy, 2016*).

810 While it is unsurprising that a movie of random dots supplies evidence to be incorporated se-  
811 rially toward a decision, it is shocking that two samples of evidence, supplied simultaneously by  
812 the same dots and acquired through parallel sensory channels, do not support simultaneous de-  
813 cisions. In the experiments that require prolonged viewing, non-simultaneity manifests in serial  
814 time-multiplexed alternation of the decision processes and the failure to incorporate all informa-  
815 tion in the stimulus stream into one or both decisions. In a free response design the decision maker  
816 compensates by acquiring more evidence, so the interference is not apparent in the accuracy of  
817 the perceptual choice. However, if such compensation is precluded by the experimenter (variable  
818 duration experiment), the failure to incorporate information can affect accuracy too. That this  
819 bottleneck arises despite parallel acquisition of color and motion (or motion from two locations),  
820 whether we use one or two effectors to express the decision, and whether we decide between  
821  $2 \times 2$  conjunctions or two categories (same/different) suggests that the bottleneck is pervasive. In  
822 addition to the PRP, we suspect that it plays a role in other psychological phenomena, such as  
823 post-stimulus masking, iconic memory, the attentional blink, rapid sequential visual processing,  
824 and conjunction search. These phenomena represent forms of sequential interference and all can  
825 be stated as challenges to the brain's routing system (*Zylberberg et al., 2010*).

826 On the other hand, one must wonder if the brain can ever take advantage of parallel acquisition  
827 to perform cognitive functions in parallel. It certainly seems so to a musician using their feet and  
828 hands to convey time and sonority on a piano or counter rhythms on a drum kit. Yet the time scales  
829 of alternation discussed in this paper are on the order of 10 Hz. It seems possible that we achieve  
830 parallel processing despite the bottleneck by enhancing signal-processing at the filter stage before  
831 the bottleneck and by grouping (or chunking) processes after the bottleneck in higher order con-  
832 trollers of movement and strategy. For example, face selective neurons compute conjunctions of  
833 features in less than 100 ms. This is just one example of the sophisticated properties of association  
834 sensory neurons in the extrastriate visual cortex, and analogous operations are presumed to oc-  
835 cur in secondary somatosensory cortex and belt regions of the auditory cortex. Similarly, complex  
836 movement sequences and the rules to coordinate them may be specified in premotor cortex or at  
837 the level of the controller. If so, then the only way to overcome the bottleneck is to develop the  
838 expertise of the reader or the musician/athlete, leaving most of flexible cognition to negotiate the  
839 bottleneck between the acquisition of information and its incorporation into representations that  
840 support states of knowledge: decisions, working memory, plans of action. It is the price the brain  
841 pays to use its senses (and memory) to bear on a plethora of possible intentions, despite its limited  
842 connectivity. The payment is in time, but in another sense, it is time well spent, for without seriality  
843 of thought there is no contour to our experiences, no appreciation of cause and consequence, no  
844 meaning or narrative.

845 **Acknowledgments**

846 We thank Daphna Shohamy and Mariano Sigman for contributions to the theoretical underpin-  
847 nings of our study, and we thank Stanislas Dehaene, Gabriel Stine, Naomi Odean, and Aniruddha  
848 Das for comments on an earlier draft of the manuscript.



## References

- 849  
850 **Acerbi L**, Ma WJ. Practical Bayesian optimization for model fitting with Bayesian adaptive direct search. In:  
851 *Advances in neural information processing systems*; 2017. p. 1836–1846.
- 852 **Adelson E**, Bergen J. Spatiotemporal energy models for the perception of motion. *J Opt Soc Am A*. 1985;  
853 2:284–299.
- 854 **Akhlaghpour H**, Wiskerke J, Choi JY, Taliaferro JP, Au J, Witten IB. Dissociated sequential activity and stimulus  
855 encoding in the dorsomedial striatum during spatial working memory. *Elife*. 2016; 5:e19507.
- 856 **Bakkour A**, Palombo D, Zylberberg A, Kang Y, Reid A, Verfaellie M, Shadlen M, Shohamy D. The hippocampus  
857 supports deliberation during value-based decisions. *Elife*. 2019; 8.
- 858 **Barlow H**, Tripathy SP. Correspondence noise and signal pooling in the detection of coherent visual motion.  
859 *Journal of Neuroscience*. 1997; 17(20):7954–7966.
- 860 **Beard BL**, Ahumada AJ. Technique to extract relevant image features for visual tasks. In: *Human vision and*  
861 *electronic imaging III*, vol. 3299 International Society for Optics and Photonics; 1998. p. 79–85.
- 862 **Bogacz R**, Usher M, Zhang J, McClelland J. Extending a biologically inspired model of choice: multi-  
863 alternatives, nonlinearity and value-based multidimensional choice. *Philos Trans R Soc Lond B Biol Sci*. 2007;  
864 362(1485):1655–1670.
- 865 **Brainard D**. The Psychophysics Toolbox. *Spat Vis*. 1997; 10(4):433–436.
- 866 **Britten K**, Shadlen M, Newsome W, Movshon J. Responses of neurons in macaque MT to stochastic motion  
867 signals. *Vis Neurosci*. 1993; 10(6):1157–1169.
- 868 **Cain N**, Barreiro A, Shadlen M, Shea-Brown E. Neural integrators for decision making: a favorable tradeoff  
869 between robustness and sensitivity. *J Neurophysiol*. 2013; 109(10):2542–2559.
- 870 **Carney T**, Shadlen M, Switkes E. Parallel processing of motion and colour information. *Nature*. 1987;  
871 328(6131):647–649. doi: 10.1038/328647a0.
- 872 **Cavanagh P**, Boeglin J, Favreau OE. Perception of motion in equiluminous kinematograms. *Perception*. 1985;  
873 14(2):151–162.
- 874 **Cavanagh P**, Tyler CW, Favreau OE. Perceived velocity of moving chromatic gratings. *Journal of the Optical*  
875 *Society of America A, Optics and image science*. 1984 Aug; 1(8):893–899.
- 876 **Cavanagh P**, MacLeod DI, Anstis SM. Equiluminance: spatial and temporal factors and the contribution of  
877 blue-sensitive cones. *JOSA A*. 1987; 4(8):1428–1438.
- 878 **Chang J**, Cooper G. A practical difference scheme for Fokker-Planck equations. *Journal of Computational*  
879 *Physics*. 1970; 6(1):1–16.
- 880 **Churchland A**, Kiani R, Shadlen M. Decision-making with multiple alternatives. *Nat Neurosci*. 2008; 11(6):693–  
881 702.
- 882 **De Lafuente V**, Jazayeri M, Shadlen M. Representation of accumulating evidence for a decision in two parietal  
883 areas. *J Neurosci*. 2015; 35(10):4306–4318.
- 884 **De Leeuw JR**. jsPsych: A JavaScript library for creating behavioral experiments in a Web browser. *Behavior*  
885 *research methods*. 2015; 47(1):1–12.
- 886 **DeAngelis GC**, Ohzawa I, Freeman RD. Spatiotemporal organization of simple-cell receptive fields in the cat's  
887 striate cortex. I. General characteristics and postnatal development. *Journal of neurophysiology*. 1993 Apr;  
888 69(4):1091–1117.
- 889 **Ding L**, Gold J. Separate, causal roles of the caudate in saccadic choice and execution in a perceptual decision  
890 task. *Neuron*. 2012; 75(5):865–874.
- 891 **Ding L**, Gold JI. Neural correlates of perceptual decision making before, during, and after decision commitment  
892 in monkey frontal eye field. *Cerebral Cortex*. 2012; 22(5):1052–1067.
- 893 **Ditterich J**. A comparison between mechanisms of multi-alternative perceptual decision making: ability to  
894 explain human behavior, predictions for neurophysiology, and relationship with decision theory. *Frontiers*  
895 *in neuroscience*. 2010; 4:184.

- 896 **Drugowitsch J**, Moreno-Bote R, Churchland A, Shadlen M, Pouget A. The cost of accumulating evidence in  
897 perceptual decision making. *J Neurosci*. 2012; 32(11):3612–3628.
- 898 **Ernst M**, Banks M. Humans integrate visual and haptic information in a statistically optimal fashion. *Nature*.  
899 2002; 415(6870):429–433.
- 900 **Evans DA**, Stempel AV, Vale R, Ruelle S, Lefler Y, Branco T. A synaptic threshold mechanism for computing  
901 escape decisions. *Nature*. 2018; 558(7711):590–594.
- 902 **Fagot C**, Pashler H. Making two responses to a single object: Implications for the central attentional bot-  
903 tleneck. *Journal of Experimental Psychology: Human Perception and Performance*. 1992; 18(4):1058. doi:  
904 [10.1037/0096-1523.18.4.1058](https://doi.org/10.1037/0096-1523.18.4.1058).
- 905 **Gegenfurtner KR**, Kiper DC. Contrast detection in luminance and chromatic noise. *JOSA A*. 1992; 9(11):1880–  
906 1888.
- 907 **Gold J**, Shadlen M. Neural computations that underlie decisions about sensory stimuli. *Trends Cogn Sci*. 2001;  
908 5(1):10–16.
- 909 **Gold J**, Shadlen M. The neural basis of decision making. *Annu Rev Neurosci*. 2007; 30:535–574.
- 910 **Hanks T**, Mazurek M, Kiani R, Hopp E, Shadlen M. Elapsed decision time affects the weighting of prior probability  
911 in a perceptual decision task. *J Neurosci*. 2011; 31(17):6339–6352.
- 912 **Hick WE**. On the rate of gain of information. *Quarterly Journal of experimental psychology*. 1952; 4(1):11–26.
- 913 **Hikosaka O**, Kim HF, Yasuda M, Yamamoto S. Basal ganglia circuits for reward value-guided behavior. *Annual*  
914 *review of neuroscience*. 2014; 37:289–306.
- 915 **Howard I**, Ingram J, Wolpert D. A modular planar robotic manipulandum with end-point torque control. *J*  
916 *Neurosci Methods*. 2009; 181(2):199–211.
- 917 **Huk A**, Shadlen M. Neural activity in macaque parietal cortex reflects temporal integration of visual motion  
918 signals during perceptual decision making. *J Neurosci*. 2005; 25(45):10420–10436.
- 919 **Jacobs R**. Optimal integration of texture and motion cues to depth. *Vision Research*. 1999; 39(21):3621–3629.
- 920 **Kahneman D**. *Attention and effort*, vol. 1063. Citeseer; 1973.
- 921 **Kamienkowski JE**, Sigman M. Delays without mistakes: response time and error distributions in dual-task.  
922 *PLoS one*. 2008 Sep; 3(9):e3196.
- 923 **Kang Y**, Petzschner F, Wolpert D, Shadlen M. Piercing of Consciousness as a Threshold-Crossing Operation.  
924 *Curr Biol*. 2017; 27(15):2285–2295.e6.
- 925 **Kass R**, Raftery A. Bayes Factors. *Journal of the American Statistical Association*. 1995; 90(430):773–795.
- 926 **Keysers C**, Xiao DK, Földiák P, Perrett D. Out of sight but not out of mind: The neurophysiology of iconic  
927 memory in the superior temporal sulcus. *Cognitive Neuropsychology*. 2005; 22(3-4):316–332.
- 928 **Kiani R**, Corthell L, Shadlen M. Choice certainty is informed by both evidence and decision time. *Neuron*. 2014;  
929 84(6):1329–1342.
- 930 **Kiani R**, Hanks T, Shadlen M. Bounded integration in parietal cortex underlies decisions even when viewing  
931 duration is dictated by the environment. *J Neurosci*. 2008; 28(12):3017–3029.
- 932 **Kiani R**, Shadlen M. Representation of confidence associated with a decision by neurons in the parietal cortex.  
933 *Science*. 2009; 324(5928):759–764.
- 934 **Kim J**, Shadlen M. Neural correlates of a decision in the dorsolateral prefrontal cortex of the macaque. *Nature*  
935 *Neuroscience*. 1999; 2(2):176–185.
- 936 **Kingma DP**, Ba J. Adam: A Method for Stochastic Optimization. *arXiv*. 2014; .
- 937 **Kira S**, Yang T, Shadlen M. A neural implementation of Wald's sequential probability ratio test. *Neuron*. 2015;  
938 85(4):861–873.
- 939 **Knill D**, Pouget A. The Bayesian brain: the role of uncertainty in neural coding and computation. *Trends in*  
940 *Neurosciences*. 2004; 27(12):712–719.

- 941 **Krajbich I**, Armel C, Rangel A. Visual fixations and the computation and comparison of value in simple choice.  
942 *Nat Neurosci.* 2010; 13(10):1292–1298.
- 943 **Krajbich I**, Rangel A. Multialternative drift-diffusion model predicts the relationship between visual fixations  
944 and choice in value-based decisions. *Proceedings of the National Academy of Sciences.* 2011; 108(33):13852–  
945 13857.
- 946 **Laming D.** *Information theory of choice reaction time.* Wiley; 1968.
- 947 **Lee KH**, Tran A, Turan Z, Meister M. The sifting of visual information in the superior colliculus. *ELife.* 2020;  
948 9:e50678.
- 949 **Li Q**, Joo S, Yeatman J, Reinecke K. Controlling for Participants' Viewing Distance in Large-Scale, Psychophysical  
950 Online Experiments Using a Virtual Chinrest. *Sci Rep.* 2020; 10(1):904.
- 951 **Link S.** The relative judgment theory of two choice response time. *Journal of Mathematical Psychology.* 1975; .
- 952 **Livingstone M**, Hubel D. Segregation of form, color, movement, and depth: anatomy, physiology, and percep-  
953 tion. *Science.* 1988; 240(4853):740–749.
- 954 **Lorteije J**, Zylberberg A, Ouellette B, De Zeeuw C, Sigman M, Roelfsema P. The Formation of Hierarchical  
955 Decisions in the Visual Cortex. *Neuron.* 2015; 87(6):1344–1356.
- 956 **Luce D.** *Response Times: Their Role in Inferring Elementary Mental Organization.* Oxford University Press;  
957 1986.
- 958 **Mante V**, Sussillo D, Shenoy K, Newsome W. Context-dependent computation by recurrent dynamics in pre-  
959 frontal cortex. *Nature.* 2013; 503(7474):78–84.
- 960 **Marti S**, Sigman M, Dehaene S. A shared cortical bottleneck underlying Attentional Blink and Psychological  
961 Refractory Period. *Neuroimage.* 2012; 59(3):2883–2898.
- 962 **Movshon JA**, Thompson ID, Tolhurst DJ. Receptive field organization of complex cells in the cat's striate cortex.  
963 *The Journal of physiology.* 1978; 283(1):79–99.
- 964 **Movshon JA**, Thompson ID, Tolhurst DJ. Spatial summation in the receptive fields of simple cells in the cat's  
965 striate cortex. *The Journal of physiology.* 1978; 283(1):53–77.
- 966 **O'Herron P**, von der Heydt R. Short-term memory for figure-ground organization in the visual cortex. *Neuron.*  
967 2009; 61(5):801–809.
- 968 **Okazawa G**, Sha L, Purcell BA, Kiani R. Psychophysical reverse correlation reflects both sensory and decision-  
969 making processes. *Nature communications.* 2018 Aug; 9(1):1–16.
- 970 **van Opheusden B**, Acerbi L, Ma WJ. Unbiased and Efficient Log-Likelihood Estimation with Inverse Binomial  
971 Sampling. *arXiv preprint arXiv:200103985.* 2020; .
- 972 **Palmer J**, Huk A, Shadlen M. The effect of stimulus strength on the speed and accuracy of a perceptual decision.  
973 *J Vis.* 2005; 5:376–404.
- 974 **Pashler H.** Dual-task interference in simple tasks: data and theory. *Psychol Bull.* 1994; 116(2):220–244.
- 975 **Pashler H**, Luck SJ, Hillyard SA, Mangun GR, O'Brien S, Gazzaniga MS. Sequential operation of disconnected  
976 cerebral hemispheres in split-brain patients. *Neuroreport: An International Journal for the Rapid Communi-  
977 cation of Research in Neuroscience.* 1994; .
- 978 **Paszke A**, Gross S, Massa F, Lerer A, Bradbury J, Chanan G, Killeen T, Lin Z, Gimelshein N, Antiga L, et al. Pytorch:  
979 An imperative style, high-performance deep learning library. In: *Advances in neural information processing  
980 systems*; 2019. p. 8026–8037.
- 981 **Ramachandran V**, Gregory R. Does colour provide an input to human motion perception? *Nature.* 1978;  
982 275(5675):55–56.
- 983 **Ratcliff R.** A theory of memory retrieval. *Psychological Review.* 1978; 85(2):59.
- 984 **Ratcliff R**, Rouder J. Modeling response times for two-choice decisions. *Psychological Science.* 1998; 9(5):347–  
985 356.

- 986 **Remington ED**, Egger SW, Narain D, Wang J, Jazayeri M. A dynamical systems perspective on flexible motor  
987 timing. *Trends in cognitive sciences*. 2018; 22(10):938–952.
- 988 **Resulaj A**, Kiani R, Wolpert D, Shadlen M. Changes of mind in decision-making. *Nature*. 2009; 461(7261):263–  
989 266.
- 990 **Schumacher EH**, Seymour TL, Glass JM, Fencsik DE, Lauber EJ, Kieras DE, Meyer DE. Virtually Perfect Time  
991 Sharing in Dual-Task Performance: Uncorking the Central Cognitive Bottleneck. *Psychological Science*. 2001;  
992 12(2):101108. doi: [10.1111/1467-9280.00318](https://doi.org/10.1111/1467-9280.00318).
- 993 **Shadlen M**, Hanks T, Churchland A, Kiani R, Yang T. The speed and accuracy of a simple perceptual decision: a  
994 mathematical primer. *Bayesian Brain: Probabilistic Approaches to Neural Coding*, ed K Doya et al. 2006; p.  
995 209–237.
- 996 **Shadlen M**, Shohamy D. Decision Making and Sequential Sampling from Memory. *Neuron*. 2016; 90(5):927–  
997 939.
- 998 **Sigman M**, Dehaene S. Parsing a cognitive task: a characterization of the mind’s bottleneck. *PLoS Biol*. 2005;  
999 3(2):e37.
- 1000 **Smith LN**. Cyclical Learning Rates for Training Neural Networks. *arXiv*. 2015; .
- 1001 **Sperling G**. The information available in brief visual presentations. *Psychological monographs: General and*  
1002 *applied*. 1960; 74(11):1.
- 1003 **Stine G**, Zylberberg A, Ditterich J, Shadlen M. Differentiating between integration and non-integration strategies  
1004 in perceptual decision making. *Elife*. 2020; 9.
- 1005 **Tombu M**, Jolicoeur P. Testing the predictions of the central capacity sharing model. *Journal of Experimental*  
1006 *Psychology: Human Perception and Performance*. 2005; 31(4):790.
- 1007 **Tombu M**, Jolicoeur P. Virtually No Evidence for Virtually Perfect Time-Sharing. *Journal of Experimental Psychol-*  
1008 *ogy: Human Perception and Performance*. 2004; 30(5):795. doi: [10.1037/0096-1523.30.5.795](https://doi.org/10.1037/0096-1523.30.5.795).
- 1009 **Tombu M**, Jolicoeur P. All-or-none bottleneck versus capacity sharing accounts of the psychological refractory  
1010 period phenomenon. *Psychological research*. 2002; 66(4):274–286.
- 1011 **Usher M**, Olami Z, McClelland JL. Hick’s law in a stochastic race model with speed–accuracy tradeoff. *Journal*  
1012 *of Mathematical Psychology*. 2002; 46(6):704–715.
- 1013 **Waskom ML**, Kiani R. Decision making through integration of sensory evidence at prolonged timescales. *Cur-*  
1014 *rent Biology*. 2018; 28(23):3850–3856.
- 1015 **Welford AT**. The ‘PSYCHOLOGICAL REFRACTORY PERIOD’ AND THE TIMING OF HIGH-SPEED PERFORMANCE-A  
1016 REVIEW AND A THEORY. *British Journal of Psychology General Section*. 1952; 43(1):2–19. doi: [10.1111/j.2044-](https://doi.org/10.1111/j.2044-8295.1952.tb00322.x)  
1017 [8295.1952.tb00322.x](https://doi.org/10.1111/j.2044-8295.1952.tb00322.x).
- 1018 **Wu Z**, Litwin-Kumar A, Shamash P, Taylor A, Axel R, Shadlen M. Context-Dependent Decision Making in a  
1019 Premotor Circuit. *Neuron*. 2020; 106(2):316–328.e6.
- 1020 **Yang T**, Shadlen M. Probabilistic reasoning by neurons. *Nature*. 2007; 447(7148):1075–1080.
- 1021 **Zylberberg A**, Fernández Slezak D, Roelfsema P, Dehaene S, Sigman M. The brain’s router: a cortical network  
1022 model of serial processing in the primate brain. *PLoS Comput Biol*. 2010; 6(4):e1000765.
- 1023 **Zylberberg A**, Fetsch C, Shadlen M. The influence of evidence volatility on choice, reaction time and confidence  
1024 in a perceptual decision. *Elife*. 2016; 5.
- 1025 **Zylberberg A**, Ouellette B, Sigman M, Roelfsema P. Decision making during the psychological refractory period.  
1026 *Curr Biol*. 2012; 22(19):1795–1799.
- 1027 **Zylberberg A**, Wolpert D, Shadlen M. Counterfactual Reasoning Underlies the Learning of Priors in Decision  
1028 Making. *Neuron*. 2018; 99(5):1083–1097.e6.

## 1029 **Methods**

### 1030 **Participants**

1031 Thirteen participants (5 male and 8 female, age 23–40, median = 26, IQR = 25-32, mean = 28.3, SD  
1032 = 5.74) provided written informed consent and took part in the study. All participants had normal  
1033 or corrected-to-normal vision and were naïve about the hypotheses of the experiment. The study  
1034 was approved by the local ethics committee (Institutional Review Board of Columbia University  
1035 Medical Center).

### 1036 **Apparatus**

1037 Visual stimuli were displayed on high resolution CRT monitors with 75 Hz screen refresh rate. The  
1038 experiments were conducted in two labs. Table 1 lists the display parameters used in the four ex-  
1039 periments. In the eye-tracking experiments, a head- and chin-rest was used, and eye position was  
1040 monitored at 1 kHz using an Eyelink 1000 device (SR Research Ltd., Mississauga, Ontario, Canada).  
1041 In the reaching task participants used robotic handles (vBots, *Howard et al. 2009*) to indicate their  
1042 choices, and movement trajectories were recorded at 1 kHz. The experiments were run using Mat-  
1043 lab and Psychtoolbox (*Brainard, 1997*) and for the online experiments jsPsych (*De Leeuw, 2015*).

### 1044 **Overview of experimental tasks**

1045 Participants sat in a semi-dark booth in front of a CRT monitor. They were required to decide the  
1046 net direction and the dominant color in a patch of dynamic random dots. Individual dots were  
1047 displayed for a single video frame (1/75 s). Task difficulty for motion was conferred by the proba-  
1048 bility that in frame  $n + 3$  (i.e.,  $\Delta t = 40$  ms), it would be displaced in apparent motion vs. randomly  
1049 replaced in the aperture. We prepend the probability by plus or minus to indicate the direction,  
1050 and refer to this signed quantity in units of coherence (coh). For color, task difficulty was conferred  
1051 by the probability that a dot would be colored blue or yellow on each frame. We refer to the signed  
1052 quantity,  $2(p_{\text{blue}} - 0.5)$ , as the color coherence. Both coherences share the range  $\{-1, 1\}$ . Through-  
1053 out, we use positive coherence for rightward and blue dominant stimuli. The coherences were  
1054 stationary during a trial but randomized independently across trials. A calibration procedure was  
1055 used to match the luminance of the blue and yellow for each participant (see below). For the first  
1056 experiment (choice-reaction time, participants S1-S3) the color of the dots in the first three frames  
1057 of a trial was balanced to give no net color information. The procedure was intended to match  
1058 the state of the motion stimulus which is effectively zero-coherence until the fourth video frame.  
1059 Subsequent experience demonstrated that this procedure was unnecessary, and we discontinued  
1060 this practice for the other experiments.

1061 We conducted two types of tasks, a double-decisions (2D) in which both the dominant color and  
1062 motion direction were reported on each trial, or single-decisions (1D) in which only the dominant  
1063 color or net motion direction were reported (as in *Mante et al. 2013*). For 1D experiments the  
1064 “irrelevant” dimension was varied from trial to trial just as in the 2D task. Variations on this basic  
1065 design are described in the following sections. We first describe the choice-reaction time task (eye)  
1066 and then the differences for the other experiments.

1067 For each experiment, the sample size was determined based on prior psychophysics studies  
1068 with within-subject designs (*Palmer et al., 2005; Resulaj et al., 2009; Zylberberg et al., 2012; Kiani*  
1069 *et al., 2014*). Furthermore, trial numbers were chosen such that the number of trials within each  
1070 dimension given the other dimension’s strength were similar to prior studies (e.g., *Kang et al. 2017*).  
1071 We recruited three participants for the first and second experiment (Choice-reaction time task and  
1072 short duration, eye). For the remaining experiments we recruited 2–8 participants. A larger num-  
1073 ber was necessary for the arm experiments because fewer trials per hour are acquired and the  
1074 effort is greater. Unless otherwise stated, participants were randomly allocated to experiments.



### 1075 **Choice-reaction time task (eye)**

1076 Three participants (1 male and 2 female, aged 25–40) performed the task in which they could view  
1077 the random dots until ready with a response (Fig. 1a). Participants were required to fixate a central  
1078 spot for 0.5 s to initiate a trial. In the main task (2D), four choice targets appeared at four corners  
1079 of the display, evenly spaced from each other and the same distance from the fixation spot. The  
1080 top two targets were colored yellow and the bottom two blue, consistent with the color choices  
1081 they indicate. For example, to report rightward motion and yellow color, the participant would  
1082 saccade to the top right target, which was yellow. After a random delay, a patch of dynamic random  
1083 dots appeared which were restricted between invisible circles of diameter 1 and 5° centered on  
1084 the fixation spot. The random dots were extinguished when the participant initiated the choice  
1085 response. Participants were required to respond within 5 seconds of the stimulus onset. Trials in  
1086 which no response was initiated and those aborted by breaking fixation were repeated at a later  
1087 time in the experiment. At the end of each trial, the correct target was marked on the screen, and  
1088 auditory feedback was provided when both dimensions were judged correct.

1089 Participants performed three trial types: color-only, motion-only and color-motion (i.e., double)  
1090 decisions. For color-motion trials four targets were displayed as in the experiments described  
1091 above. For motion-only trials two white targets were shown to the left and right of the stimulus,  
1092 respectively. For the color-only task, one blue and one yellow target were presented above and  
1093 below the center of the screen, respectively. Participants performed the three trial types in separate  
1094 13-min blocks in a random order, in 24–49 blocks over 11–17 days (4775–10973 trials). For  
1095 the 2D task, 5 strengths (or 9 signed coherences including 0) were used on both dimensions (see  
1096 Table 2). The set of non-zero motion strengths was doubled for one participant (S1) because they  
1097 failed to achieve >90% correct at  $\text{coh}=0.256$  during training. Likewise, the range of color strengths  
1098 was doubled for two participants (S1 and S3). For the 1D task, two of the strengths were not used  
1099 for the irrelevant dimension.

1100 *Minimum-motion procedure.* Prior to the experiment, we calibrated the two colors (yellow and  
1101 blue) to be equiluminant using the minimum-motion procedure (Cavanagh *et al.*, 1987). Two vertical  
1102 sinusoidal gratings with a spatial frequency of 1.25 cyc/deg were shown with a temporal frequency  
1103 of 6.25 Hz. The first grating had alternating yellow and blue, and the second grating had  
1104 alternating light and dark green, and they were arranged in a way that if yellow were brighter than  
1105 blue, the gratings appear to move in one direction (e.g., left), and vice versa. The participant  
1106 adjusted the luminance of yellow until they did not see net motion, starting from a random luminance  
1107 value. After 24 trials, the mean luminance of the yellow was computed and used throughout the  
1108 experiment for the participant.

1109 *Training sessions.* Participants completed 11–13 training blocks (13 minutes, 200 trials) over 4–7  
1110 days, beginning with either an easy motion or color 1D task (counterbalanced across participants)  
1111 and with viewing durations controlled by the experimenter. The incorporation of weaker stimulus  
1112 strengths and the range of stimulus durations were adjusted progressively. Transitions to the  
1113 next level were made if the participant met fixation requirements and achieved >90% accuracy on  
1114 the strongest coherence. The aim was to identify four levels of motion strength  $\geq 0.032$  and four  
1115 levels of color strength  $\geq 0.031$  in octaves steps such that the strongest level (8 times the lowest  
1116 logit) supported >90% accuracy. We then changed from variable duration to the reaction time  
1117 version of the 1D task, again ensuring that the range of difficulties led to at least 90% accuracy  
1118 for the easiest condition. We then repeated these steps for the other stimulus dimension before  
1119 introducing the 2D choice-RT task. They received a session of practice to gain familiarity with the  
1120 4-choice design. For participants S1 and S3, we made a final adjustment of the difficulty levels. The  
1121 stimulus strengths were then fixed for all test sessions (Table 2).

### 1122 **Brief duration task (eye)**

1123 The same participants from the choice-reaction time task then performed a task that was identical  
1124 except that the dynamic random dots turned off after 120 ms from the onset. Participants were

1125 free to respond after the offset of the dynamic random dots. The “RT” in this task was measured  
1126 as the time between the onset of the stimulus and the response (the time the gaze left the center  
1127 of the screen).

1128 Participants completed a total of 35–43 test blocks that each lasted 13 minutes (7309–7745  
1129 trials over 12–19 days). The stimulus strengths used are listed in Table 2.

### 1130 **Variable duration task (eye)**

1131 Two participants (2 female, aged 26 and 32; both right-handed) participated and completed a total  
1132 of 12–26 test sessions that each lasted between 1–2h.

1133 After a training phase (see below) the task alternated between blocks of 72–144 trials where  
1134 participants either performed the 2D variable duration task, a 1D variable duration task or 2D  
1135 choice-reaction time task. The majority of blocks were 2D variable duration (total of 11,808 tri-  
1136 als). Ten fixed stimulus durations ranging from 120–1200 ms (in steps of 120 ms) were presented  
1137 in pseudo-random order. Warning messages were displayed if participants initiated an eye move-  
1138 ment before the end of the stimulus (“too early!”) or if a movement was not initiated within 5 sec of  
1139 stimulus offset (“too slow!”). In both cases, the trial was aborted and repeated at a later, randomly  
1140 determined, trial within the same block.

1141 Only three levels of difficulty were used for each dimension: one easy and two difficult coher-  
1142 ence levels. The easy coherence level was 0.512 for motion and 0.758 for color. The two diffi-  
1143 cult coherence levels were adjusted individually in order to match color and motion performance.  
1144 Specifically, low coherences for each dimension were chosen to yield 65% and 80% accuracy on  
1145 each dimension, respectively, based on participants’ performance in the final two training sessions  
1146 (double-decision RT). All low-coherence levels were  $< 0.1$  for both participants. All  $3 \times 3$  combina-  
1147 tions of motion  $\times$  color were presented. However, since the main model predictions are based on  
1148 a comparison of trials with hard-hard vs. hard-easy combinations, easy-easy combinations were  
1149 only presented in 2.4% of trials. All other coherence combinations were presented with equal  
1150 frequency and counter-balanced within each stimulus duration. Participants also completed 2,160  
1151 trials each of motion-only and color-only trials and 1,296 trials of the 2D choice-RT task which were  
1152 included to ensure that they maintained appropriate speed-accuracy trade-offs throughout the  
1153 experiment.

1154 *Training sessions.* Participants first completed 6–9 training sessions. In the first 2 sessions,  
1155 they were trained on a variable duration task where stimulus durations were drawn randomly  
1156 from a truncated exponential distribution ranging between 500–2000 ms (session 1) or 100–1600  
1157 ms (session 2). Participants first completed 1D-motion and 1D-color tasks in separate blocks,  
1158 followed by the 2D task. In the remaining training sessions, participants mainly performed a  
1159 2D RT task until they reached stable performance (at least 60% accuracy on the 2nd coherence  
1160 level for both decision dimensions, with little to no changes in choice performance or RTs over  
1161 blocks). Occasionally, additional 1D blocks were introduced in order to obtain similar performance  
1162 levels for motion and color judgments. Throughout training, all 6 coherence levels for motion  
1163  $\{0, 0.032, 0.064, 0.128, 0.256, 0.512\}$  and color  $\{0, 0.064, 0.128, 0.250, 0.472, 0.758\}$ , and all their possible  
1164 combinations, were presented.

1165 *Isoluminance calibration.* At the start of the experiment, participants completed a flicker fu-  
1166 sion procedure to match luminance of yellow and blue. A square ( $4.9 \times 4.9^\circ$ ) was presented in the  
1167 center of the screen. The color of the square flickered at 37.5 Hz between cyan and yellow. For  
1168 efficiency we only explored values  $[R \ G \ B] = [0 \ x \ x]$  and  $[R \ G \ B] = [y \ y \ 0]$ , for cyan and yellow,  
1169 respectively, where  $x, y \in \{\mathbb{N} : 0, \dots, 255\}$ . Participants pressed the left or right arrow key to mini-  
1170 mize the perceived flicker. One key changed  $x$  and  $y$  by  $+1$  and  $-1$ , respectively, and the other key  
1171 had opposite effect. Participants pressed the space bar to signal the subjective point of minimal  
1172 flicker. This procedure was repeated 10 times, each time starting with new initial values  $[x \ y]$ , cho-  
1173 sen pseudo-randomly, such that either yellow or blue was dark while the other color was bright  
1174 (counter-balanced across trials). The precise initial values were chosen to be equidistant from 225

1175 and were between 195-200 for the darker color and 250-255 for the brighter color (e.g., blue would  
1176 start at [0 197 197] and yellow would start at [253 253 0]). This ensured sufficient contrast to induce  
1177 a flicker at the start of each trial. The averages across the 10 trials were adopted as the isolumi-  
1178 nant setting for the participant. After the procedure, participants were presented with a single trial  
1179 with the obtained color values and were asked to report if they perceived a flicker. If they did, the  
1180 procedure was repeated. The same calibration procedure was also used for the next experiment.

### 1181 **Choice-reaction time task (arm)**

1182 Twelve right-handed participants were initially recruited for the experiment. After training, 8 par-  
1183 ticipants were selected for the actual experimental sessions based on their overall performance.  
1184 Participants completed two test sessions with a unimanual version of the task and two test sessions  
1185 with a bimanual version (order counterbalanced across participants). In each experimental session,  
1186 all 6 color  $\times$  6 motion strengths combinations were presented – that is {0, 0.032, 0.064, 0.128, 0.256, 0.512}  
1187  $\times$  {0, 0.064, 0.128, 0.25, 0.472, 0.758} – pseudo-randomly in 12 blocks of 96 trials each (total of 1152 tri-  
1188 als). The order of unimanual and bimanual sessions was counterbalanced across participants.

1189 Unlike the eye experiments, no choice targets were present on the screen. Instead, there were  
1190 arrow icons that indicated the mapping of color and motion to forward/backward (appropriately  
1191 colored) and left/right directions of the hand (Fig. 5A). The mapping of blue/yellow to bottom/top  
1192 target locations was counterbalanced across participants. The movements themselves were re-  
1193 stricted to virtual channels in the plane. In the unimanual task, participants moved a single robotic  
1194 handle with either their left or right hand (counterbalanced across each half of a session) in one of  
1195 the 4 diagonal target directions (2 color  $\times$  2 motion; as in the other experiments). In the bimanual  
1196 task, participants used two separate robotic handles to move their left and right hand in a left/right  
1197 (motion judgments) and forward/backward (color judgments) direction, respectively (hand assign-  
1198 ment counterbalanced across participants). Feedback about the hand position(s) was provided by  
1199 two black bars on top of the arrow icons (for clarity shown as grey in Fig. 5A). Participants were in-  
1200 structed to move each bar in the chosen direction until their hand(s) reached a virtual ‘wall’ at the  
1201 end of the channel, at which point their decisions were registered. Movement distances between  
1202 starting positions and target locations were identical in the uni- and bimanual task (5 cm). On 2D  
1203 trials the random dots were extinguished when both decisions were indicated, that is when the  
1204 hand left the home position in the unimanual task and when both hands had left the home posi-  
1205 tion in the bimanual task. Warning messages were presented if participants initiated a response  
1206 before stimulus onset (“too early”) or when RTs exceeded 5 sec (“too slow!”). In both cases, the trial  
1207 was aborted and was repeated at a later, randomly determined, trial within the same block.

1208 Once participants indicated their decision, green/red frames were presented around the re-  
1209 sponse arrows to indicate correct/incorrect choices separately for each decision dimension. If both  
1210 decisions were correct, additional auditory feedback was provided (700 Hz tone) indicating that par-  
1211 ticipants had won one point. Participants were instructed to maximize points by responding as fast  
1212 and accurately as possible. At the end of each trial, they received feedback regarding their current  
1213 rate of rewards (points/min) as well as a graph of their scores in each 2 minute period over the  
1214 last 10 minutes. To further motivate participants to adopt appropriate speed-accuracy trade-offs,  
1215 feedback duration was longer for errors than correct responses, hence delaying the onset of the  
1216 next trial (correct: 1250 ms; error on one dimension: 2000 ms; error on both dimensions: 3000 ms).  
1217 At the end of the trial the robotic interface actively moved the hand(s) back to the home position(s).

1218 *Training* All participants completed 3-4 initial training sessions, using the version of the task that  
1219 they were assigned to first (uni- or bimanual, counterbalanced; see above). In the first two training  
1220 sessions, participants performed a variable duration task with stimulus durations varying between  
1221 500-2000 ms. The third training session introduced the choice-RT design. To train participants  
1222 to maximally separate their two hands in the bimanual version, the RT training task alternated  
1223 between easy-motion (motion coherence = 0.512) and easy-color (color coherence = 0.758) blocks,  
1224 and participants were encouraged to respond as quickly as possible to the easy dimension while

1225 taking more time to make a correct choice on the harder dimension. For participants who were  
1226 first trained on the unimanual version, stimulus coherences were also presented in blocks of easy-  
1227 motion vs. easy-color to ensure consistency in training across all participants. Participants were  
1228 invited for the experimental sessions only if their overall rate of warning messages was less than  
1229 5% and if their average accuracy was at least 95% on the easy dimension and at least 65% on the  
1230 3rd highest coherence level of the harder dimension (motion: 0.064; color: 0.128).

1231 After initial training, participants completed 2 experimental sessions of the task they had been  
1232 trained on (either uni- or bimanual RT task). They then completed another practice session, in  
1233 which they were trained on the other version of the task (either bi- or unimanual RT task), before  
1234 completing 2 final experimental sessions with this version of the task. Experimental sessions only  
1235 differed in motor implementation of decisions (uni- vs. bimanual), but were otherwise identical,  
1236 and S-R mappings were kept constant within participants.

### 1237 **Binary choice-reaction time task**

1238 The experiment was conducted remotely during the SARS-CoV-2 pandemic (summer 2020). Two  
1239 participants who had also completed the uni- and bimanual tasks were recruited for this experi-  
1240 ment. Participants completed the task online using a Google Chrome browser on Windows 10 and  
1241 macOS Catalina (version 10.15.4), respectively. Both participants completed eight separate one  
1242 hour sessions within a two week time period. The task was programmed in JavaScript and jsPsych  
1243 (*De Leeuw, 2015*).

1244 During the task, two random dot motion patches with rectangular apertures (each  $3 \times 5^\circ$ ) were  
1245 presented to the left and right of a red fixation and separated by a central gray bar ( $2 \times 5^\circ$ ) cross  
1246 Fig. 7A. Motion direction (up/down) and coherence ( $\{0.128, 0.256, 0.512\}$ , referred to as low, medium  
1247 and high) of the two stimuli were independent of each other. The six unique coherence combina-  
1248 tions were presented with equal frequency and in randomized order. The stimuli directions and  
1249 allocation to the left vs. right side of the screen were counterbalanced. Participants had to judge  
1250 whether the dominant motion directions of the two stimuli were the same or different and indicate  
1251 their choice by pressing the F or J key with their left/right index finger, respectively, when ready.  
1252 The response mapping was counterbalanced across the two participants and was shown at the  
1253 bottom of the screen throughout the task. Visual feedback was provided at the end of each trial.  
1254 For correct responses, participants won 1 point. After errors and miss trials (too early/late), partic-  
1255 ipants lost 1 point. Miss trials were repeated at a random trial during the same block. Participants  
1256 were instructed to try and win as many points as possible and they received an extra bonus of one  
1257 cent for every point they won. Their point score was shown in the corner of the screen throughout  
1258 the task and additional feedback about percent accuracy was provided at the end of every block.

1259 Participants first completed 3 training sessions after which they completed 4 sessions of the  
1260 same-different task (3072 trials in total). Finally, participants completed a single session (768 trials)  
1261 of a 1D task in the random dot motion was restricted to the left or right patch (counterbalanced  
1262 across trials) and participants had to judge the motion direction (up/down) by pressing the M or K  
1263 key with their right index/middle finger, respectively.

1264 At the end of each session, participants completed a separate block of 32 trials with 100% co-  
1265 herence stimuli only (sessions 1-7: same-different task; sessions 8: 1D task). Participants were  
1266 instructed that decisions in this block would be very easy and that they should respond as fast as  
1267 they could while still being accurate. The reaction times obtained from these blocks (not shown)  
1268 serve as a check on our estimate of the non-decision time (*Stine et al., 2020*). Participants were  
1269 instructed to maintain fixation throughout the task. At the end of each session, they provided self-  
1270 report judgments indicating to what extent they kept fixation during the task on a scale from 1  
1271 ("not at all") to 4 ("always"). The mean and interquartile range of the reports were 3.75 and 3.5–4  
1272 (combined for the two participants). Prior to the experiment, participants completed a virtual chin-  
1273 rest procedure in order to estimate viewing distance and calibrate the display in terms of viewing  
1274 angle (*Li et al., 2020*). This involves first adjusting objects of known size displayed on the screen to

1275 match their physical size and then measuring the distance from fixation to the blind spot on the  
1276 screen (corresponding to around 13.5°).

### 1277 **Serial and parallel drift diffusion models**

1278 Both the serial and parallel models assume that decisions are based on the accumulation of evi-  
1279 dence over time. The decision processes for color and motion are described by two independent  
1280 Wiener processes with drift. The decision variable for one of the dimensions (here motion), evolves  
1281 according to the sum of a deterministic and a stochastic component:

$$\Delta V_m = \mu_m \Delta t + \mathcal{N}(0, \sqrt{\Delta t}) \quad (1)$$

1282 The deterministic term depends on the drift  $\mu_m$ ,

$$\mu_m = \kappa_m (s_m + s_m^0), \quad (2)$$

1283 where  $s_m$  is the stimulus motion strength (signed coherence). By convention,  $s_m$  is positive  
1284 (negative) when the motion is to the right (left).  $\kappa_m$  is a parameter that converts coherence to a  
1285 signal-to-noise ratio, which we fit to the data.  $s_m^0$  is a bias that allows us to explain, for example,  
1286 why left and right responses may not be equiprobable even when there is no net motion in either  
1287 direction. We model the bias term as an offset in the coherence rather than the starting point  
1288 of the accumulation. This approximates the optimal way of incorporating a bias in drift-diffusion  
1289 models when there is uncertainty about the reliability of evidence (e.g., the coherence levels vary  
1290 across trials) (*Hanks et al., 2011; Zylberberg et al., 2018*).

1291 The second term of Eq. 1 describes the stochasticity that affects the evolution of the decision  
1292 variable. It captures the variability introduced by the stimulus and the brain. This variability is  
1293 modeled as samples from a normal distribution with zero mean. By convention, the standard  
1294 deviation is  $\sqrt{\Delta t}$ , which results in the variance of the decision variable equal to 1 after accumulating  
1295 evidence for 1 second. This choice does not lead to any loss of generality since for any other value  
1296 it would be possible to define a new model that has the same behavior in which the variance is 1  
1297 and the other parameters are a scaled version of the original ones (*Palmer et al., 2005*).

1298 The accumulation process stops and a decision is made when the accumulated evidence reaches  
1299 one of two bounds. The choice is 'rightward' if the decision terminates at the upper bound, and  
1300 'leftward' if it terminates at the lower bound. The decision time is the time  $T_m$  that it takes the  
1301 decision variable to cross the bound. The upper and lower bounds are assumed symmetric with  
1302 respect to zero. To explain why errors are (often) slower than correct responses, the bounds are  
1303 allowed to collapse over time. We parameterize the bound as a logistic function with slope  $a_m$ . The  
1304 bound reaches a value of  $u_m/2$  at  $t = d_m$  and approaches 0 as  $t \rightarrow \infty$ :

$$B_m(t) = \frac{u_m}{1 + e^{a_m(t-d_m)}} \quad (3)$$

1305 with lower bound simply  $-B_m(t)$ .

1306 Although the previous explanation focused on the motion decision, the same equations de-  
1307 scribe the decision process for color. We use subscript  $c$  instead of  $m$  to refer to the color decision,  
1308 and adopt the convention that positive (negative) evidence supports the blue (yellow) choice.

1309 Given a set of parameters ( $\Phi_x = [\kappa_x, s_x^0, B_x^0, a_x, d_x]$ ), where  $x \in \{c, m\}$ , we can estimate the proba-  
1310 bility density function for the decisions time  $T_x$ , and the two possible choices  $R$  (right/left for motion  
1311 and blue/yellow for color). This density function, denoted  $p_x^s(T, R)$ , depends on the signed stimu-  
1312 lus coherence,  $s$ . We obtain it by numerically solving the Fokker-Planck equation associated with  
1313 the Wiener process with drift (*Kiani and Shadlen, 2009*), using the numerical method of Chang &  
1314 Cooper (1970).

1315 So far, the model description applies to making single decisions (1D) for motion and color. The  
1316 serial and parallel models are used to explain how combined color-motion decisions (2D) are made.



1317 In the serial model the accumulation of evidence at any time can only be for color or motion and  
1318 therefore the total decision time  $T$  is the sum of the decision times for motion ( $T_m$ ) and color ( $T_c$ ),  
1319 and the distribution of decision time is given by:

$$p_{\text{serial}}^{s^m \cdot s^c}(T | R_c, R_m) = p^{s^m}(T_m | R_m) * p^{s^c}(T_c | R_c), \quad (4)$$

1320 where  $R_c$  and  $R_m$  are the responses (i.e., choices) for color and motion, respectively, and  $*$   
1321 denotes convolution.

1322 In contrast in the parallel model both the motion and color are processed simultaneously and,  
1323 therefore, the decision time is the maximum of either decision time:  $\max(T_c, T_m)$ . We can numeri-  
1324 cally derive the distribution of decision times from the single-modality distributions by noting that  
1325 the decision time is equal to  $t$  if (i) motion ended at time  $t$  and color ended before time  $t$ , (ii) color  
1326 ended at time  $t$  and motion ended before time  $t$ . Thus,

$$p_{\text{parallel}}^{s^m \cdot s^c}(T | R_c, R_m) = p^{s^m}(T | R_m) \int_0^T p^{s^c}(\tau | R_c) d\tau + p^{s^c}(T | R_c) \int_0^T p^{s^m}(\tau | R_m) d\tau \quad (5)$$

1327 Besides the decision-time, there are sensory, motor and processing delays that contribute to  
1328 the total response time. We assume that the combined non-decision latencies,  $T_{nd}$  are normally  
1329 distributed with a mean of  $\mu_{nd}$  and a standard deviation of  $\sigma_{nd}$ . The observed RT distribution  
1330 for each stimulus condition and choice is then obtained by convolving the distributions of the de-  
1331 cision times and the non-decision times, which follows from the assumption that decision and  
1332 non-decision times are additive and independent.

1333 To avoid over-fitting, our strategy for comparing the serial and parallel models was to fit all  
1334 parameters using the subset of trials in which one of the two dimensions had maximum strength  
1335 (Fig. 1b). We used the Bayesian Adaptive Direct Search method (**Acerbi and Ma, 2017**) to search over  
1336 the space of parameters. The best-fitting parameters are shown in Table 4, for each participant  
1337 and model type.

1338 From the marginal distributions, we predict the choices and response times for all combina-  
1339 tions of motion and color coherence, and compare the models by the probability that each one  
1340 assigns to the data that was not used for fitting. Because the two models have the same num-  
1341 ber of parameters ( $N = 12$ : 5 each for  $\Phi_m$  and  $\Phi_c$ , plus 2 for non-decision time), we can directly  
1342 compare the raw likelihoods (**Figure 2-Figure Supplement 1**).

1343 We conducted a model recovery exercise to verify that our fitting procedure would recover the  
1344 correct model if the data were generated by either the serial or the parallel model. For each partic-  
1345 ipant and model type (serial/parallel), we generated a synthetic data set with the same number of  
1346 trials per condition (combination of color and motion coherence) as completed by the participant.  
1347 The parameters used to generate the synthetic data set were those that best fit the participants'  
1348 data (that is, those shown in Table 4). Then we repeated the model comparison (just as we did for  
1349 the participants' data) and assessed whether it favored the model that was used to generate the  
1350 simulated data. **Figure 2-Figure Supplement 1** shows that our model comparison procedure can  
1351 reliably identify the correct model for 37 out of 38 comparisons.

1352 For the binary choice-reaction time task we fit a serial drift diffusion model jointly to the 1D  
1353 and 2D choices and mean RTs for each participant. The 1D model is simple diffusion to stationary,  
1354 symmetric bounds, which determine the proportion of up and down choices as a function of mo-  
1355 tion coherence, as in Eqs. 1 and 2. For the 2D trials we assumed that participants applied the same  
1356 decision process to each stimulus to determine an up-down choice and that the same-difference  
1357 response was made by comparing the two decisions. We assumed that sensitivity was the same  
1358 for the 1D and 2D choices but allowed separate bounds and non-decision times. The application  
1359 of stationary (i.e., non-collapsing) bounds fails to account for the distribution of RTs and it underes-  
1360 timates the mean RT on errors (**Ratcliff and Rouder, 1998; Drugowitsch et al., 2012**). We therefore  
1361 fit the mean RTs for the correct choices. For the same-different task, we are assuming negligible  
1362 contribution of double errors (i.e., incorrect direction decisions for both the left and right patch)

1363 to the mean RT. The fit maximized the likelihood of the choice assuming binomial error (from the  
1364 model) and Gaussian error (from the data).

### 1365 **Comparison of double-decision reaction times under serial and parallel rules**

1366 We pursued a second approach to compare serial and parallel integration strategies, focusing  
1367 specifically on the decision times. Unlike the fits to choice-RT, this method uses each participant's  
1368 choices as ground truth. It considers only the distribution of RTs and attempts to account for them  
1369 under serial and parallel logic. Instead of diffusion models, we estimated the marginal distribu-  
1370 tions for each 1D decision time with gamma distributions. Specifically, for each motion strength  
1371 and choice ( $s_m$  &  $R_m$ ) and each color strength and choice ( $s_c$  &  $R_c$ ) we modeled the 1D decision time  
1372 distributions as a gamma distribution (two parameters governing mean and standard deviation).  
1373 These 1D distributions allowed us to predict the decision time on 2D trials under a serial (additive)  
1374 and parallel (max) rule. The non-decision times were also modeled as four gamma distributions,  
1375 one for each combination of the four choices ( $R_m$  &  $R_c$ ). The reaction time distribution was ob-  
1376 tained by convolution of the decision time and non-decision time distribution. Each participant's  
1377 data was fit under the serial and parallel model by maximum likelihood (using Matlab fmincon). For  
1378 robustness, only combinations of strengths and choices with more than 10 trials were included in  
1379 the fit. The analysis is therefore heavily weighted toward correct trials. Comparison of models was  
1380 based on log likelihoods of the data given the fitted parameters for each participant.

1381 We validated this method on synthetic data from a parallel and serial simulation and showed  
1382 that model recovery was accurate (**Figure 2–Figure Supplement 2**).

1383 We also deployed the fit-predict strategy used in Fig. 2, where we estimated the gamma distri-  
1384 butions for the 1D decision times and using only the conditions in which one or the other stimulus  
1385 dimension was at its maximum strength ( $|s|$ ) (**Figure 2–Figure Supplement 5**).

1386 For the binary response task (same/different judgments), a simplified version of this model was  
1387 used (**Figure 7–Figure Supplement 1**). Only absolute coherence levels of each motion stimulus were  
1388 considered to fit the marginal gamma distributions. Additionally, only RTs from correct trials were  
1389 included in this model. Finally, in order to estimate the distribution of  $T_{nd}$ , only a single gamma  
1390 distribution was fitted.

### 1391 **Variable duration model**

1392 We assume that when the duration of the color-motion stimulus is controlled by the experimenter,  
1393 the choices are still governed by bounded integration. Thus decisions can terminate (e.g. at time  
1394  $T_m$  for motion) before the stimulus duration,  $T_{dur}$  (**Kiani et al., 2008**). For example in a 1D decision  
1395 about motion stimulus with strength  $s_m$ , the choice is determined by (1) the distribution of termi-  
1396 nation times,  $f_+^{s_m}(T_m)$  and  $f_-^{s_m}(T_m)$ , at the positive and negative bounds, respectively, up to  $T_{dur}$   
1397 and (2) the probability that the sign of the unabsorbed  $V_m(t = T_{dur})$  is of the corresponding sign.  
1398 For example the probability of rightward decision for a stimulus duration  $T_{dur}$  is

$$1399 p(R_m = 1) = p\{V_m(T_{dur}) > 0\} + \int_0^{T_{dur}} f_+^{s_m}(T_m = t) dt \quad (6)$$

1400 Note that  $f_+^{s_m}$  is not a proper density; the total probability at  $t = T_{dur}$  comprises absorption times  
1401 at both bounds and the probability of unterminated  $V_m(T_{dur})$ .

1402 To fit the data in Fig. 4 we employ two drift diffusion models, for color and motion, which only  
1403 interact in the way they access the stream of sensory evidence. This interaction is governed by  
1404 two parameters, one that determines the amount of time ( $T_{buf}$ ) for which processing occurs in  
1405 parallel before proceeding to a serial processing stage, and the second ( $p_{motion-1st}$ ) the probability  
1406 that motion is prioritized over color during the serial stage. If motion is prioritized on a particular  
1407 trial, for example, the motion process accumulates evidence in the serial phase until a decision  
bound is crossed at which point color evidence continues to accumulate. Therefore, if  $V_m$  does

1408 not reach a decision bound before the sensory stream terminates, no further color evidence is  
1409 accumulated after the parallel phase.

1410 To model the double-decisions, we used the two 1D processes to specify the duration of the  
1411 stimulus that was used for motion processing,  $T_m$ , and color processing,  $T_c$ . On a trial in which  
1412 motion is prioritized, the time component that contributed to the motion accumulation ( $T_m$ ) is  
1413 either the time,  $T_m$ , that  $V_m$  reaches a termination bound or  $T_{dur}$  if it does not reach a bound.  
1414 These two possibilities bear on the maximum time available for color processing ( $t_{max}^c$ ):

$$t_{max}^c = \begin{cases} T_{dur} & \text{if } T_{dur} \leq T_{buf} \text{ OR } T_m \leq T_{buf} \\ T_{buf} + (T_{dur} - T_m) & T_m > T_{buf} \\ T_{buf} & \text{if } T_{dur} > T_{buf} \text{ and no } T_m \end{cases} \quad (7)$$

1415 The three conditions in Eq. 7 can be understood intuitively. (1) If the stimulus is shorter than  
1416 the parallel phase or if motion has terminated in this phase, then the maximum time available for  
1417 color processing is the full duration of the stimulus. (2) If motion terminates in the serial phase,  
1418 then the maximum time available for color is the duration of the parallel phase and what time  
1419 remains of the serial phase after motion has terminated. (3) If motion does not terminate, then  
1420 color is only processed during the parallel phase. With probability  $1 - p_{motion-1st}$ , color is prioritized,  
1421 and the complementary logic holds.

1422 Note that if  $T_{buf} = 0$ , the model is purely serial with one change from motion to color with  
1423 probability  $p_{motion-1st}$  or from color to motion with probability  $1 - p_{motion-1st}$ . Although realized  
1424 as a single switch, the model is qualitatively indistinguishable from other alternation schedules  
1425 that preserve the same competition for processing time. For  $T_{dur} \leq T_{buf}$ , the model is effectively  
1426 parallel. We fit a parallel model to the data (**Figure 4-Figure Supplement 2**) by fixing  $T_{buf}$  to the  
1427 longest duration tested (1.2 s).

1428 Each of the 1D diffusions were modeled similar to those used for the RT task, except for the  
1429 following minor modifications. (1) We did not include a parameter for nondecision times, because  
1430 we only modeled choices. (2) We parameterized the bound as an exponential function that is  
1431 clipped to have a maximum at  $u_m$  and start decreasing from  $t = g_m$  with a half-life of  $d_m$ :

$$B_m(t) = u_m \min(2^{-(t-g_m)/d_m}, 1) \quad (8)$$

1432 with lower bound simply  $-B_m(t)$ . The same parameterization applies to the color bound (terms  
1433 with subscript c in Table 5).

1434 The model was implemented in PyTorch (**Paszke et al., 2019**) with an Adam optimizer (**Kingma  
1435 and Ba, 2014**) and a modified version of the cyclical learning rate schedule that simply switched  
1436 back and forth between 0.05 and 0.025 every 25 epochs (**Smith, 2015**). We verified that this proce-  
1437 dure reliably recovers the  $T_{buf}$  (see **Figure 4-Figure Supplement 1**). Briefly, in Adam, the learning  
1438 rate gives an approximate upper bound to the change each parameter takes per epoch, and the  
1439 step size is also adapted for individual parameters based on the running estimates of the first and  
1440 second moments of the gradient. That is, a high learning rate updates parameters fast and a low  
1441 learning rate allows better convergence at the expense of speed. We fit the model separately for  
1442 each  $T_{buf}$  in steps of 40 ms from 0 to 240 ms and then in steps of 120 ms up to 1200 ms, the longest  
1443 duration of the stimulus we used. The reported estimate of  $T_{buf}$  is the sample value with maximum  
1444 log likelihood. The intervals reported are guided by the observation that choice predictions change  
1445 little with the buffer duration when the duration is long.

1446 To evaluate the validity of the estimates of buffer capacity ( $T_{buf}$ ) shown in Fig. 4, we performed  
1447 two types of analyses for each participant (**Figure 4-Figure Supplement 1**). The first approximates  
1448 the specificity, the second the sensitivity of the estimates. (1) We used the parameters of the best  
1449 fitting diffusion models to the data in Fig. 4 (solid curves; see Table 5) to simulate synthetic data  
1450 using buffer duration of  $T_{buf} = 80$  ms. We fit the synthetic data with models with the buffer capacity  
1451 fixed to other values (from 0 to 240 ms in steps of 40 ms, and from 240 to 1200 ms in steps of

1452 120 ms). We then compared log likelihood of those fits with that of the 80-ms buffer model, and  
1453 repeated the simulation 12 times. (2) We used the parameters of the best fitting diffusion models to  
1454 the data in Fig. 4 to simulate synthetic data using the buffer durations,  $T_{\text{buf}} \neq 80$  ms, and compared  
1455 two fits: with  $T_{\text{buf}} = 80$  ms or the simulated value.

### 1456 Multi-switch model (arm)

1457 In the serial phase of the 2D task, the motion and color processes alternate. Experiments that pro-  
1458 vide only one response time to report both decisions allow us to estimate the overall prioritization  
1459 of one stream over the other but not the frequency of alternation. In contrast, the bimanual task  
1460 provides two response times on each trial. This allows us to estimate the frequency of alternation  
1461 between stimulus dimensions by fitting a model with multiple switches to the response times of  
1462 the first decision in the bimanual task.

1463 The fitting was carried out in two steps. First, we fit the serial model described in Eq. 4 to  
1464 the second response in the bimanual task. The parameters that best fit the data are shown in  
1465 Table 4. Second, with the serial model parameters fixed, we used three additional parameters  
1466 to account for the response times to the decision that was reported first. The three parameters  
1467 are:  $\tau_{\Delta}$ , controlling the average time between alternations of color and motion;  $p_{\text{motion-1st}}$ , the  
1468 probability of starting with motion; and  $T_{\text{nd}}^{\text{1st}}$ , the expectation of the non-decision time for the first  
1469 response.

1470 The alternations are modeled as a renewal. The intervals are independent and identically dis-  
1471 tributed (*iid*) as

$$f_{\text{int}}(t) = \max[a, b], \quad (9)$$

1472 where  $a$  and  $b$  are draws from an exponential distribution with mean  $\tau_{\Delta}$ . The expectation of the  
1473 interval is

$$\mathbb{E}[f_{\text{int}}(t)] = 1.5\tau_{\Delta} \quad (10)$$

1474 We chose this parameterization so that the distribution of inter-switch intervals has a single peak  
1475 and the max operation reduced the probability of very short intervals.

1476 Because there is no closed-form solution to the multi-switch model, we used simulations to fit  
1477 the model parameters to each participants' data. For fitting, we simulate the model 1,000 times  
1478 for each unique combination of color and motion strengths. From the simulations, we average  
1479 the response times for the first decisions split by whether motion or color was reported first, and  
1480 binned them by both motion strength and color strength. This gives the four groupings in Fig. 6.  
1481 The parameters were fit to minimize the sum of squared-errors summed over these four groups;  
1482 in other words, we minimize the sum of the squared errors for the data points shown in Fig. 6.  
1483 We used this approach rather than maximum likelihood because of the difficulties of reliably esti-  
1484 mating the likelihood of the parameters from model simulations for continuous quantities (here,  
1485 response times) (*van Opheusden et al., 2020*).

### 1486 Data Analysis

1487 We used logistic regression to evaluate the influence of task type (single,double) on performance  
1488 in the short-stimulus duration task (Fig. 3). Separate regression models were fit for the color and  
1489 motion decisions. The logistic regression model is:

$$\text{logit}[p_+] = \beta_0 + \beta_1 s + \beta_2 I_{\text{double}} + \beta_3 s I_{\text{double}} + \sum_i^{N_{\text{subj}}-1} \beta_{3+i} I_{\text{subj}} \quad (11)$$

1490 where  $p_+$  is the probability of a positive ('rightward' for the motion task, 'blue' for the color task)  
1491 response,  $s$  is (signed) stimulus strength,  $I_{\text{double}}$  is an indicator variable for task type (single or  
1492 double),  $\beta_3$  is an interaction term which indicates how the influence of strength on choice changes  
1493 in the double task relative to the single task, and  $I_{\text{subj}}$  is an indicator variable that takes a value of

1494 1 if the trial was completed by subject  $subj$  and 0 otherwise. The final term with the summation  
1495 allows for the possibility that different participants had different overall choice biases.

1496 We also used logistic regression to assess whether the strength of one stimulus dimension  
1497 affected the accuracy of the other decision. Separate regression models were fit for the color and  
1498 motion decisions. The logistic regression model to assess whether color strength affects motion  
1499 choice is

$$\text{logit}[p_+] = \beta_0 + \beta_1 s_m + \beta_2 |s_c| + \beta_3 s_m |s_c| \quad (12)$$

1500 where the  $\beta_3$  term accommodates the possibility that the color coherence could affect the slope  
1501 of the logistic function of motion coherence. We used an analogous equation to ask whether mo-  
1502 tion strength affected color sensitivity. For both logistic regression models (Eq. 11 Eq. 12, to test  
1503 whether the interaction ( $\beta_3$ ) has explanatory power in the model we compared the Bayesian Infor-  
1504 mation Criterion (BIC) for nested regression models with and without the  $\beta_3$  term. For Eq. 12 data  
1505 were fit for each participant and the BICs were added.

1506 For the model-free analysis of the time course of the influence of motion and color informa-  
1507 tion on choice Fig. 3, we obtained choice-conditioned averages of the color and motion energies  
1508 extracted from the random-dot stimuli. Because the stimulus is stochastic, the motion and color  
1509 energies vary from one trial to another, and even within a trial. We quantified the motion fluctua-  
1510 tions by convolving the sequence of random dots presented in each trial with a filter selective to  
1511 rightward and leftward motion (see details in *Adelson and Bergen (1985)*; *Kiani et al. (2008)*). The  
1512 results of the convolution are combined over space to obtain the motion energy for each direction  
1513 and as a function of time, and the net motion energy is obtained by subtracting leftward from right-  
1514 ward motion. This time-dependent signal comprises a deterministic component, associated with  
1515 the motion strength and direction of each trial, and a stochastic component (i.e., each random  
1516 dot movie uses a unique random sequence of dots). Because only the latter provides informa-  
1517 tion about the time-course of decision formation, we subtracted from the motion energy profile  
1518 of each trial, the average motion energy associated with the strength and direction of motion of  
1519 that trial. The motion energy residuals were then averaged across trials, separately for 1D and 2D  
1520 trials (Fig. 3B).

1521 We performed a similar analysis to extract the color energy from the stimulus. We calculated  
1522 the difference between the number of blue and yellow dots shown on each video frame. We  
1523 subtracted the expectation of this difference, given by the color strength of the trial and the pre-  
1524 dominant color, to obtain the excess of color dots for blue over yellow. These calculations were  
1525 performed independently for each video frame; the visual system, however, blurs the color infor-  
1526 mation over time. Since we do not know the time constant of this operation, we used an impulse  
1527 response function that matches the motion filter (Fig. 3B). That is, we convolve the excess of color  
1528 dots with the temporal impulse response obtained from the motion energy filters. This choice does  
1529 not affect the conclusions we draw from this analysis – even if we used the unfiltered color residu-  
1530 als, we would still conclude that the same evidence samples were used to form color decisions in  
1531 1D and 2D trials.



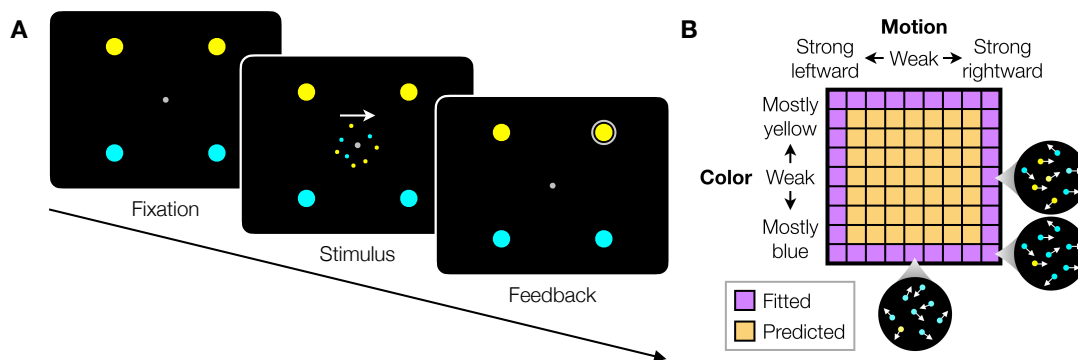

**Figure 1.** Double decision task. **A.** Timeline of the behavioral task. Participants first fixated a gray dot at the center of the screen. A dynamic random dot stimulus was displayed and the participant was asked to judge the overall motion direction and the dominant color (the arrow is for visualization purposes only and was not presented to the subject). They reported this double decision by selecting one of four targets to indicate motion direction (left and right target for leftward and rightward motion, respectively) and color (top yellow vs. bottom blue targets). The response was deemed correct when both motion and color judgments were correct. Participants received auditory feedback as to whether they were correct and the correct target was also indicated by a white ring. Across the experiments the targets could be indicated with an eye movement or a hand movement, either when the participant was ready to report (reaction time) or when the dot display was extinguished (experimenter-controlled duration). **B.** Motion and color strengths were varied independently across trials, represented by a matrix of combinations of difficulty levels (here shown for the eye reaction time experiment with 81 combinations; see Methods). Insets illustrate typical motion and color for three of the conditions. Correctness was assigned randomly when the coherence was zero. For the combinations shown in purple, at least one stimulus dimension was at its strongest value (easiest). For some analyses, the data from these combinations are used to fit a model, which is evaluated by predicting the data from the remaining combinations (yellow).

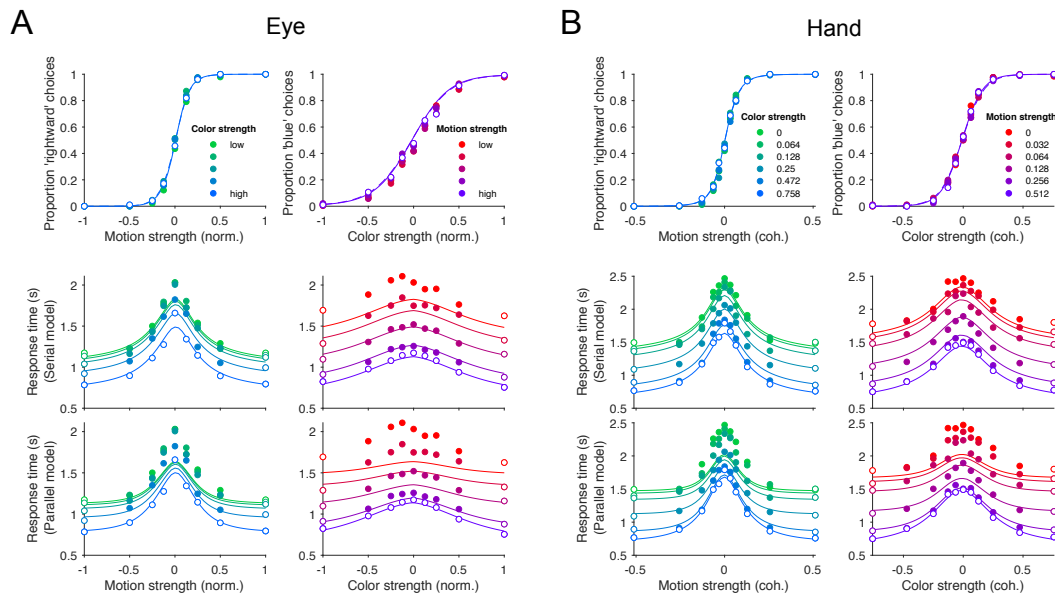

**Figure 2.** Double-decisions exhibit additive response times but no interference in accuracy. Participants judged the dominant color and direction of dynamic random dots and indicated the double-decision by an eye movement (A) or reach (B) to one of four choice-targets. All graphs show the behavioral measure (proportion of choices, top row; mean reaction time, rows 2 and 3) as a function of either signed motion or color strength. Positive and negative color strength indicate blue- or yellow-dominance, respectively. Positive and negative motion strength indicate rightward or leftward, respectively. Colors of symbols and traces indicate the difficulty (unsigned strength) of the other stimulus dimension (e.g., color, for the graphs with abscissae labeled “Motion strength”). Symbols are combined data from three participants (Eye) and eight participants (Hand). Open symbols identify the conditions used to fit the parallel and serial models. These are the conditions in which at least one of the two stimulus strengths was at its maximum (purple shading, Fig. 1B). The models comprise two bounded drift-diffusion processes, which explain the choice and decision times as a function of either color or motion. They differ only in the way they combine the decision times to explain the double-decision RT. For the serial model, the double decision time is the sum of the color and motion decision times. For the parallel model the double-decision time is the longer of the color and motion decisions (see Methods). Smooth curves are the predictions based on the fits to the open symbols. Both models predict no interaction on choice (top row). The serial predictions (middle row) are superior to the parallel model. Data are the same in the lower two rows. Stimulus strengths in A were not identical for the 3 participants and were combined to a common scale.

**Figure 2-Figure supplement 1.** Statistical comparison of the drift diffusion model under serial vs. parallel rules.

**Figure 2-Figure supplement 2.** Comparison of parallel and serial rules applied to reaction time distributions.

**Figure 2-Figure supplement 3.** Statistical comparison of parallel and serial rules applied to reaction time distributions.

**Figure 2-Figure supplement 4.** Mean reaction time for parallel and serial rules applied to the reaction time distribution analysis.

**Figure 2-Figure supplement 5.** Mean reaction time for parallel and serial rules applied to reaction time distribution analysis with the fit-prediction approach

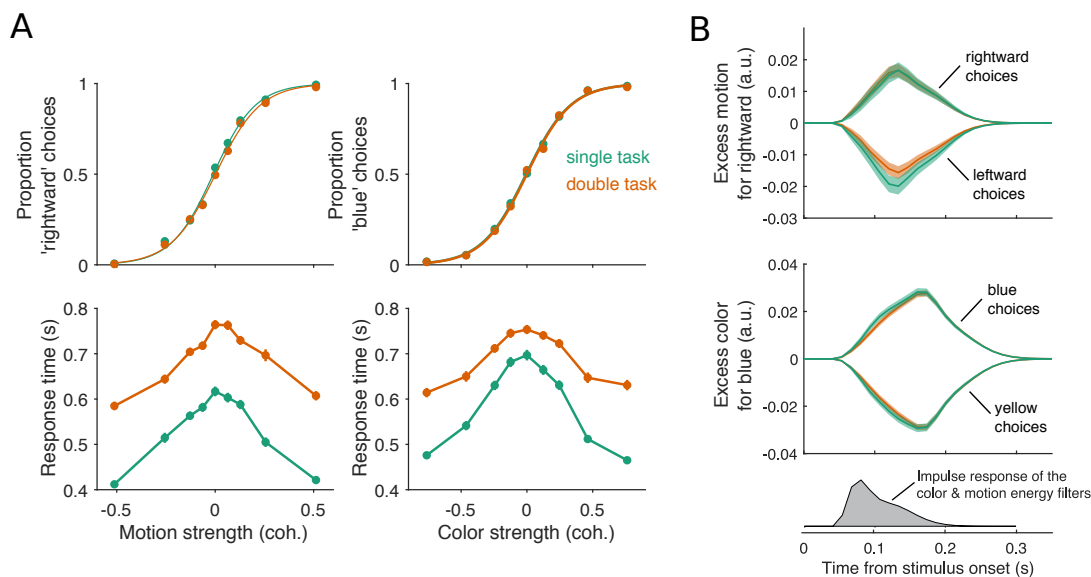

**Figure 3.** Parallel acquisition and serial incorporation of a brief color-motion pulse. Participants completed a short-duration variant of the double-decision task in which the stimulus was presented for only 120 ms. They also performed blocks in which they were asked to report only the color or only the motion direction (single decision in which they could ignore the irrelevant dimension). Data from double- and single-decision blocks are indicated by color. **A.** Choice probability and response times for single and double decision blocks. *Top-left*, proportion of rightward choices as a function of motion strength. *Top-right*, proportion of blue choices as a function of color strength. The solid lines are logistic fits. They are nearly identical for single- and double-decisions. *Bottom row*, Response times for the single- and double-decisions plotted as a function of motion strength (left) and color strength (right). For the double decisions, these are the same data plotted as a function of either the motion or color dimension. (Three participants performed a total 9,959 double-decision and 12,527 single-decision trials). Data points show the average response time as a function of motion or color coherence, after grouping trials across participants and all strengths of the “other” dimension (i.e., color, *left*; motion, *right*). Error bars indicate s.e.m. across trials. Although the stimulus was presented for only 120 ms, response times were modulated by decision difficulty. Importantly, response times were longer in the double-decision task than in the single-decision task. **B.** Psychophysical reverse correlation analysis. *Top*, Time course of the average motion information favoring rightward, extracted from the random-dot display on each trial, that gave rise to a left or right choice. Shading indicates s.e.m. *Middle*, Time course of the average color information favoring blue, extracted from the random-dot display on each trial, that gave rise to a blue or yellow choice. The shaded area indicates the s.e.m. across trials. The similarity of the green and orange curves indicates that participants were able to extract the same amount of information from the stimulus when making single- and double-decisions. *Bottom*, Impulse response of the filters used to extract the motion and color signals (see Methods). They explain the long time course of the traces for the 120 ms duration pulse.

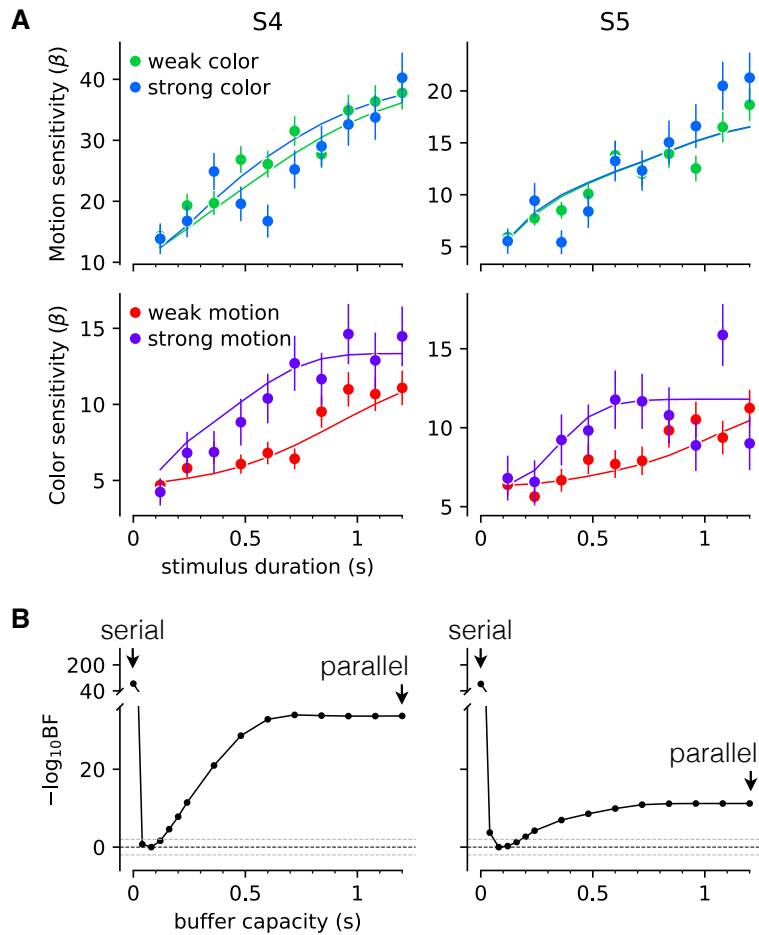

**Figure 4.** Interference in choice accuracy can be elicited at intermediate viewing durations. Two participants (columns) performed the color-motion double-decision task with a random dot display that varied in duration between 120 and 1200 ms. **A. Top**, Motion sensitivity as a function of stimulus duration and color strength. Symbols are the slope of a logistic fit of the proportion of rightward choices as a function of signed motion strength, for each stimulus duration. Data are split by whether the color strength was strong (blue) or weak (green). Error bars are s.e. **Bottom**, Analogous color-sensitivity split by whether the motion strength was strong (purple) or weak (red). Curves are fits to the data from each participant using two bounded drift diffusion models that operate serially after an initial stage of parallel acquisition, here termed the buffer capacity. During the serial phase, one of the dimensions is prioritized until it terminates. The prioritization favored motion for both participants ( $p_{\text{motion-1st}} = 0.80$  and  $0.96$ , for participants S4 and S5, respectively). **B.** Negative log likelihood of the model fits as a function of the buffer capacity, relative to the model fit at 80 ms capacity. The model is equivalent to a purely serial model, when the buffer capacity is zero, and to a purely parallel model when the buffer capacity exceeds the maximum stimulus duration. Negative log likelihoods were computed for a discrete set of buffer capacities (black points). Black dashed lines are at Bayes factor = 1 ( $\log_{10}BF = 0$ ). Gray dashed lines show where the Bayes factor = 100 (“decisive” evidence for the best fit model compared to the models above the line; *Kass and Raftery 1995*).

**Figure 4-Figure supplement 1.** Parameter recovery analysis

**Figure 4-Figure supplement 2.** Fits to the choice data with strictly serial and parallel models

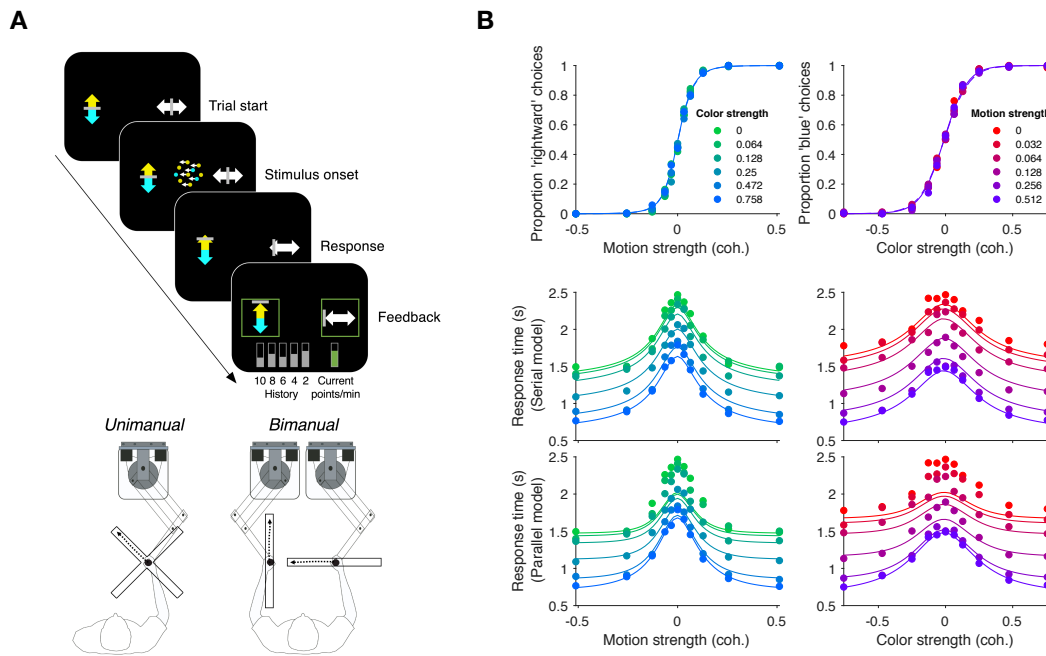

**Figure 5.** Replication of double-decision choice-reaction time when the decisions are reported with two effectors. **A.** Participants performed the color-motion double-decision choice-reaction task, but indicated the double-decision with either a unimanual movement to one of four choice-targets or a bimanual movement in which each hand reports one of the stimulus dimensions (N=8 participants performed both tasks in a counterbalanced order). In both conditions the hand or hands were constrained by a robotic interface to move only in directions relevant for choice (rectangular channels). The display was the same across unimanual and bimanual tasks with up-down movement reflecting color choice and left-right movement reflecting motion choice. A scrolling display of proportion correct was used to encourage accuracy. In the unimanual trials both choices were indicated simultaneously. However, in the bimanual trials each choice could be indicated separately and the dot display disappeared only when the second hand left the home position. **B.** Choice proportions and double-decision mean RT on the bimanual task. The double-decision RT on the bimanual task is the latter of the two hand movements. The data are plotted as a function of either signed motion or color strength (abscissae), with the other dimension shown by color (same conventions as in Fig. 2). Solid traces are identical to the ones shown in Fig. 2 for the unimanual task, generated by the method of fitting the conditions containing at least one stimulus condition at its maximum strength and predicting the rest of the data. They establish predictions for the bimanual data from the same participants. The agreement supports the conclusion that the participants used the same strategy to solve the bimanual and unimanual versions of the task.

**Figure 5-Figure supplement 1.** Choice and double-decision reaction time for the bimanual responses

**Figure 5-Figure supplement 2.** Model-free comparison of performance in the unimanual (blue) vs. bimanual (red) task.



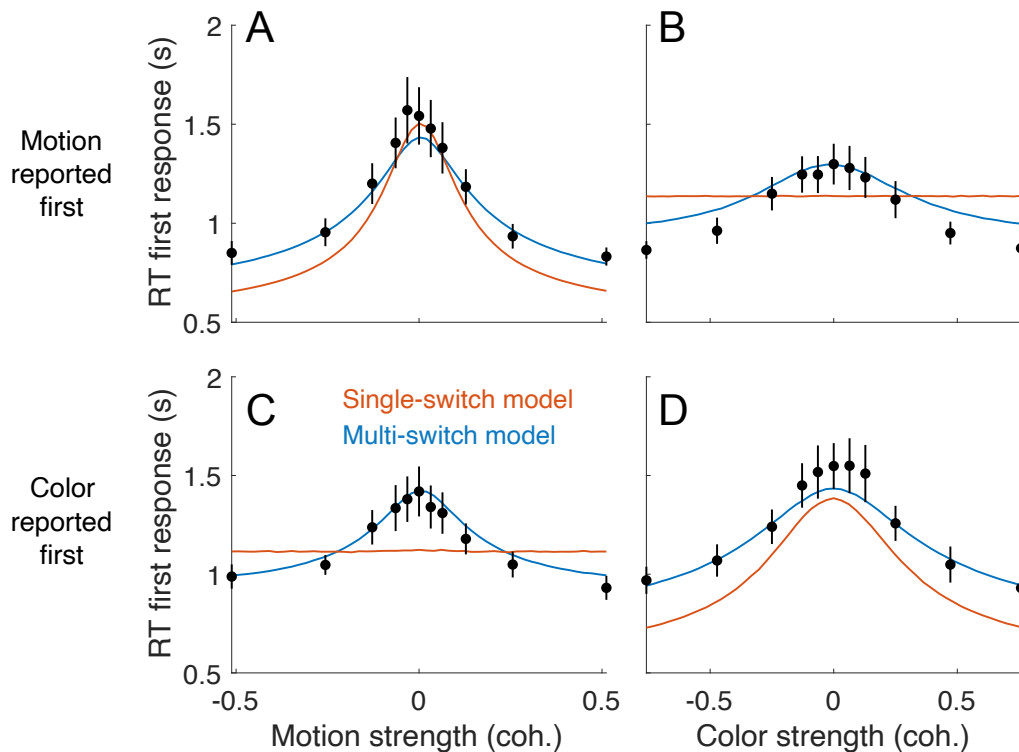

**Figure 6.** First RT response times in the bimanual task suggest multiple switches in decision updating. For bimanual double decisions, participants indicate two RTs per trial. Whereas up to now we have only considered the RT corresponding to completion of both color and motion decisions, the analyses in this figure concern the RT of the first of the two. Symbols are means  $\pm$  s.e. (N=8 participants). Curves are fits to single- and multi-switch model (colors). **A.** RT as a function of motion strength when motion was reported first. **B.** RT as a function of color strength when motion was reported first. **C.** RT as a function of motion strength when color was reported first. **D.** RT as a function of color strength when color was reported first. In panels A and D, the 1st response corresponds to the stimulus dimension represented on the abscissa. The data exhibit the expected pattern fast RT when the stimulus is strong and slow RT when the stimulus is weak (i.e., near 0). This would occur if the serial processing of motion and color ensued one after the other (single-switch) or with more than one alternation (multi-switch), although the latter provides a better account of the data. In panels B and C, the 1st response corresponds to the stimulus dimension that is not represented on the abscissa. Here the single-switch model fails to account for the data. If there were only one switch and color terminates first, then the strength of motion is irrelevant, because all processing time was devoted to color. Similarly, if there were only one switch and motion terminates first, then the strength of color is irrelevant, because all processing time was devoted to motion.

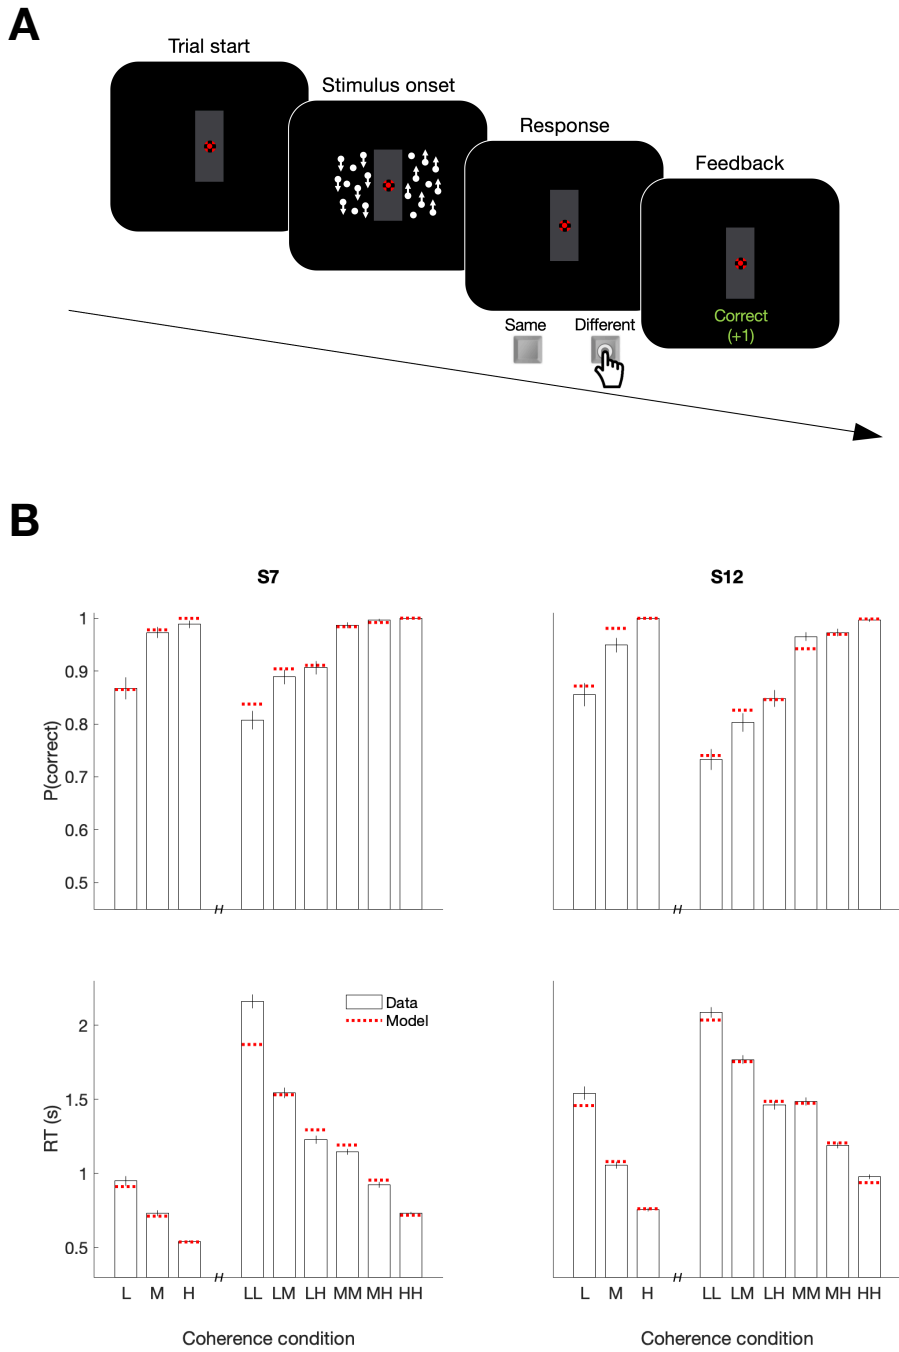

**Figure 7.** Serial decision making in a Same vs. Different task. **A.** Task. Two dynamic random dot motion displays were presented in rectangular patches to the left and one to the right of a central fixation cross. The direction and motion strength were randomized from trial to trial and between the patches (up or down  $\times$  three motion strengths). Participants judged whether the dominant direction of the left and right patches is the same or different and indicated the decision when ready by pressing a response key with their left or right index finger. At the end of each trial, participants received feedback. In a separate block, participants also performed a 1D direction discrimination task in which only one patch of random dots was displayed. **B. Top,** Proportion of correct choices as a function of the level of absolute motion strength (L = low; M = medium; H = High). **Bottom,** Reaction times for each level of motion strength. The first three bars represent the direction task where only a single motion stimulus was presented. The six bars on the right of each plot represent the same-different task. Horizontal red lines are fits of a serial drift-diffusion models to the means. Only correct trials were included for RT analyses.

**Figure 7-Figure supplement 1.** Comparison of parallel and serial rules applied to reaction time distributions in the Same vs. Different task

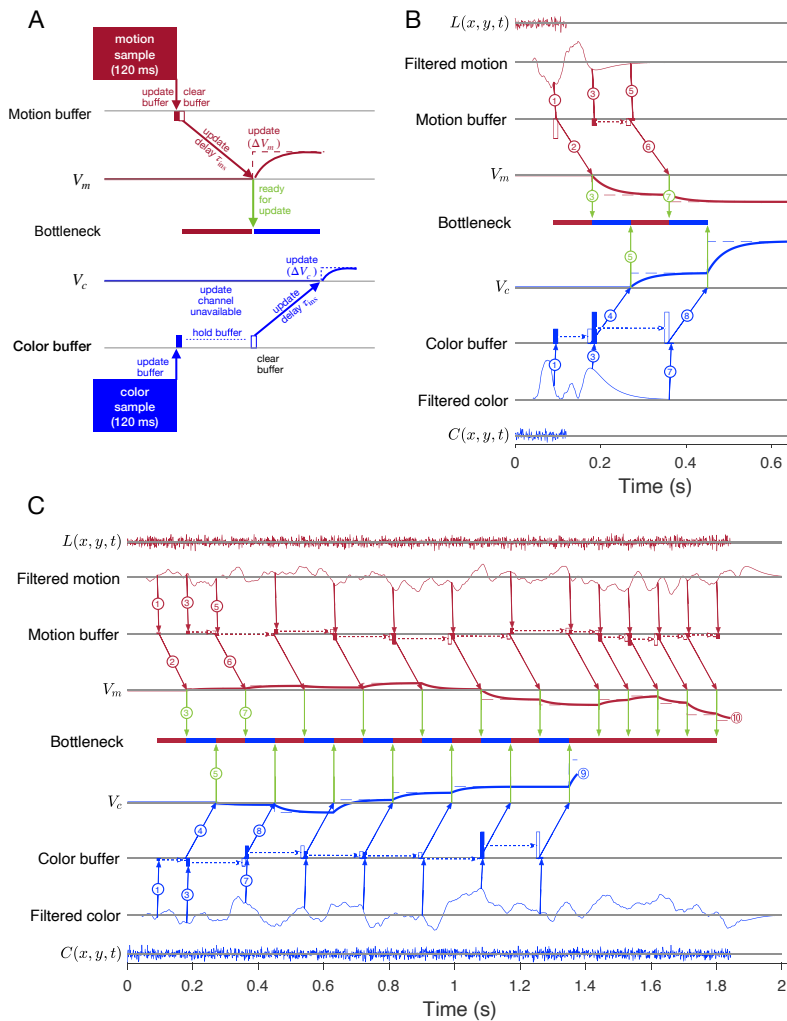

**Figure 8.** Parallel acquisition of evidence and serial updating of two decision variables. An elaborated drift diffusion model permits reconciliation of the serial processing implied by the double-decision choice-RT experiment and the failure to observe interference in choice accuracy when the color-motion stimulus is restricted to a brief pulse. The main components of the model are introduced in panel A and elaborated in panels B and C. In all panels, red and blue indicate motion and color processes, respectively. **A.** Simulated trial from the short duration experiment. Information flows from top to bottom graphs for motion; and from bottom to top graphs for color. Time is left to right. The evidence from both color and motion is extracted from the 120 ms random dot stimulus in parallel. Both can be stored temporarily in separate buffers (filled rectangles), which send an instruction to the circuits representing the respective decision variables in their persistent firing rates. The instruction is to change the firing rate by an amount ( $\Delta V_m$  or  $\Delta V_c$ ). This latency from clearance of the sample from the buffer to receipt of the  $\Delta V$  instruction takes time ( $\tau_{ins}$ , black diagonal arrows), and this is followed by the realization of the instruction in the evolving firing rates of cortical neurons (smooth colored curves). In the example, the  $V_m$  is the first to update. A central bottleneck precludes updating  $V_c$ . The bottleneck is cleared when the  $\Delta V_m$  instruction is received by the circuit that represents the motion decision variable (green arrow). This allows the buffered evidence for color to update  $V_c$ . Open rectangle represents clearance of the buffer content, which occurs immediately for motion and after a delay for color in this example. Dashed lines associated with decision stage show the instructed change in the decision variable ( $\Delta V_m$  and  $\Delta V_c$ ). Smooth colored curves show the evolution of the decision variables. **B.** Elaboration of the example in panel-A. The boxes representing the 120 ms stimulus are replaced by the two outer rows: (i) raw luminance and color data stream,  $L(x, y, t)$  and  $C(x, y, t)$ , respectively, represented as biased Wiener processes (duration 120 ms); (ii) filtered evidence streams containing the relevant motion (right minus left) and color (blue minus yellow) signals. The filters introduce a delay and smoothing. The filtered signals can be sampled by the buffer every  $\tau_s$  ms, so long as the buffer is available (i.e., empty). The bottleneck shows the process that is accessing the update channel. Other than the first sample, the prioritization is equal and alternating. Only one process can update at a time. Circled numbers identify the key events described in Results. Events sharing the same number are approximately coincidental. **C.** Example of a double-decision in the choice-reaction time task. The first eight steps parallel the logic of the process shown in panel B. The decision variables then continue to update serially, in alternation, until  $V_c$  reaches a terminating bound (⑨). The decisions then continues as a 1D motion process until  $V_m$  reaches a terminating bound (⑩). Bound height is indicated by ⑨ and ⑩. Note that the sampling rate is the same as it was in the parallel phase, whereas during alternation it was half this rate for each dimension.

1532 **Tables**

|                                                       | choice-RT (eye)    | brief duration (eye) | variable duration (eye)  | choice-RT (arm)          | binary choice-RT                |
|-------------------------------------------------------|--------------------|----------------------|--------------------------|--------------------------|---------------------------------|
| Dot density (dots deg <sup>-2</sup> s <sup>-1</sup> ) | 15.3               | 15.3                 | 16                       | 16                       | 16                              |
| Dot speed (deg/s)                                     | 1.67               | 1.67                 | 5                        | 5                        | 5                               |
| Central fixation diameter (deg)                       | 0.4 gray circle    | 0.4 gray circle      | 0.6 red cross & bullseye | 0.6 red cross & bullseye | 0.6 red cross & bullseye        |
| Random delay (s)                                      | 0.1-0.5            | 0.1-0.5              | 0.5-0.8                  | 0.5-0.8                  | 0.4-0.8                         |
| Choice target diameter (deg)                          | 0.4                | 0.4                  | 1.2                      | N/A                      | N/A                             |
| Target spacing (deg)                                  | 6                  | 6                    | 15                       | N/A                      | N/A                             |
| Movement initiation                                   | gaze > 2.5°        | gaze > 2.5°          | gaze > 3°                | hand > 1 cm              | key press                       |
| CRT                                                   | Vision Master 1451 | Vision Master 1451   | Sony CRT CPD-G420S       | Dell CRT P1110           | N/A                             |
| Resolution (pixels)                                   | 1400 × 1050        | 1400 × 1050          | 1280 × 1024              | 1280 × 1024              | S7: 1280 × 720; S12: 1440 × 900 |
| Pixels per degree                                     | 39.6               | 39.6                 | 32.7                     | 24.3                     | S7: 40.94; S12: 33.45           |
| Viewing distance (cm)                                 | 55                 | 55                   | 50                       | 38                       | S7: 54; S12: 38                 |
| Cyan <i>cd/m<sup>2</sup></i> [M(SD)]                  | N/A                | N/A                  | 25.20 (0.81)             | 12.16 (1.93)             | N/A                             |
| Cyan CIE x/y [M]                                      | N/A                | N/A                  | x = 0.26, y = 0.24       | x = 0.27, y = 0.24       | N/A                             |
| Yellow <i>cd/m<sup>2</sup></i> [M(SD)]                | N/A                | N/A                  | 22.98 (0.05)             | 12.68 (1.80)             | N/A                             |
| Yellow CIE x/y [M]                                    | N/A                | N/A                  | x = 0.54, y = 0.38       | x = 0.54, y = 0.38       | N/A                             |

**Table 1. Experimental parameters.**

| experiment              | participant | motion strengths                     | color strengths                      |
|-------------------------|-------------|--------------------------------------|--------------------------------------|
| choice-RT (eye)         | S1          | 0, 0.064*, 0.128, 0.256*, 0.512      | 0, 0.062*, 0.124, 0.245*, 0.462      |
|                         | S2          | 0, 0.032*, 0.064, 0.128*, 0.256      | 0, 0.031*, 0.062, 0.124*, 0.245      |
|                         | S3          | 0, 0.032*, 0.064, 0.128*, 0.256      | 0, 0.062*, 0.125, 0.245*, 0.462      |
| brief duration (eye)    | S1–S3       | 0, 0.064*, 0.128, 0.256*, 0.512      | 0, 0.124*, 0.245, 0.462*, 0.762      |
| variable duration (eye) | S4          | 0.03, 0.063, 0.512                   | 0.052, 0.104, 0.758                  |
|                         | S5          | 0.044, 0.084, 0.512                  | 0.046, 0.104, 0.758                  |
| choice-RT (arm)         | S6–S13      | 0, 0.032, 0.064, 0.128, 0.256, 0.512 | 0, 0.064, 0.128, 0.250, 0.472, 0.758 |
| binary choice-RT        | S7 & S12    | 0.128, 0.256, 0.512                  | N/A                                  |

**Table 2. Motion and color strength parameters.** For 2D trials all combinations of motion and color strengths were used. For 1D trials all strengths were used for the dimension that informed the decision but some strengths (\*) were omitted for the other dimension.

| participant ID | $\tau_{\Delta}$ (s) | $p_{\text{motion-1st}}$ | $T_{\text{nd}}^{\text{1st}}$ (s) |
|----------------|---------------------|-------------------------|----------------------------------|
| 6              | 1.93                | 0.52                    | 0.51                             |
| 7              | 1.6                 | 0.15                    | 0.59                             |
| 8              | 4.49                | 0.86                    | 0.38                             |
| 9              | 1.33                | 0.87                    | 0.44                             |
| 10             | 0.15                | 0.14                    | 0.38                             |
| 11             | 0.22                | 0.89                    | 0.7                              |
| 12             | 0.1                 | 0.79                    | 0.52                             |
| 13             | 1.13                | 0.85                    | 0.69                             |

**Table 3.** Parameter values for the best-fitting switching model.

| Task      | Subj.    | $\kappa_m$ | $u_m$ | $a_m$ | $d_m$ (s) | $s_m^0$ | $\kappa_c$ | $u_c$ | $a_c$ | $d_c$ (s) | $s_c^0$ | $\mu_{nd}$ (s) | $\sigma_{nd}$ (s) |       |
|-----------|----------|------------|-------|-------|-----------|---------|------------|-------|-------|-----------|---------|----------------|-------------------|-------|
| Eye RT    | 1        | 9.97       | 0.98  | 6.45  | 3.47      | -0.02   | 5.77       | 0.83  | 10    | 4         | -0.01   | 0.3            | 0.001             |       |
|           | 2        | 21.99      | 0.99  | 3.65  | 2.52      | 0.01    | 11.39      | 0.68  | 10    | 2.61      | 0.02    | 0.35           | 0.002             |       |
| Unimanual | 3        | 39.25      | 0.83  | 9.91  | 3.26      | -0.01   | 6.29       | 3.62  | 1.23  | -0.19     | 0       | 0.31           | 0.004             |       |
|           | 6        | 13.93      | 1.29  | 2.11  | 3.96      | 0.01    | 7.29       | 0.91  | 3.09  | 2.16      | 0.04    | 0.34           | 0.001             |       |
|           | 7        | 13.69      | 1.38  | 2.18  | 3.61      | -0.01   | 4.69       | 1.11  | -2    | -1.97     | 0.06    | 0.46           | 0.002             |       |
|           | 8        | 9.95       | 1.11  | 3.89  | 4         | 0       | 7.19       | 1.02  | 2.28  | 2.9       | 0.02    | 0.32           | 0.002             |       |
|           | 9        | 16.24      | 1.04  | -2    | 0         | 0       | 6.24       | 0.88  | 10    | 3.28      | 0.01    | 0.74           | 0.08              |       |
|           | 10       | 20.84      | 0.88  | 10    | 4         | -0.01   | 7.38       | 1.59  | 0.15  | 2.24      | -0.06   | 0.36           | 0.001             |       |
|           | 11       | 20.12      | 0.84  | 2.93  | 2.79      | 0       | 8.35       | 0.87  | 4.47  | 1.92      | -0.03   | 0.45           | 0.032             |       |
|           | 12       | 11.98      | 0.96  | 2.52  | 4         | 0       | 5.29       | 0.97  | 1.76  | 3.92      | 0.04    | 0.43           | 0.002             |       |
|           | 13       | 13.15      | 1     | 2.05  | 4         | -0.02   | 5.79       | 1.01  | 1.19  | 3.09      | 0.01    | 0.41           | 0.001             |       |
|           | Bimanual | 6          | 7.88  | 0.75  | 10        | 3.45    | 0          | 4.34  | 0.98  | 10        | 4       | 0.04           | 0.3               | 0.069 |
|           |          | 7          | 8.19  | 0.82  | 10        | 4       | -0.03      | 4.8   | 0.96  | 7.97      | 3.91    | 0.05           | 0.29              | 0.001 |
| 8         |          | 11.75      | 2.65  | 0.46  | -0.56     | -0.04   | 6.85       | 1.06  | 1.57  | 1.87      | -0.02   | 0.35           | 0.001             |       |
| 9         |          | 13.57      | 0.87  | 10    | 4         | 0       | 7.08       | 0.86  | 4.46  | 2.5       | -0.1    | 0.44           | 0.001             |       |
| 10        |          | 13.15      | 1.36  | 1.48  | 3.82      | 0       | 6.77       | 2.36  | 0.18  | -0.61     | 0.07    | 0.37           | 0.02              |       |
| 11        |          | 12.72      | 1.4   | 1.21  | 2.7       | 0       | 6.84       | 0.96  | 2.32  | 3.03      | 0.05    | 0.47           | 0.002             |       |
| 12        |          | 12.74      | 1.03  | 6.37  | 3.33      | 0.01    | 5.98       | 1.13  | 1.37  | 3.66      | -0.03   | 0.3            | 0.001             |       |
|           | 13       | 9.08       | 1.14  | 5.81  | 3.87      | 0.01    | 3.79       | 0.99  | 10    | 3.69      | -0.1    | 0.31           | 0.001             |       |

**Table 4.** Parameter values for the best-fitting serial model. Note that the rate of collapse parameters  $a_m$  and  $a_c$  are limited to a maximum of 10 (an almost instantaneous bound collapse) and the time of the start of the collapse  $d_m$  and  $d_c$  are limited to 4 s.

| Task | Subj. | $\kappa_m$ | $u_m$ | $g_m$ (s) | $d_m$ (s) | $s_m^0$ | $\kappa_c$ | $u_c$ | $g_c$ (s) | $d_c$ (s) | $s_c^0$ | $p_{\text{motion-1st}}$ |
|------|-------|------------|-------|-----------|-----------|---------|------------|-------|-----------|-----------|---------|-------------------------|
| VD   | 4     | 22.29      | 0.86  | 0.47      | 1.19      | 0.01    | 9.18       | 1.39  | 0.18      | 0.27      | -0.01   | 0.80                    |
|      | 5     | 9.60       | 0.99  | 0.68      | 0.40      | 0.01    | 12.11      | 0.74  | 0.11      | 0.11      | 0.04    | 0.96                    |

**Table 5.** Parameter values for the best-fitting buffer + serial model.



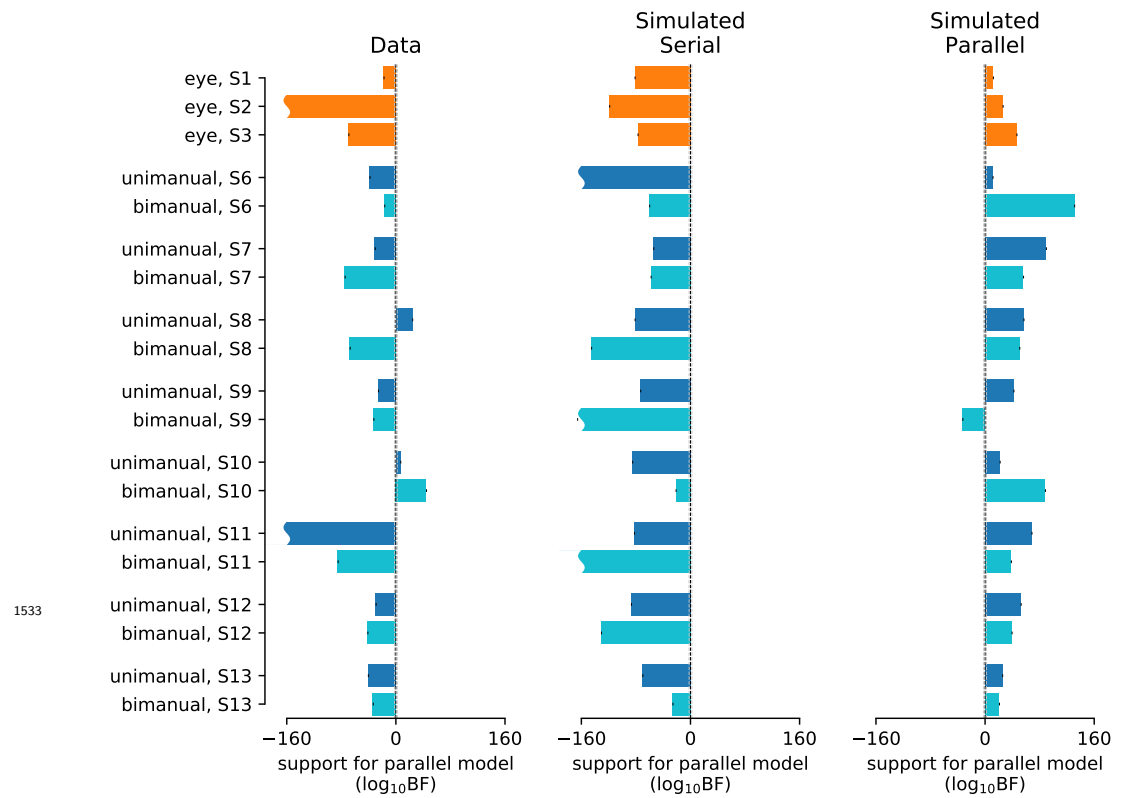

**Figure 2-Figure supplement 1.** Statistical comparison of the drift diffusion model under serial vs. parallel rules. The analysis focuses on the data and predictions represented by the solid symbols and lines in Fig. 2. *Left*, Difference in log likelihood of the predictions under parallel and serial rules for each participant and condition. Gray vertical dashed lines (close to the midline) show where the Bayes factor is 1/100 and 100 ( $\log_{10}\text{BF} = -2$  and  $2$ ; “decisive” evidence in support of the model on that side; *Kass and Raftery 1995*). Negative and positive values correspond to support for the serial and parallel model, respectively. *Middle and right*, Validation of the method. After fitting, these parameters were used to generate simulated data under the serial (left) and parallel (right) rules. Each dataset was then fit using both the serial and parallel rule. The validation shows that 37/38 simulated datasets were correctly categorized. Average  $\log_{10}\text{BF} \pm \text{SEM}$  are  $-58 \pm 20$ ,  $-101 \pm 14$ ,  $44 \pm 8$  for the data, simulated serial, and simulated parallel, respectively.

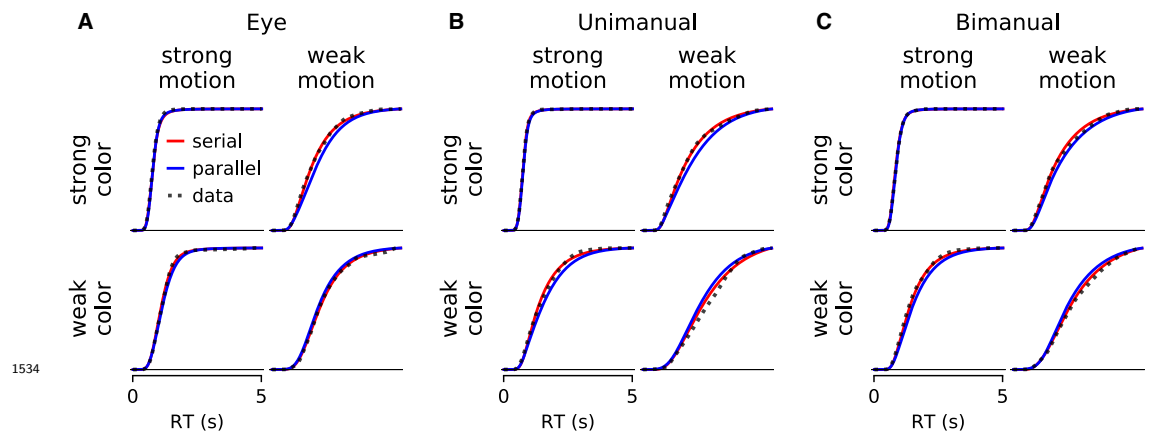

**Figure 2-Figure supplement 2.** Comparison of parallel and serial rules applied to reaction time distributions. The graphs show averages of the fitted distributions (thick colored traces) across participants. **A.** 3 participants who responded with an eye movement to one of four targets. **B.** 8 participants who responded with a hand movement to one of four targets. **C.** The same 8 participants who responded with two hands (the RT is the time of the last movement). The averages are taken at each time bin across participants for each condition, weighted by the number of trials. Only the conditions with the weakest and strongest stimulus strengths are shown. The comparison provides strong support for the serial combination rule (see *Figure 2-Figure Supplement 3*).

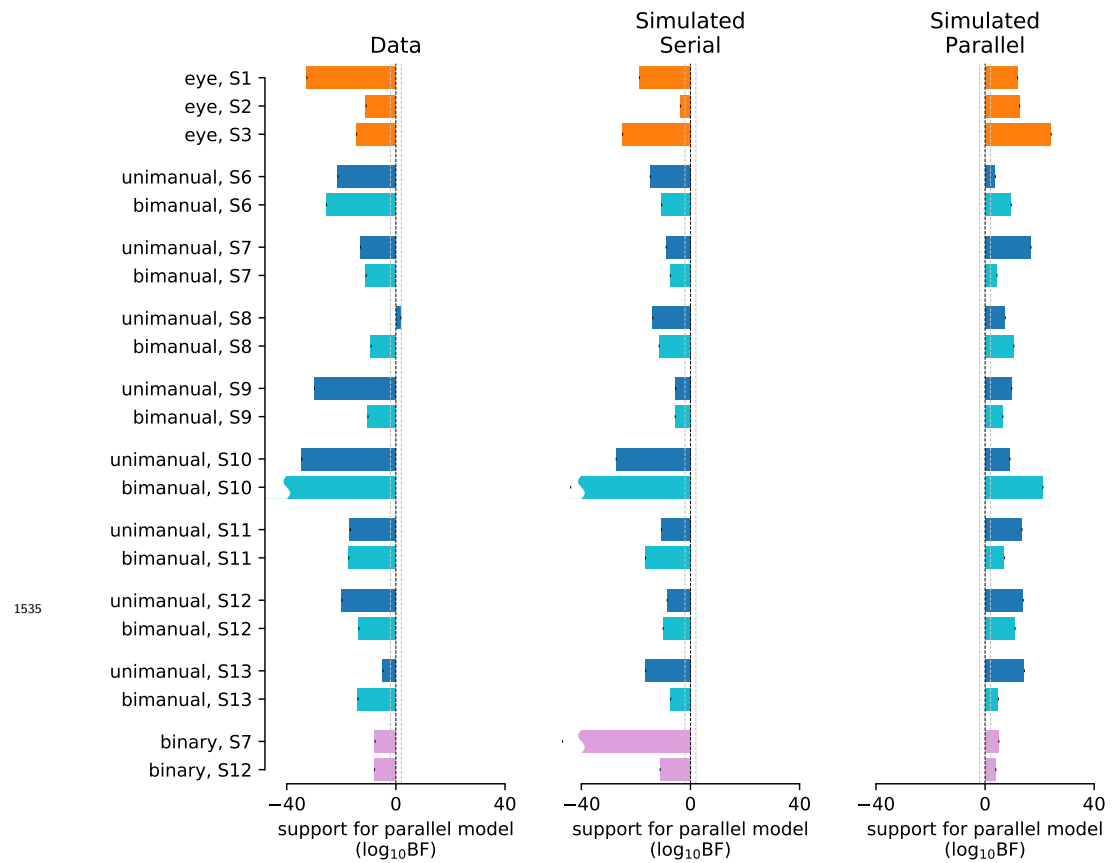

**Figure 2-Figure supplement 3.** Statistical comparison of parallel and serial rules applied to reaction time distributions. The analysis focuses on the full set of RT distributions, exemplified in *Figure 2-Figure Supplement 2*. The results are presented in the same format as *Figure 2-Figure Supplement 1*. Average  $\log_{10}BF \pm SEM$  are  $-17 \pm 2$ ,  $-16 \pm 2$ ,  $10 \pm 1$  for the data, simulated serial, and simulated parallel, respectively. For the binary-choice task (pink), the simplified version of the RT model was used and 20 simulations were performed for each participant under the serial and parallel rule, respectively (bars represent the mean across the 20 simulations). For the remaining data, the full RT model was used and only a single serial/parallel simulation was performed for each participant.

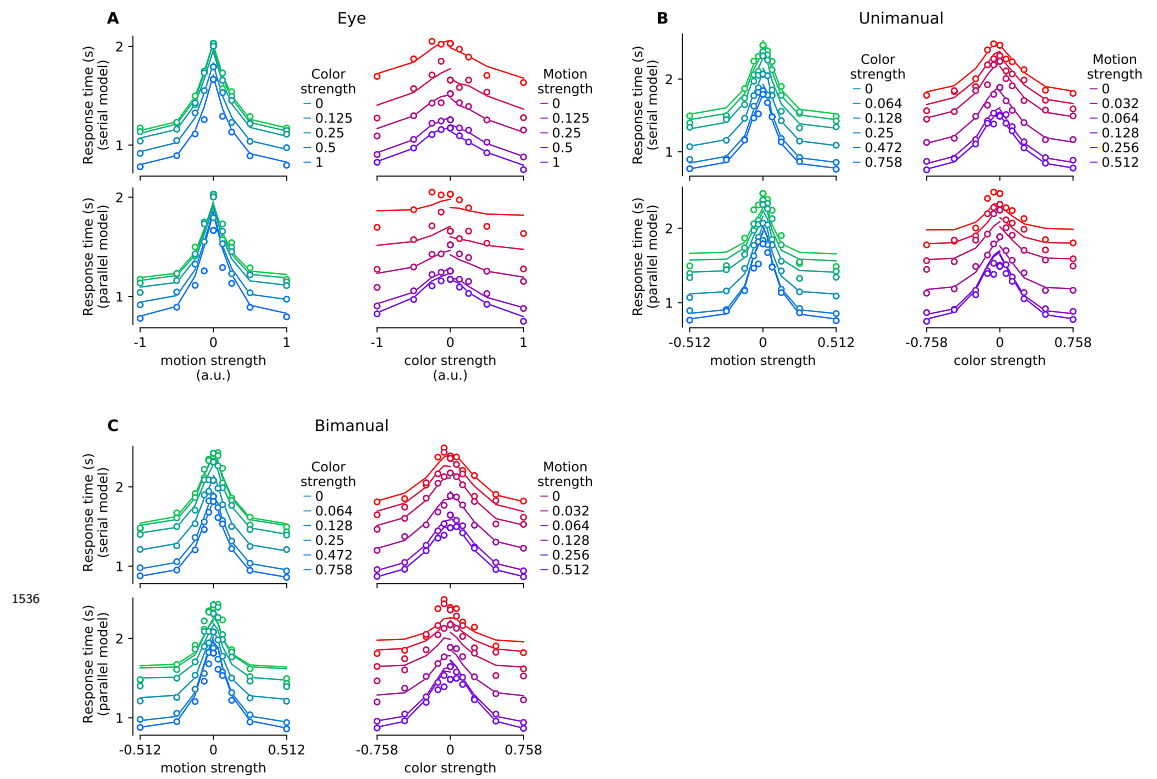

**Figure 2-Figure supplement 4.** Mean reaction time for parallel and serial rules applied to the reaction time distribution analysis exemplified in *Figure 2-Figure Supplement 2*. The graphs display the mean RTs and fits in the same format as Fig. 2, with responses reported by eye (**A**), unimanually (**B**), or bimanually (**C**). Mean RTs are computed from the average RT distribution computed as in *Figure 2-Figure Supplement 2* for correct choice trials within each condition (or for the zero stimulus strength condition, all trials). Note that these averages across time bins and across participants are used for visualization only; fits were performed for individual participants using the full RT distribution. Here, the fits are derived from the best fitting gamma distributions, described in association with *Figure 2-Figure Supplement 3*. Open symbols are the data; the traces are line segments connecting the fitted means. In each panel of four graphs, the upper and lower pair of graphs show fits to the serial and parallel models, respectively. Panels display data from the double-decision RT tasks using the three response modalities as indicated.

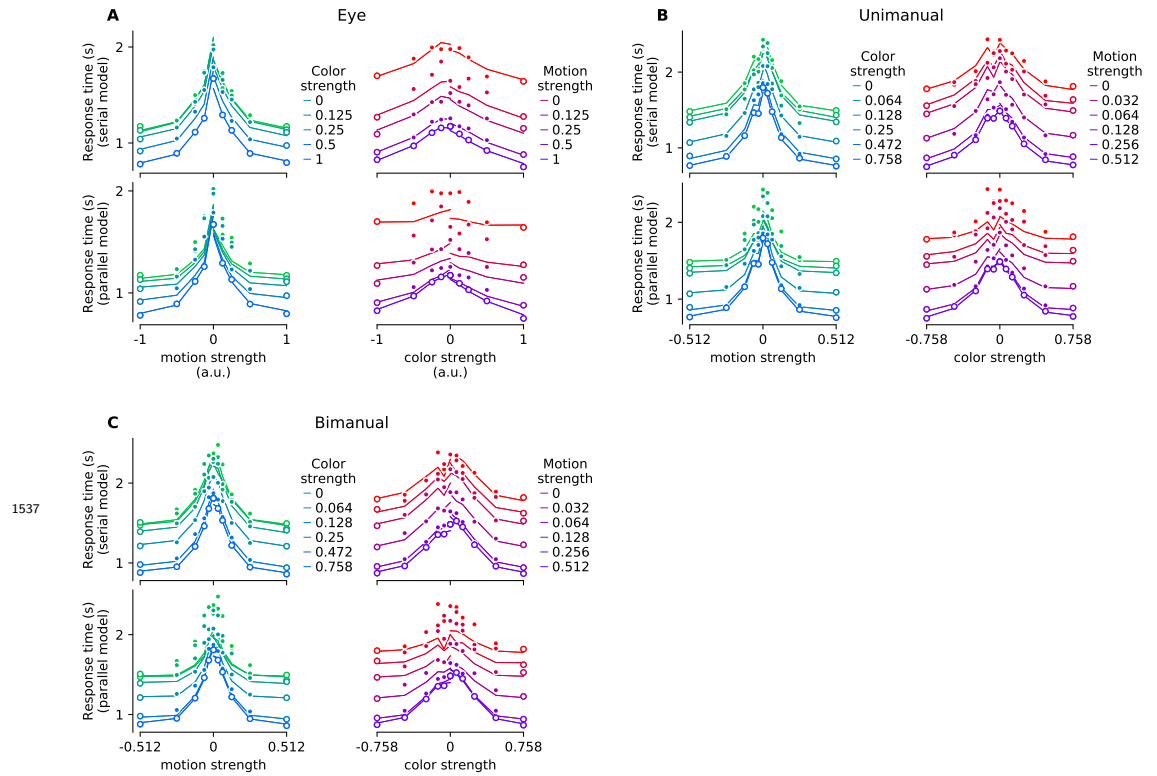

**Figure 2-Figure supplement 5.** Mean reaction time for parallel and serial rules applied to reaction time distribution analysis with the fit-prediction approach. Format is identical to *Figure 2-Figure Supplement 4*, except the fits of the marginal 1D distributions were obtained using only the conditions where color or motion strength was at its strongest level. The symbols corresponding to these 'fitted' conditions are open. Where the symbols are solid, the data are not fit, but predicted by the serial or parallel logic (traces). Responses were reported by eye (**A**), unimanually (**B**), or bimanually (**C**).

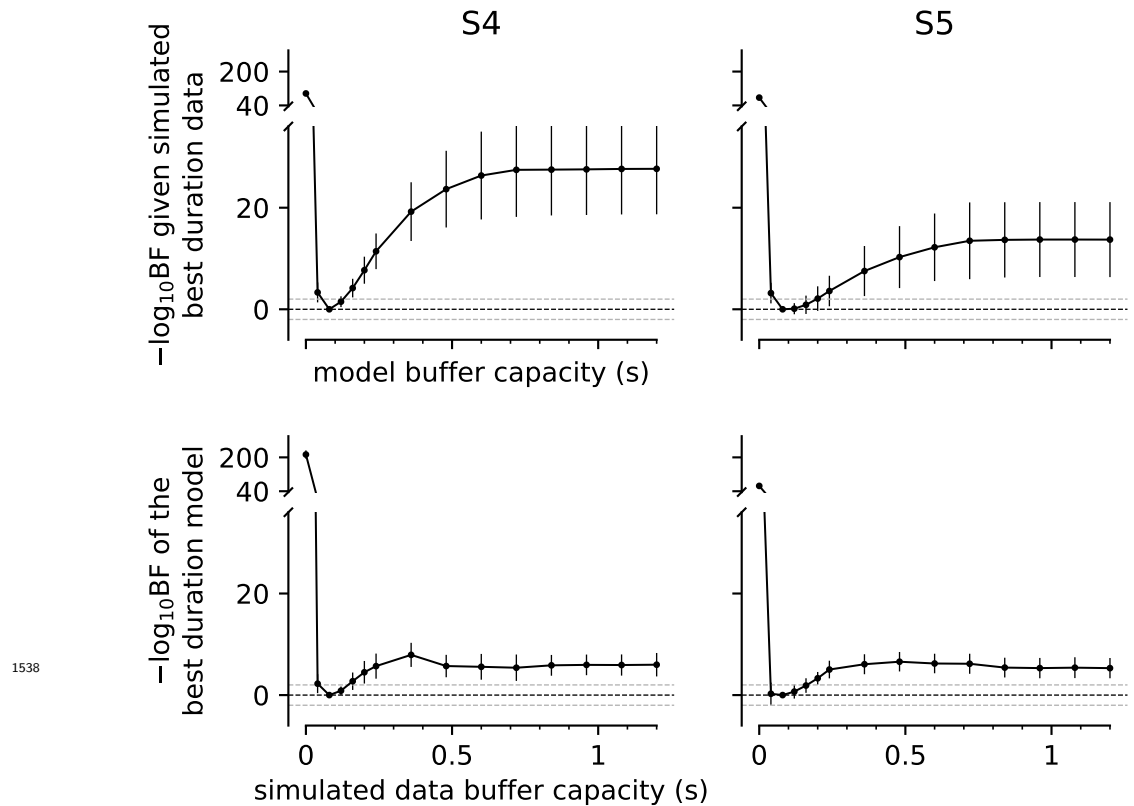

**Figure 4-Figure supplement 1.** Parameter recovery analysis. The graphs evaluate the sensitivity and specificity of the estimates of buffer capacity ( $T_{\text{buf}}$ ) shown in Fig. 4. Columns are the two participants. We used the parameters of the best fitting diffusion models to the data in Fig. 4 (solid curves; see Table 5). The analysis in the top row addresses specificity. The simulations use 80 ms, but the model fits used  $T_{\text{buf}}$  fixed to each of the durations shown on the abscissa, computed for a discrete set of buffer capacities (black points). The ordinate shows the difference of each model's negative log likelihood from that of the 80-ms buffer model (smaller is better). Error bars are standard deviations across 12 simulations. Gray dashed lines show where the Bayes factor = 100 and 1/100 ("decisive" evidence for the best fit model compared to the models above the top line and against the best fit model below the bottom line; *Kass and Raftery 1995*). The analysis suggests fiducial confidence limits of roughly 80-200 ms. The analysis in the bottom row addresses identifiability. The simulations use  $T_{\text{buf}}$  shown on the abscissa. We then compare two fits, using  $T_{\text{buf}} = 80\text{ms}$  or the simulated value. Misidentification is limited to a narrow range similar to the fiducial confidence interval.



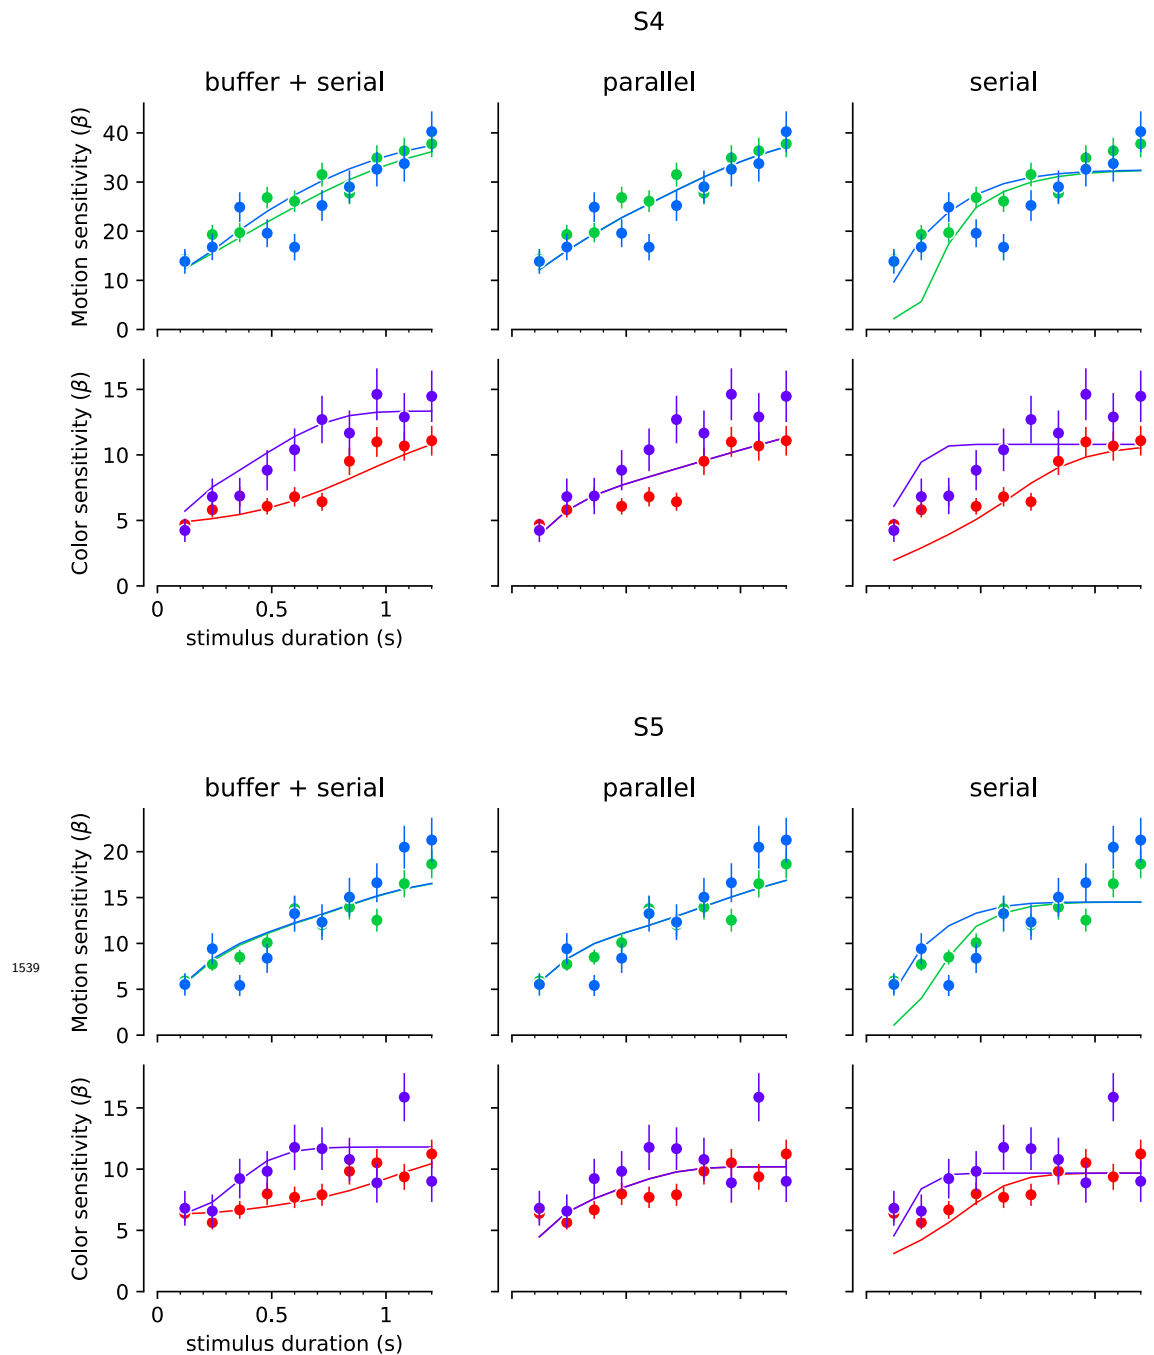

**Figure 4-Figure supplement 2.** Fits to the choice data with strictly serial and parallel models. The best fitting model to the choice data in the variable duration task implicates a finite buffer, allowing motion or color information to be held for a period before updating the decision. If  $T_{buf} = \infty$  or 0, the model is purely parallel or purely serial. The graphs show the best fits of these models for two subjects. The format of the graphs is identical to Fig. 4. *Left column*, reproduction of the fits in Fig. 4. *Middle column*, best fitting parallel model. *Right column*, best fitting serial model. Two participants (rows) performed the color-motion double-decision task with a random dot display that varied in duration between 120 and 1200 ms. *Top*, Motion sensitivity as a function of stimulus duration and color strength. Symbols are the slope of a logistic fit of the proportion of rightward choices as a function of signed motion strength, for each stimulus duration. Data are split by whether the color strength was strong (blue) or weak (green). Error bars are s.e. *Bottom*. Analogous color-sensitivity split by whether the motion strength was strong (purple) or weak (red). Curves are fits to the data from each participant using two bounded drift diffusion models that operate serially after an initial stage of parallel acquisition, here termed the buffer capacity. During the serial phase, one of the dimensions is prioritized until it terminates. The prioritization favored motion for both participants ( $p_{motion-1st} = 0.80$  and  $0.96$ , for participants S4 and S5, respectively)

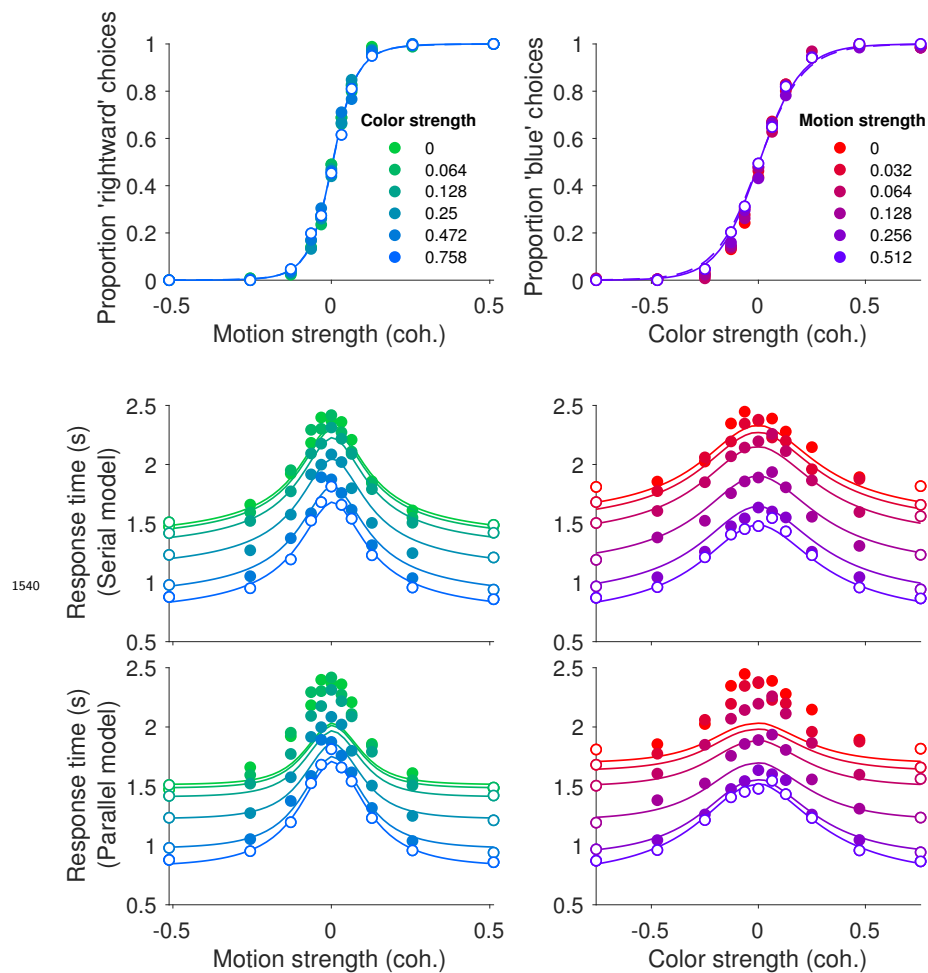

**Figure 5-Figure supplement 1.** Choice and double-decision reaction time for the bimanual responses in the same format as Fig. 2B. These are the same data shown in Fig. 5 but replacing the predictions from the unimanual fits with the fits to the data from the bimanual task. We use the same fit/prediction strategy as in Fig. 2B. The model comparison summarized in *Figure 2-Figure Supplement 1*.

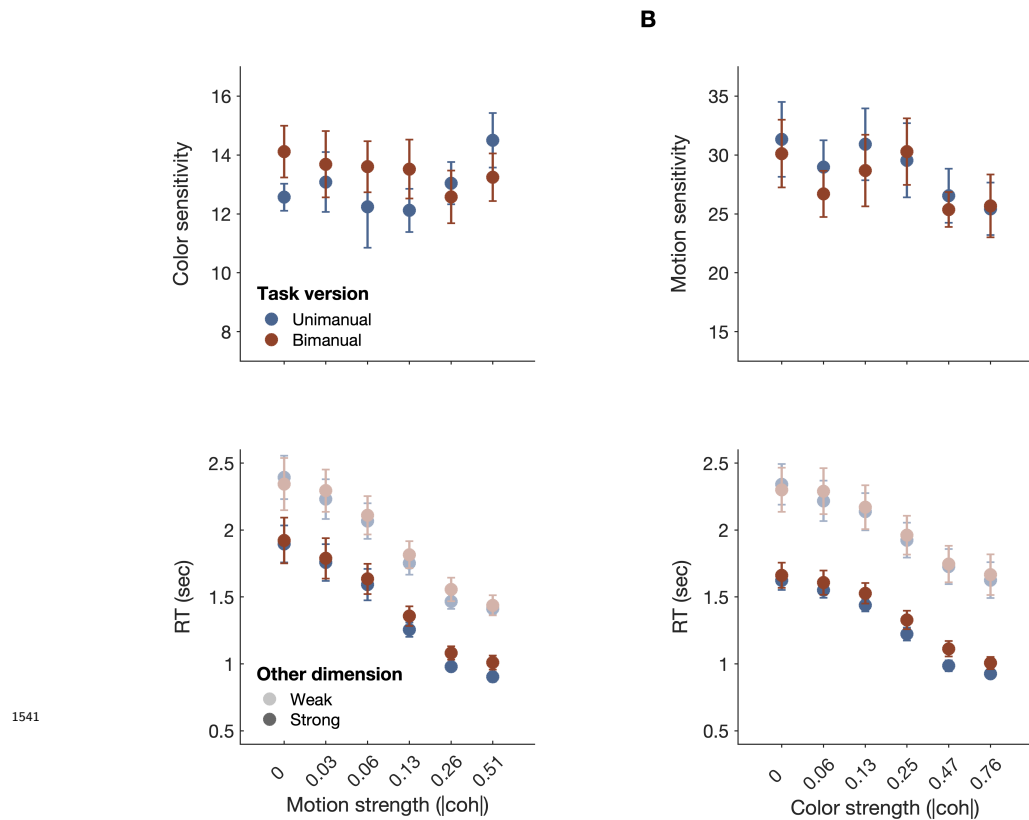

**Figure 5–Figure supplement 2.** Model-free comparison of performance in the unimanual (blue) vs. bimanual (red) task. **A. Top:** Sensitivity of color choices as a function of motion strength (absolute coherence). Sensitivity is the slope of a logistic regression of color choice as a function of signed color coherence, obtained separately for each level of motion strength. **Bottom:** RTs in the uni- vs. bimanual task as a function of absolute motion strength when color was weak (3 lowest strengths; light shading) vs. strong (3 highest strengths; dark shading). For the bimanual task, RTs correspond to the final response of a given trial. **B. Similar to A,** but with color strength on the abscissa. **Top:** motion sensitivity. **Bottom:** RTs as a function of absolute color strength when motion was either weak (light shading) or strong (dark shading). No differences in overall choice sensitivity were found between the uni- and bimanual task (repeated-measures ANOVA, motion sensitivity:  $F_{1,7} = 0.21$ ,  $p = 0.664$ ; color sensitivity:  $F_{1,7} = 0.70$ ,  $p = 0.431$ ). Similarly, overall RTs were similar in the uni- and bimanual task (motion:  $F_{1,7} = 0.56$ ,  $p = 0.477$ ; color:  $F_{1,7} = 0.57$ ,  $p = .476$ ). Furthermore, the modulation of RTs by the informative and uninformative dimensions, respectively, was not affected by task (uni-/bimanual; all interactions  $p > 0.05$ ). This suggests that overall performance, and modulation of RTs by each decision dimension, were similar in the uni- and bimanual tasks. Data points represent mean  $\pm$  s.e.m. ( $N = 8$ ).

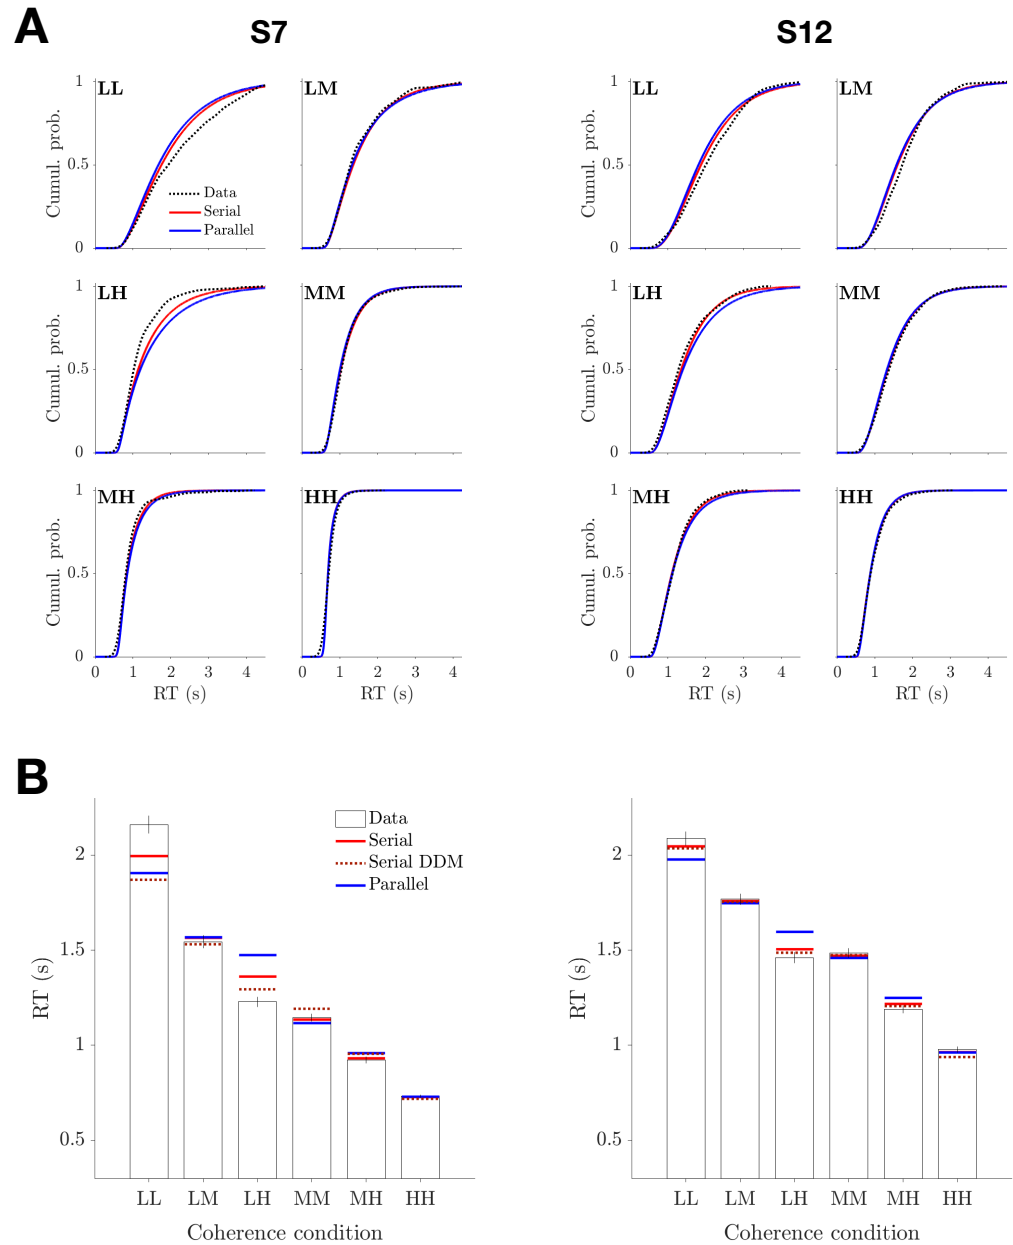

**Figure 7-Figure supplement 1.** Comparison of parallel and serial rules applied to reaction time distributions in the Same vs. Different task. The analysis is a variant of the one introduced in *Figure 2-Figure Supplement 2*, applied to RT distributions associated with the six unique combinations of motion strength (correct choices only). The analysis optimizes the parameters of gamma distributions representing three 1D decision times, corresponding to the three unique motion strengths, and one non-decision time to best explain the six observed distributions of RTs. **A.** Best fitting RT distributions for each participant, shown as cumulative probability distributions. Dashed black curves are data. Solid curves are best fitting distributions under serial (red) and parallel (blue) combination rules. **B.** Superposition of the expectations obtained from the fitted distributions (panel A) on the mean RT and DDM fits shown in Fig. 7B).
